# Supplementary material for: Metal-free catalytic hydroboration of imine with pinacolborane using a pincer-type phosphorus compound: mechanistic insight and improvement of the reaction
Source: Royal Society of Chemistry journal article supplement (doi:10.1039/d3cp01709e), 2023-01-01
Supplement: d3cp01709e1.pdf [file d3cp01709e1.pdf]

## Supplementary Information

### Metal-Free Catalytic Hydroboration of Imine with Pinacolborane by Pincer-Type Phosphorus Compound: Mechanistic Insights and Improvement of Reaction

Deshuai Yang,<sup>‡ab</sup> Shuoqi Zhang,<sup>‡b</sup> Guixiang Zeng<sup>\*b</sup> and Zhao-Xu Chen<sup>\*a</sup>

*<sup>a</sup>Institute of Theoretical and Computational Chemistry, School of Chemistry and Chemical Engineering, Nanjing University, Nanjing 210023, People's Republic of China*

*<sup>b</sup>Kuang Yaming Honors School, Nanjing University, Nanjing 210023, People's Republic of China*

---

E-mail: [gxzeng@nju.edu.cn](mailto:gxzeng@nju.edu.cn)  
[zxchen@nju.edu.cn](mailto:zxchen@nju.edu.cn)

### **1. Complete Representation of Reference 17**

Gaussian 16, Revision A.03, M. J. Frisch, G. W. Trucks, H. B. Schlegel, G. E. Scuseria, M. A. Robb, J. R. Cheeseman, G. Scalmani, V. Barone, G. A. Petersson, H. Nakatsuji, X. Li, M. Caricato, A. V. Marenich, J. Bloino, B. G. Janesko, R. Gomperts, B. Mennucci, H. P. Hratchian, J. V. Ortiz, A. F. Izmaylov, J. L. Sonnenberg, D. Williams-Young, F. Ding, F. Lipparini, F. Egidi, J. Goings, B. Peng, A. Petrone, T. Henderson, D. Ranasinghe, V. G. Zakrzewski, J. Gao, N. Rega, G. Zheng, W. Liang, M. Hada, M. Ehara, K. Toyota, R. Fukuda, J. Hasegawa, M. Ishida, T. Nakajima, Y. Honda, O. Kitao, H. Nakai, T. Vreven, K. Throssell, J. A. Montgomery, Jr., J. E. Peralta, F. Ogliaro, M. J. Bearpark, J. J. Heyd, E. N. Brothers, K. N. Kudin, V. N. Staroverov, T. A. Keith, R. Kobayashi, J. Normand, K. Raghavachari, A. P. Rendell, J. C. Burant, S. S. Iyengar, J. Tomasi, M. Cossi, J. M. Millam, M. Klene, C. Adamo, R. Cammi, J. W. Ochterski, R. L. Martin, K. Morokuma, O. Farkas, J. B. Foresman, and D. J. Fox, Gaussian, Inc, Wallingford CT, 2016.

## 2. Computational Details

### 2.1 Computational Details of the Evaluation of Gibbs Free Energy in Solution

In this work, the Gibbs energy was evaluated under experimental conditions (323.15 K, 1 atm and in the benzene solvent) based on the optimized geometry structures. We provided the electronic energy ( $E_{sol}$ ) with zero-point energy correction as well as the Gibbs energy ( $G_{sol}^0$ ) in solution to discuss the reaction profile. For each species, the  $E_{sol}$  is defined through eq S1:

$$E_{sol} = E_{sol}^{pot} + E_{gas}^{v_0} \quad (S1)$$

where  $E_{sol}^{pot}$  is the electronic potential energy calculated by DLPNO-CCSD(T)/cc-pVDZ method and  $E_{gas}^{v_0}$  represents the zero-point vibrational energy in the gas phase. In a bimolecular process, such as the reaction of the **1NP** and HBpin, the entropy change must be taken into consideration because the entropy considerably decreases in the process. In this case, the Gibbs energy ( $G_{sol}^0$ ) must be calculated as follows:

$$\begin{aligned} G_{sol}^0 &= H^0 - T(S_r^0 + S_v^0 + S_t^0) \\ &= E^T + P\Delta V - T(S_r^0 + S_v^0 + S_t^0) \\ &= E_{sol} + E_{therm} - T(S_r^0 + S_v^0 + S_t^0) \end{aligned} \quad (S2)$$

where  $\Delta V$  is 0 in solution,  $E_{therm}$  is the thermal correction by translational, vibrational, and rotational movements, and  $S_r^0$ ,  $S_v^0$  and  $S_t^0$  are rotational, vibrational, and translational entropies, respectively. In general, the Sackur-Tetrode equation is used to evaluate translational entropy  $S_t^0$ . In solution phase, however, the usual Sackur-Tetrode equation cannot be directly applied to the evaluation of  $S_t^0$ , because  $S_t^0$  is suppressed very much in solution.<sup>[S1]</sup> In this context, the translational entropy was evaluated using the method developed by Whitesides *et al.*<sup>[S2]</sup>

## 2.2 Functional Evaluation

**Table S1.** Comparison of the geometrical parameters of the **1NP** optimized by various DFT functionals with the experimental molecular crystal structure.

| Functionals    | P-N1 (Å) | P-N2 (Å) | P-N3 (Å) | N2-P-N3 (°) |
|----------------|----------|----------|----------|-------------|
| B3LYP-D3       | 1.742    | 1.734    | 1.783    | 115.4       |
| B3PW91-D3      | 1.745    | 1.717    | 1.774    | 115.0       |
| BMK-D3         | 1.742    | 1.698    | 1.758    | 112.7       |
| BP86-D3        | 1.758    | 1.754    | 1.800    | 118.7       |
| M05-2X         | 1.760    | 1.702    | 1.772    | 112.0       |
| M06            | 1.754    | 1.711    | 1.768    | 112.7       |
| M06-2X         | 1.753    | 1.702    | 1.768    | 112.3       |
| PBE0-D3        | 1.758    | 1.754    | 1.795    | 119.7       |
| TPSS-D3        | 1.749    | 1.746    | 1.791    | 118.7       |
| $\omega$ B97XD | 1.740    | 1.701    | 1.762    | 113.1       |
| LC-wPBE        | 1.737    | 1.694    | 1.756    | 112.3       |
| Exp.           | 1.720    | 1.701    | 1.761    | 115.2       |

## 2.3 Examination of Basis Set and Theoretical Methods

In our previous work<sup>[S3]</sup>, the BS-I basis set system was employed for the hydrogen generation from ammonia borane catalyzed by the pincer-type triamide phosphorus compound **1NP**; see Table S2 for details of the BS-I. In our present work, however, the employment of BS-I for imine hydroboration reaction was hindered due to the large size of **Acr<sup>Dipp</sup>-1NP**-catalyzed reaction system. It is difficult to use the same basis set in the present work. Therefore, we made effort to reduce the number of basis sets by using BS-II. The corresponding examination of the basis set effects was shown in Table S3, where the imine hydroboration reaction by **1NP** was employed as the model system. As shown in Table S3, the energy changes evaluated by BS-II was similar to those by BS-I. It is concluded that the use of BS-II is a reasonable choice for energy evaluation. In addition, a comparison of B3PW91-D3 and DLPNO-CCSD(T) methods on the reaction energies and energy barriers for the whole reaction cycles was performed, and the calculated results are presented in Table S4.

**Table S2** Details of BS-I and BS-II.

|              | Phosphorus  | Hydride of HBpin | methyl (Me) groups | other atoms |
|--------------|-------------|------------------|--------------------|-------------|
| <b>BS-I</b>  | 6-311+G(2d) | 6-311++G(d,p)    | 6-311G(d)          | 6-311+G(d)  |
| <b>BS-II</b> | 6-31+G(2d)  | 6-31++G(d,p)     | 6-31G(d)           | 6-31+G(d)   |

**Table S3.** Basis set effects on energy changes of the hydroboration reaction of imine.

| Species                         | $\Delta G$ (kcal/mol) |       |
|---------------------------------|-----------------------|-------|
|                                 | BS-I                  | BS-II |
| <b>1NP + HBpin + 2</b>          | 0.0                   | 0.0   |
| <b>TS<sub>1NP/2NP</sub> + 2</b> | 20.2                  | 19.5  |
| <b>2NP + 2</b>                  | -19.9                 | -19.8 |
| <b>2NP' + 2</b>                 | -19.0                 | -18.6 |
| <b>TS<sub>2NP'/3NP</sub></b>    | 5.1                   | 4.6   |
| <b>3NP</b>                      | -44.1                 | -45.2 |
| <b>TS<sub>1NP/3NP</sub></b>     | -24.1                 | -25.5 |
| <b>TS<sub>2NP/1NP</sub> + 2</b> | -11.0                 | -12.3 |
| <b>1NP + 4</b>                  | -37.4                 | -38.6 |

**Table S4.** Electronic energy changes calculated by B3PW91-D3 and DLPNO-CCSD(T) methods, respectively, for hydroboration reaction of imine.

| Species                         | $\Delta E$ (kcal/mol) |               | Species                                            | $\Delta E$ (kcal/mol) |               |
|---------------------------------|-----------------------|---------------|----------------------------------------------------|-----------------------|---------------|
|                                 | B3PW91-D3             | DLPNO-CCSD(T) |                                                    | B3PW91-D3             | DLPNO-CCSD(T) |
| <b>1NP + HBpin + 2</b>          | 0.0                   | 0.0           | <b>Acr<sup>Dipp</sup>-1NP+ HBpin + 2</b>           | 0.0                   | 0.0           |
| <b>TS<sub>1NP/2NP</sub> + 2</b> | 10.2                  | 16.1          | <b>Acr<sup>Dipp</sup>-TS<sub>1NP/2NP</sub> + 2</b> | 17.1                  | 14.4          |
| <b>2NP + 2</b>                  | -27.7                 | -24.9         | <b>Acr<sup>Dipp</sup>-2NP + 2</b>                  | -15.4                 | -18.5         |
| <b>2NP' + 2</b>                 | -26.2                 | -24.3         | <b>Acr<sup>Dipp</sup>-2NP' + 2</b>                 | -14.2                 | -14.4         |
| <b>TS<sub>2NP'/3NP</sub></b>    | -10.4                 | 1.9           | <b>Acr<sup>Dipp</sup>-TS<sub>2NP'/3NP</sub></b>    | 6.8                   | 13.2          |
| <b>3NP</b>                      | -62.2                 | -56.1         | <b>Acr<sup>Dipp</sup>-3NP</b>                      | -53.7                 | -54.3         |
| <b>TS<sub>1NP/3NP</sub></b>     | -46.0                 | -38.3         | <b>Acr<sup>Dipp</sup>-TS<sub>1NP/3NP</sub></b>     | -42.1                 | -42.0         |
| <b>TS<sub>2NP/1NP</sub> + 2</b> | -31.0                 | -17.7         | <b>Acr<sup>Dipp</sup>-TS<sub>2NP/1NP</sub> + 2</b> | -14.8                 | -6.9          |
| <b>1NP + 4</b>                  | -47.8                 | -42.7         | <b>Acr<sup>Dipp</sup>-1NP + 4</b>                  | -46.5                 | -42.7         |

### 3. Details of Distortion/Interaction Analysis

Here, we applied the distortion/interaction analysis to investigate the key transition states,  $\text{TS}_{2\text{NP}'/3\text{NP}}$  and  $\text{TS}_{2\text{NP}/1\text{NP}}$ . Each transition state structure has been separated into two fragments, followed by single-point calculation. For each fragment, the distortion energy refers to the electronic energy change for the distortion process of **2NP**, **2NP'** and imine as they go from the equilibrium structure to transition state, which were represented by  $\Delta E_{2\text{NP}}^{\text{dis}}$ ,  $\Delta E_{2\text{NP}'},$  and  $\Delta E_{\text{imine}}^{\text{dis}}$ , respectively. The interaction energy  $\Delta E_{\text{int}}$  refers to the energy releasing when these fragments form a complete transition state. The activation energy  $\Delta E$  is the sum of the total  $\Delta E_{\text{dist}}$  and  $\Delta E_{\text{int}}$ .

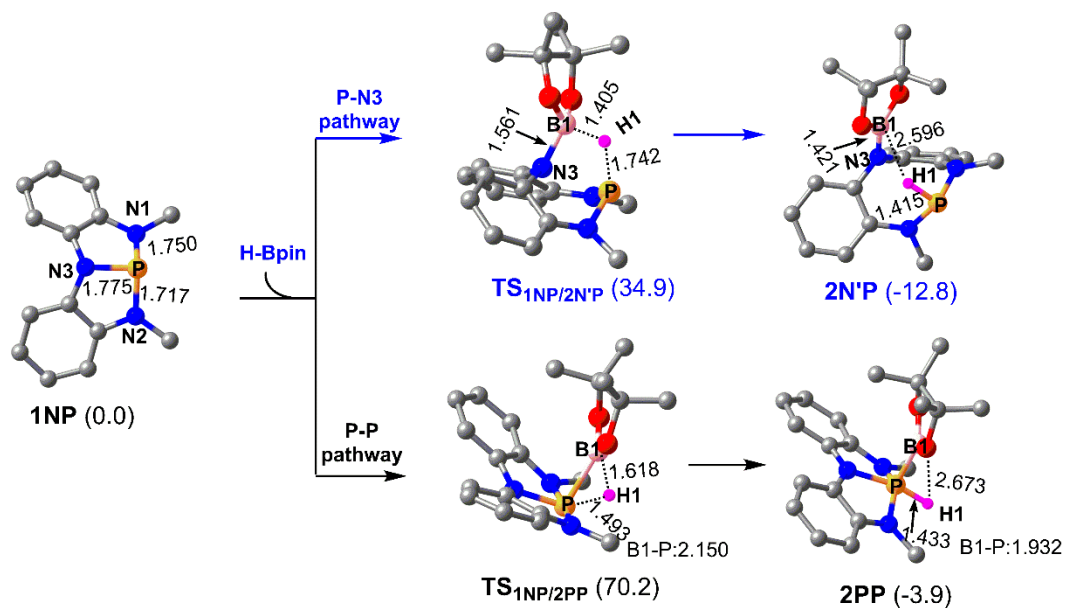

**Fig. S1** Changes in geometry and the Gibbs energy in PN3 and PP pathways for the H-Bpin bond activation by **1NP**. Distances are given in Å. Gibbs energy changes are written next to each species (in kcal/mol).

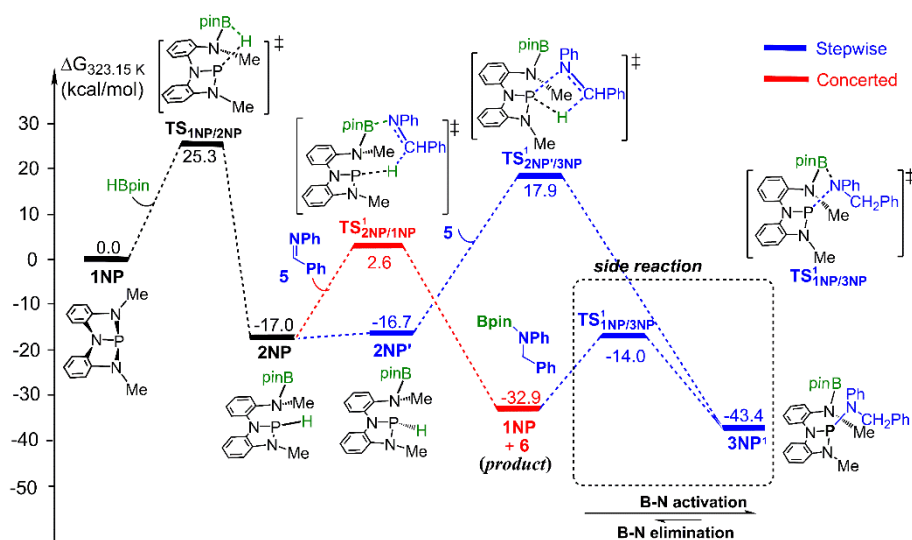

**Fig. S2** Gibbs energy profile of the concerted and stepwise pathways for hydroboration reaction of PhCH=NPh catalysed by **1NP**.

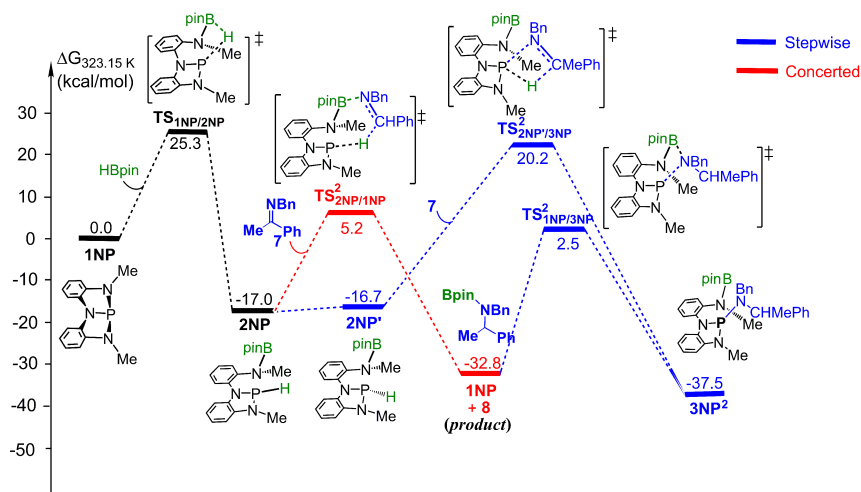

**Fig. S3** Gibbs energy profile of the concerted and stepwise pathways for hydroboration reaction of PhCMe=NBn catalysed by **1NP**.

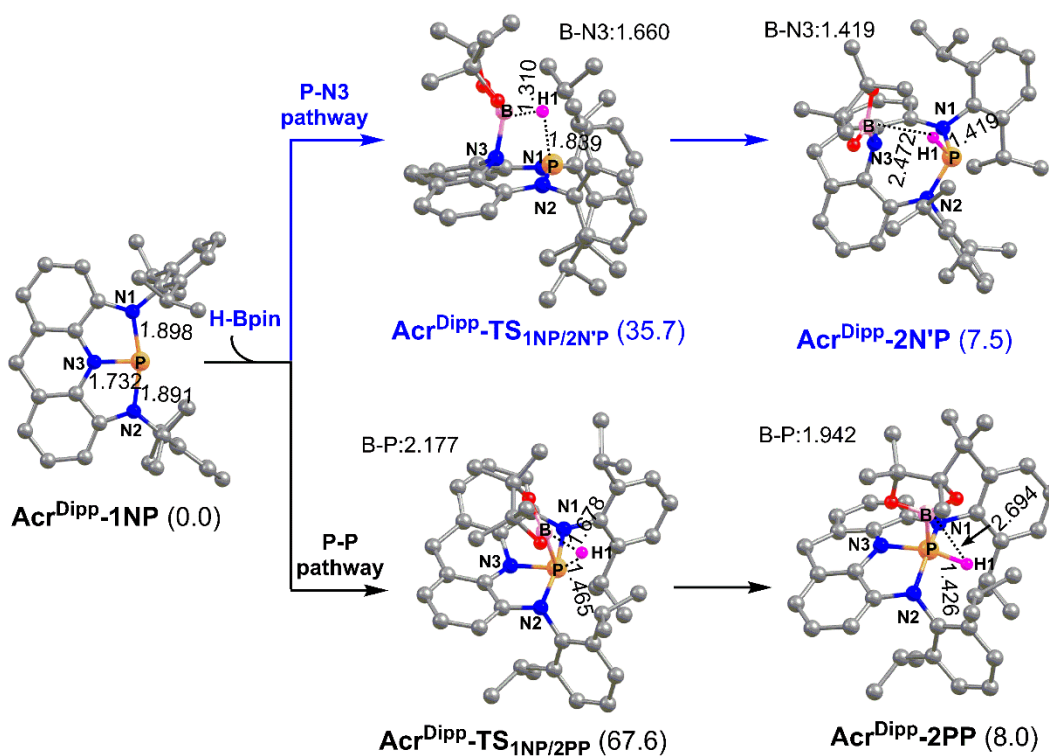

**Fig. S4** Changes in geometry and the Gibbs energy in PN3 and PP pathways for the H-Bpin bond activation by **Acr<sup>Dipp</sup>-1NP**. Distances are given in Å. Gibbs energy changes are written next to each species (in kcal/mol).



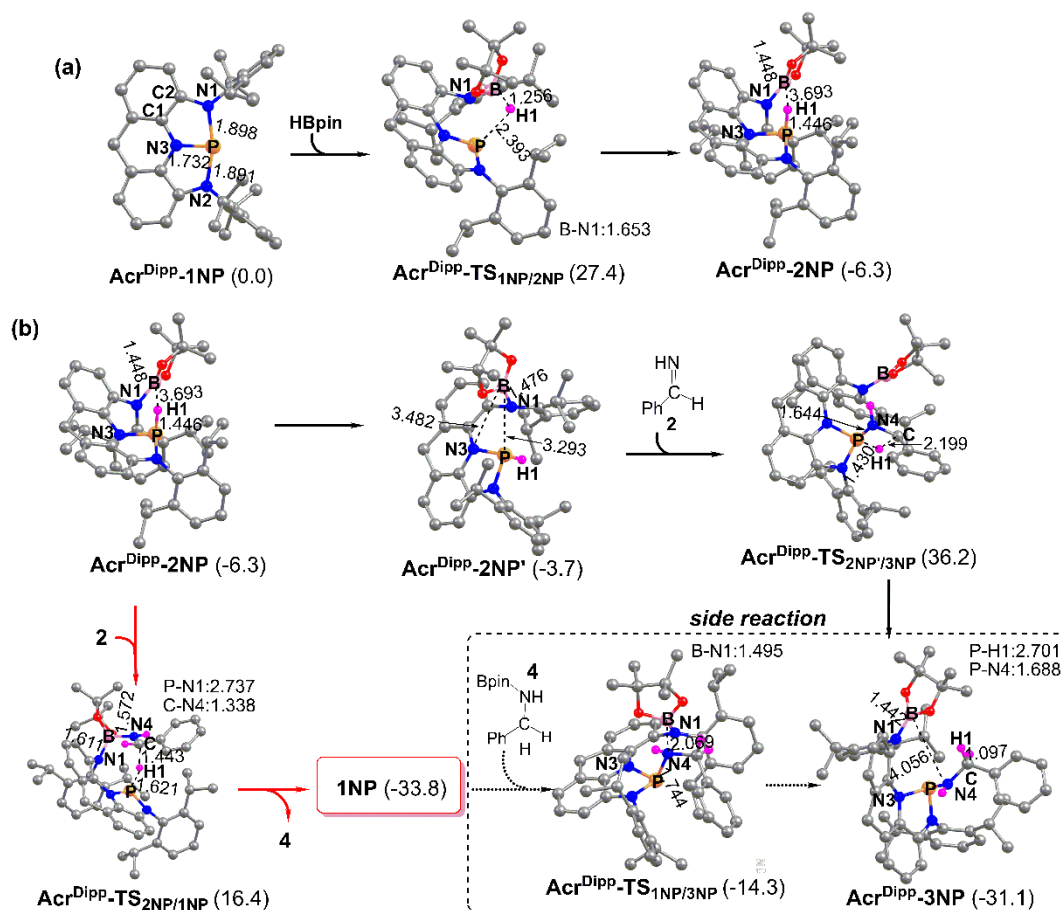

**Fig. S5** Changes in geometry and the Gibbs energy involved in the catalytic hydroboration of benzylamine by  $\text{Acr}^{\text{Dipp-1NP}}$ . (a) B-H bond activation step; (b) concerted and stepwise pathways for hydroboration reaction. Distances are given in Å. Gibbs energy changes are written next to each species (in kcal/mol).

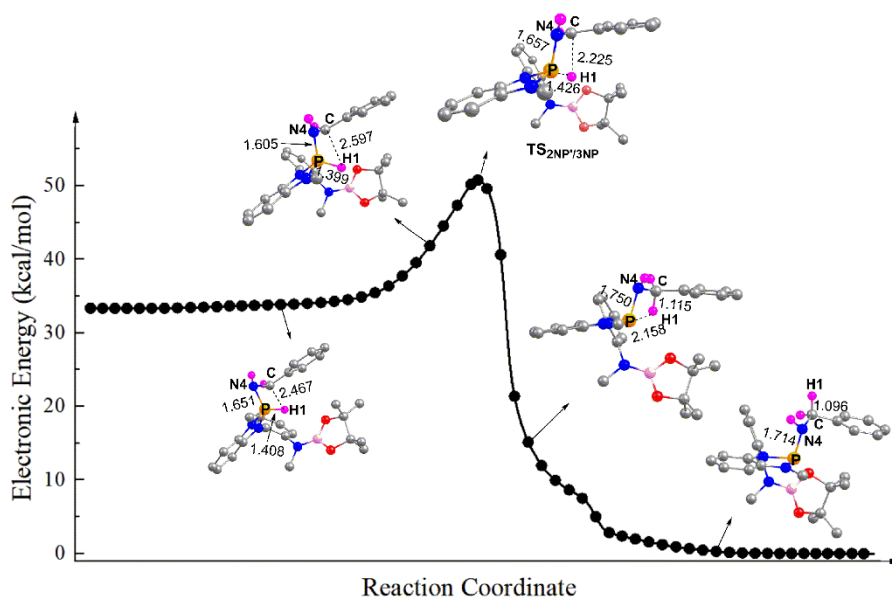

**Fig. S6** IRC profile of  $\text{TS}_{2\text{NP}'/3\text{NP}}$ . Distances are given in Å.

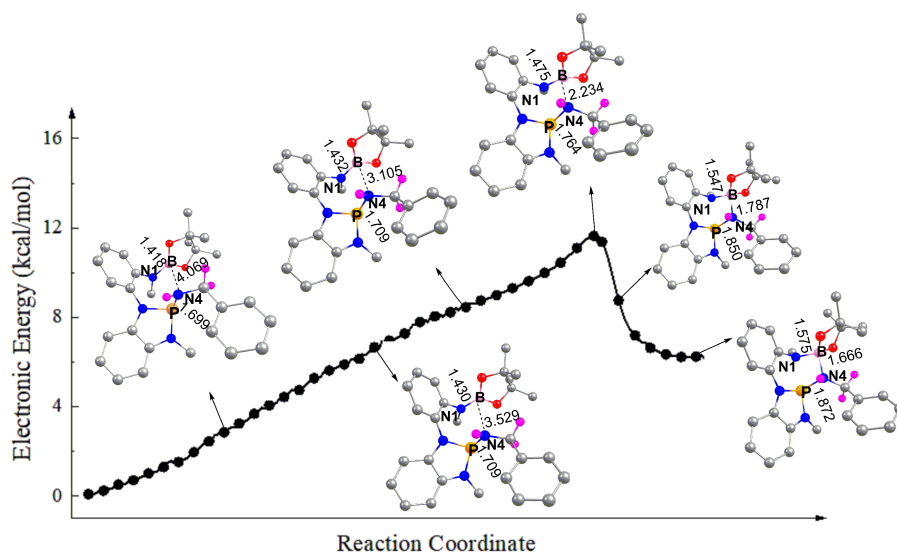

Fig. S7 IRC profile of  $TS_{1NP/3NP}$ . Distances are given in Å.

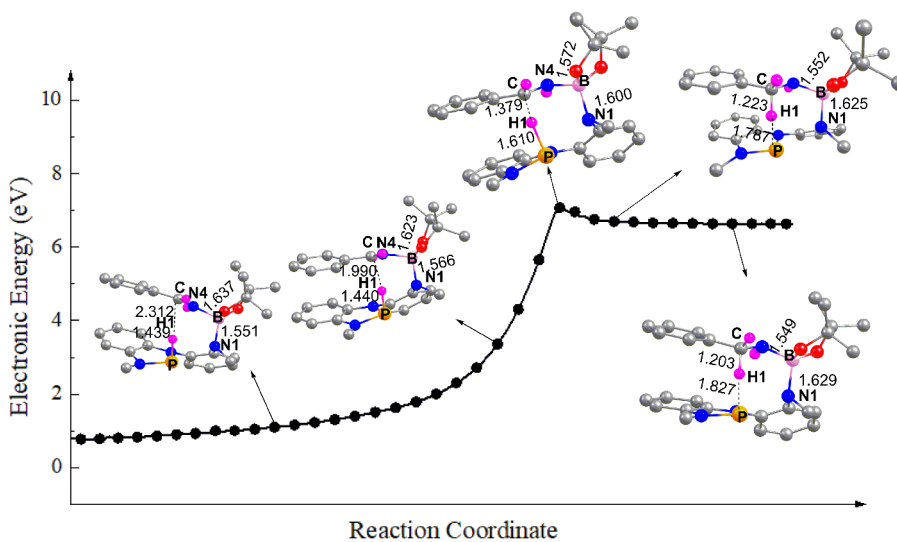

Fig. S8 IRC profile of  $TS_{2NP/1NP}$ . Distances are given in Å.

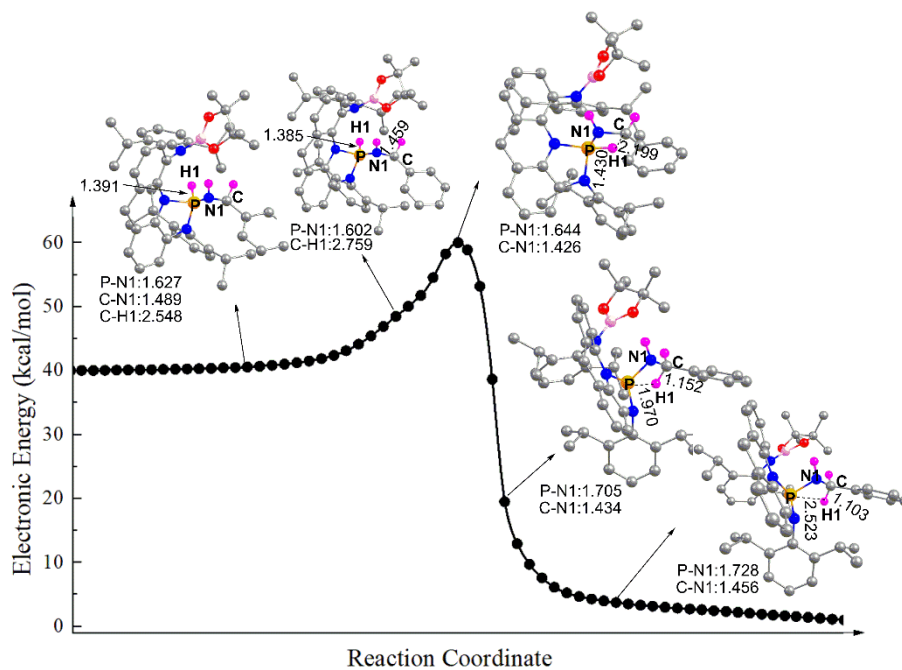

**Fig. S9** IRC profile of  $\text{Acr}^{\text{Dipp}}\text{-TS}_{1\text{NP}/3\text{NP}}$ . Distances are given in Å.

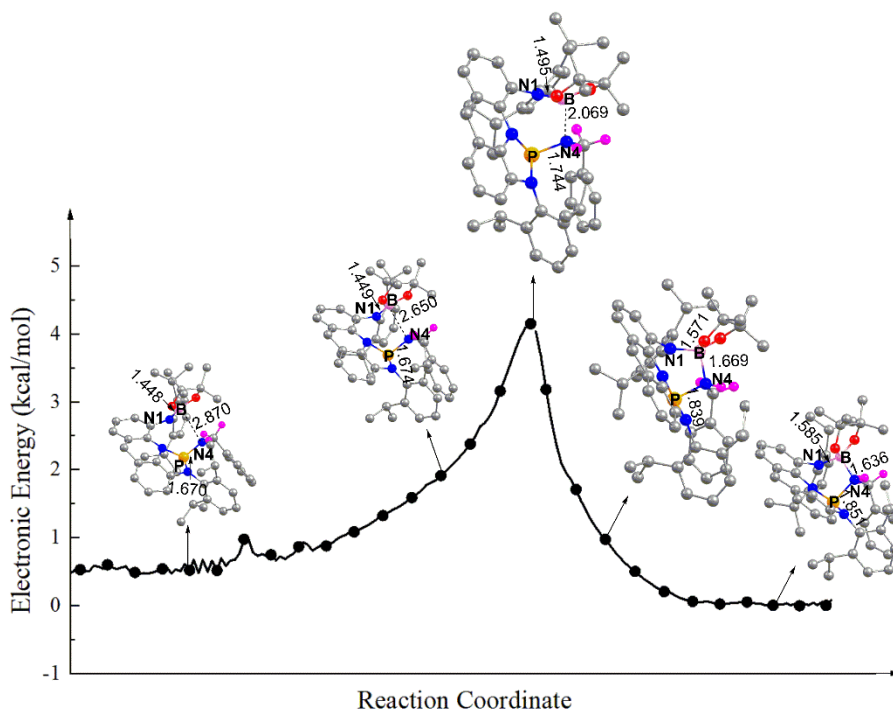

**Fig. S10** IRC profile of  $\text{Acr}^{\text{Dipp}}\text{-TS}_{2\text{NP}/3\text{NP}}$ . Distances are given in Å.

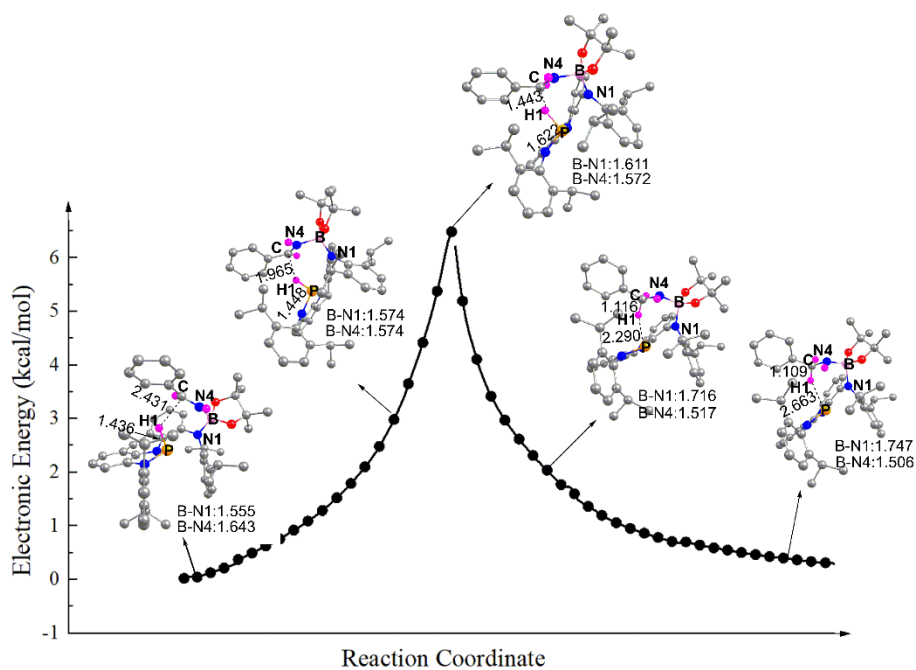

**Fig. S11** IRC profile of Acr<sup>Dipp</sup>-TS<sub>2NP/1NP</sub>. Distances are given in Å.

### References:

- [S1] S. Sakaki, Y. Y. Ohnishi and H. Sato, *Chem. Rec.*, **2010**, *10*, 29–45.
- [S2] M. Mammen, E. I. Shakhnovich, J. M. Deutch and G. M. Whitesides, *J. Org. Chem.*, **1998**, *63*, 3821–3830.
- [S3] D. Yang, P. Bao, Z. Yang, Z. Chen, S. Sakaki, S. Maeda and G. Zeng, *ChemCatChem*, **2021**, *13*, 3925–3929.

## Cartesian Coordinates

### HBpin

E(B3PW91-D3) = -411.752009 au

E(DLPNO-CCSD(T)) = -411.046719 au

G<sub>cont</sub> = 0.167108 au

G = -410.879676 au

|   |              |              |              |
|---|--------------|--------------|--------------|
| B | 0.000000000  | 1.938748000  | 0.000000000  |
| O | -1.068156000 | 1.192859000  | -0.415149000 |
| O | 1.068156000  | 1.192859000  | 0.415149000  |
| C | -0.781984000 | -0.190839000 | -0.054015000 |
| C | 0.781984000  | -0.190839000 | 0.054015000  |
| H | 0.000000000  | 3.129434000  | 0.000000000  |
| C | -1.347279000 | -1.104939000 | -1.128070000 |
| H | -1.065868000 | -2.145095000 | -0.929240000 |
| H | -2.440126000 | -1.040657000 | -1.129588000 |
| H | -0.989786000 | -0.828473000 | -2.122726000 |
| C | -1.478759000 | -0.443407000 | 1.281456000  |
| H | -2.546426000 | -0.230136000 | 1.170137000  |
| H | -1.364390000 | -1.484508000 | 1.599991000  |
| H | -1.082012000 | 0.209518000  | 2.065867000  |
| C | 1.347279000  | -1.104939000 | 1.128071000  |
| H | 1.065869000  | -2.145094000 | 0.929240000  |
| H | 2.440126000  | -1.040657000 | 1.129588000  |
| H | 0.989786000  | -0.828473000 | 2.122726000  |
| C | 1.478759000  | -0.443407000 | -1.281456000 |
| H | 2.546426000  | -0.230136000 | -1.170137000 |
| H | 1.364390000  | -1.484509000 | -1.599991000 |
| H | 1.082012000  | 0.209518000  | -2.065867000 |

### 2

E(B3PW91-D3) = -325.595033 au

E(DLPNO-CCSD(T)) = -324.995652 au

G<sub>cont</sub> = 0.100543 au

G = -324.895109 au

|   |              |              |              |
|---|--------------|--------------|--------------|
| C | 1.970999000  | 0.480140000  | 0.000147000  |
| C | 0.523200000  | 0.208935000  | 0.000069000  |
| C | -0.374875000 | 1.285169000  | 0.000009000  |
| C | 0.021790000  | -1.102685000 | 0.000063000  |
| C | -1.751628000 | 1.059941000  | -0.000062000 |
| H | 0.007466000  | 2.304538000  | 0.000025000  |
| C | -1.350856000 | -1.326987000 | 0.000001000  |
| H | 0.722574000  | -1.932734000 | 0.000120000  |

|   |              |              |              |
|---|--------------|--------------|--------------|
| C | -2.241204000 | -0.246777000 | -0.000067000 |
| H | -2.439573000 | 1.901644000  | -0.000112000 |
| H | -1.732843000 | -2.344935000 | 0.000012000  |
| H | -3.313616000 | -0.426164000 | -0.000120000 |
| N | 2.849128000  | -0.449164000 | -0.000128000 |
| H | 2.238726000  | 1.546993000  | 0.000200000  |
| H | 3.788811000  | -0.051612000 | -0.000188000 |

#### 4

E(B3PW91-D3) = -737.423187 au

E(DLPNO-CCSD(T)) = -736.110391 au

G<sub>cont</sub> = 0.281694 au

G = -735.828697 au

|   |              |              |              |
|---|--------------|--------------|--------------|
| C | -1.537121000 | -1.546226000 | 0.753315000  |
| C | -2.630389000 | -0.584521000 | 0.330312000  |
| C | -2.329766000 | 0.770251000  | 0.133304000  |
| C | -3.941704000 | -1.019607000 | 0.121500000  |
| C | -3.318650000 | 1.668018000  | -0.263105000 |
| H | -1.311244000 | 1.116410000  | 0.295300000  |
| C | -4.937734000 | -0.122904000 | -0.277117000 |
| H | -4.188713000 | -2.069754000 | 0.269651000  |
| C | -4.628278000 | 1.223033000  | -0.471133000 |
| H | -3.070807000 | 2.717118000  | -0.408489000 |
| H | -5.952931000 | -0.478433000 | -0.438165000 |
| H | -5.400450000 | 1.922756000  | -0.781918000 |
| N | -0.446261000 | -1.640972000 | -0.202783000 |
| B | 0.740662000  | -0.889870000 | -0.129196000 |
| O | 1.096653000  | -0.139566000 | 0.980065000  |
| O | 1.673872000  | -0.824643000 | -1.149609000 |
| C | 2.226627000  | 0.671220000  | 0.574089000  |
| C | 2.844329000  | -0.180297000 | -0.588011000 |
| C | 3.141545000  | 0.876121000  | 1.770030000  |
| H | 4.057405000  | 1.395962000  | 1.466634000  |
| H | 2.634996000  | 1.488133000  | 2.523657000  |
| H | 3.414218000  | -0.075157000 | 2.233352000  |
| C | 1.667351000  | 2.011029000  | 0.095291000  |
| H | 1.068457000  | 2.451738000  | 0.898891000  |
| H | 2.467535000  | 2.712195000  | -0.163473000 |
| H | 1.021796000  | 1.879652000  | -0.779819000 |
| C | 3.528641000  | 0.631335000  | -1.675643000 |
| H | 4.354005000  | 1.216535000  | -1.254619000 |
| H | 3.939309000  | -0.040645000 | -2.436393000 |
| H | 2.829626000  | 1.312435000  | -2.167182000 |

|   |              |              |              |
|---|--------------|--------------|--------------|
| C | 3.771623000  | -1.286026000 | -0.084508000 |
| H | 3.994791000  | -1.964768000 | -0.913761000 |
| H | 4.715214000  | -0.878719000 | 0.293386000  |
| H | 3.296332000  | -1.867194000 | 0.712957000  |
| H | -1.112125000 | -1.214504000 | 1.706504000  |
| H | -1.967759000 | -2.539501000 | 0.927053000  |
| H | -0.672181000 | -2.102986000 | -1.071692000 |

**1NP**

E(B3PW91-D3) = -1047.288346 au

E(DLPNO-CCSD(T)) = -1045.588302 au

G<sub>cont</sub> = 0.220938 au

G = -1045.367364 au

|   |              |              |              |
|---|--------------|--------------|--------------|
| P | -0.065218000 | 1.539159000  | -0.890861000 |
| N | -1.608988000 | 1.433921000  | -0.146122000 |
| N | 1.295170000  | 1.538225000  | 0.210256000  |
| N | 0.015927000  | -0.233047000 | -0.958386000 |
| C | -2.050024000 | 0.139113000  | 0.102136000  |
| C | -1.152688000 | -0.821549000 | -0.402737000 |
| C | -1.451854000 | -2.173679000 | -0.307982000 |
| C | -2.648867000 | -2.565550000 | 0.309192000  |
| C | -3.533022000 | -1.613191000 | 0.812422000  |
| C | -3.238632000 | -0.246851000 | 0.715941000  |
| H | -0.772865000 | -2.920676000 | -0.702992000 |
| H | -2.883778000 | -3.623628000 | 0.388482000  |
| H | -4.461650000 | -1.926776000 | 1.282476000  |
| H | -3.922007000 | 0.497299000  | 1.114976000  |
| C | 1.962104000  | 0.319438000  | 0.236974000  |
| C | 1.282587000  | -0.683158000 | -0.486487000 |
| C | 1.846188000  | -1.935794000 | -0.663349000 |
| C | 3.088989000  | -2.214178000 | -0.072507000 |
| C | 3.749659000  | -1.233859000 | 0.664203000  |
| C | 3.196786000  | 0.044696000  | 0.822828000  |
| H | 1.342600000  | -2.684989000 | -1.265397000 |
| H | 3.536428000  | -3.195708000 | -0.203004000 |
| H | 4.714755000  | -1.452980000 | 1.114474000  |
| H | 3.721299000  | 0.806310000  | 1.392691000  |
| C | -2.455437000 | 2.589198000  | 0.062811000  |
| H | -3.434896000 | 2.441252000  | -0.408947000 |
| H | -2.604641000 | 2.792632000  | 1.130814000  |
| H | -1.978528000 | 3.464531000  | -0.390136000 |
| C | 1.969466000  | 2.768164000  | 0.570140000  |
| H | 1.373268000  | 3.616682000  | 0.216763000  |

|   |             |             |             |
|---|-------------|-------------|-------------|
| H | 2.075155000 | 2.859682000 | 1.657980000 |
| H | 2.966850000 | 2.828467000 | 0.112977000 |

**TS<sub>1NP/2N'P</sub>**

E(B3PW91-D3) = -1459.004029 au

E(DLPNO-CCSD(T)) = -1456.590920 au

G<sub>cont</sub> = 0.399490 au

G = -1456.191429 au

|   |              |              |              |
|---|--------------|--------------|--------------|
| P | -1.136391000 | 0.543047000  | -1.825834000 |
| N | -2.459321000 | -0.481288000 | -1.349415000 |
| N | -1.023881000 | 2.085379000  | -1.052706000 |
| N | -0.458281000 | -0.049624000 | 0.203731000  |
| C | -2.401901000 | -1.325961000 | -0.245869000 |
| C | -1.287892000 | -1.147619000 | 0.590086000  |
| C | -1.043585000 | -2.007612000 | 1.649217000  |
| C | -1.956872000 | -3.028326000 | 1.935089000  |
| C | -3.090100000 | -3.180565000 | 1.137489000  |
| C | -3.317546000 | -2.344778000 | 0.039886000  |
| H | -0.136678000 | -1.892495000 | 2.233404000  |
| H | -1.776426000 | -3.700065000 | 2.769669000  |
| H | -3.806455000 | -3.968405000 | 1.357768000  |
| H | -4.196646000 | -2.492345000 | -0.579388000 |
| C | -0.801757000 | 2.278491000  | 0.308223000  |
| C | -0.491569000 | 1.115392000  | 1.031666000  |
| C | -0.239113000 | 1.169087000  | 2.391645000  |
| C | -0.290111000 | 2.401816000  | 3.055699000  |
| C | -0.586227000 | 3.559944000  | 2.341481000  |
| C | -0.843475000 | 3.508883000  | 0.966622000  |
| H | 0.000332000  | 0.261900000  | 2.936336000  |
| H | -0.092070000 | 2.448803000  | 4.123034000  |
| H | -0.623272000 | 4.519244000  | 2.851810000  |
| H | -1.082556000 | 4.419578000  | 0.426393000  |
| C | -1.099474000 | 3.241367000  | -1.932114000 |
| H | -1.987434000 | 3.849058000  | -1.715912000 |
| H | -0.202946000 | 3.865023000  | -1.831032000 |
| H | -1.170453000 | 2.889146000  | -2.965824000 |
| C | -3.458531000 | -0.728784000 | -2.378286000 |
| H | -4.464808000 | -0.514601000 | -1.998456000 |
| H | -3.263914000 | -0.062048000 | -3.223984000 |
| H | -3.423081000 | -1.766823000 | -2.735058000 |
| B | 0.868678000  | -0.400867000 | -0.538841000 |
| O | 1.464002000  | -1.658389000 | -0.304037000 |
| O | 1.827869000  | 0.631423000  | -0.497051000 |



|   |             |              |              |
|---|-------------|--------------|--------------|
| C | 2.846617000 | -1.402765000 | 0.024916000  |
| C | 3.105174000 | -0.015325000 | -0.651871000 |
| C | 3.703402000 | -2.540308000 | -0.507308000 |
| H | 4.767721000 | -2.320964000 | -0.361727000 |
| H | 3.468234000 | -3.465576000 | 0.029534000  |
| H | 3.521694000 | -2.710953000 | -1.571407000 |
| C | 2.939034000 | -1.333890000 | 1.550858000  |
| H | 2.534482000 | -2.260828000 | 1.970327000  |
| H | 3.974469000 | -1.223375000 | 1.891437000  |
| H | 2.350666000 | -0.494703000 | 1.937107000  |
| C | 4.164251000 | 0.836245000  | 0.031073000  |
| H | 5.126944000 | 0.312281000  | 0.048831000  |
| H | 4.295480000 | 1.775172000  | -0.517314000 |
| H | 3.876512000 | 1.081287000  | 1.056482000  |
| C | 3.405145000 | -0.133761000 | -2.147589000 |
| H | 3.352271000 | 0.863358000  | -2.596777000 |
| H | 4.405577000 | -0.542100000 | -2.326724000 |
| H | 2.671111000 | -0.772811000 | -2.649326000 |
| H | 0.306308000 | -0.432855000 | -1.825540000 |

## 2N'P

E(B3PW91-D3) = -1459.076357 au

E(DLPNO-CCSD(T)) = -1456.669684 au

G<sub>cont</sub> = 0.402303 au

G = -1456.267381 au

|   |              |              |              |
|---|--------------|--------------|--------------|
| P | 1.097955000  | -0.475767000 | -2.128088000 |
| N | 2.333484000  | 0.311395000  | -1.232750000 |
| N | 0.594895000  | -1.819938000 | -1.120841000 |
| N | 0.239381000  | 0.360032000  | 0.674433000  |
| C | 2.108720000  | 1.467014000  | -0.459874000 |
| C | 1.037174000  | 1.515357000  | 0.462970000  |
| C | 0.784085000  | 2.687083000  | 1.175332000  |
| C | 1.599313000  | 3.808717000  | 1.026575000  |
| C | 2.693112000  | 3.746760000  | 0.163249000  |
| C | 2.941566000  | 2.589496000  | -0.574353000 |
| H | -0.052321000 | 2.694460000  | 1.869459000  |
| H | 1.394238000  | 4.710937000  | 1.596773000  |
| H | 3.351281000  | 4.604674000  | 0.048676000  |
| H | 3.777547000  | 2.567162000  | -1.267390000 |
| C | 1.003907000  | -1.935002000 | 0.215030000  |
| C | 0.903296000  | -0.833238000 | 1.092525000  |
| C | 1.413708000  | -0.908067000 | 2.386516000  |
| C | 1.984217000  | -2.085199000 | 2.867616000  |

|   |              |              |              |
|---|--------------|--------------|--------------|
| C | 2.025568000  | -3.201717000 | 2.032129000  |
| C | 1.548734000  | -3.127979000 | 0.724412000  |
| H | 1.327988000  | -0.028101000 | 3.019938000  |
| H | 2.366329000  | -2.135912000 | 3.883678000  |
| H | 2.445648000  | -4.138591000 | 2.390905000  |
| H | 1.623970000  | -4.004920000 | 0.089931000  |
| C | 0.363118000  | -3.052069000 | -1.869081000 |
| H | 1.281448000  | -3.626830000 | -2.064319000 |
| H | -0.341837000 | -3.686133000 | -1.320927000 |
| H | -0.089605000 | -2.804165000 | -2.832461000 |
| C | 3.708670000  | -0.047220000 | -1.566335000 |
| H | 4.339426000  | 0.048790000  | -0.676326000 |
| H | 3.735800000  | -1.092077000 | -1.889357000 |
| H | 4.132591000  | 0.569650000  | -2.371453000 |
| B | -1.159085000 | 0.333621000  | 0.424882000  |
| O | -1.828521000 | 1.349394000  | -0.224389000 |
| O | -1.966642000 | -0.726890000 | 0.772871000  |
| C | -3.239260000 | 1.022740000  | -0.136090000 |
| C | -3.204827000 | -0.533531000 | 0.045251000  |
| C | -3.930683000 | 1.500481000  | -1.401860000 |
| H | -4.975624000 | 1.170505000  | -1.414213000 |
| H | -3.916156000 | 2.594525000  | -1.442162000 |
| H | -3.431472000 | 1.121482000  | -2.296951000 |
| C | -3.791955000 | 1.752784000  | 1.086797000  |
| H | -3.589590000 | 2.823264000  | 0.980931000  |
| H | -4.873516000 | 1.612014000  | 1.183415000  |
| H | -3.309320000 | 1.403044000  | 2.005705000  |
| C | -4.350850000 | -1.105190000 | 0.862584000  |
| H | -5.311137000 | -0.877634000 | 0.386031000  |
| H | -4.250964000 | -2.193474000 | 0.929407000  |
| H | -4.357734000 | -0.702521000 | 1.878357000  |
| C | -3.064005000 | -1.284056000 | -1.278934000 |
| H | -2.828967000 | -2.331347000 | -1.066511000 |
| H | -3.988772000 | -1.244567000 | -1.863851000 |
| H | -2.246494000 | -0.873457000 | -1.880083000 |
| H | 0.098682000  | 0.484175000  | -1.840799000 |

**TS<sub>1NP/2PP</sub>**

E(B3PW91-D3) = -1458.956451 au

E(DLPNO-CCSD(T)) = -1456.534058 au

G<sub>cont</sub> = 0.398878 au

G = -1456.135180 au

|   |              |              |             |
|---|--------------|--------------|-------------|
| P | -0.447436000 | -0.521728000 | 1.842135000 |
| N | -0.883520000 | -1.524292000 | 0.402239000 |

|   |              |              |              |
|---|--------------|--------------|--------------|
| N | 1.058412000  | -1.495902000 | 1.868937000  |
| N | -2.009543000 | 0.315253000  | 1.579030000  |
| C | 1.366062000  | -2.056316000 | 0.652009000  |
| C | 0.237118000  | -2.109849000 | -0.203736000 |
| C | 0.378339000  | -2.629638000 | -1.488771000 |
| C | 1.624722000  | -3.117774000 | -1.906372000 |
| C | 2.729431000  | -3.066786000 | -1.060185000 |
| C | 2.609607000  | -2.515845000 | 0.220798000  |
| H | -0.448532000 | -2.646293000 | -2.184388000 |
| H | 1.719363000  | -3.531993000 | -2.906872000 |
| H | 3.692169000  | -3.447448000 | -1.392779000 |
| H | 3.473899000  | -2.441552000 | 0.874211000  |
| C | -2.641121000 | 0.009509000  | 0.407358000  |
| C | -3.777126000 | 0.620640000  | -0.126482000 |
| C | -4.373634000 | 0.077666000  | -1.271645000 |
| C | -3.841163000 | -1.059009000 | -1.872761000 |
| C | -2.676637000 | -1.654375000 | -1.361623000 |
| C | -2.048083000 | -1.099134000 | -0.251237000 |
| H | -4.201105000 | 1.496536000  | 0.355935000  |
| H | -5.268036000 | 0.543100000  | -1.678981000 |
| H | -4.323169000 | -1.499055000 | -2.741738000 |
| H | -2.306766000 | -2.564920000 | -1.815011000 |
| B | 0.559588000  | 1.070112000  | 0.804882000  |
| O | 1.863655000  | 0.965756000  | 0.439877000  |
| O | -0.160683000 | 2.014969000  | 0.147504000  |
| C | 1.969713000  | 1.710117000  | -0.822095000 |
| C | 0.803447000  | 2.746232000  | -0.684456000 |
| C | 3.358456000  | 2.314069000  | -0.911583000 |
| H | 4.100845000  | 1.515376000  | -1.005250000 |
| H | 3.433632000  | 2.956704000  | -1.796046000 |
| H | 3.601139000  | 2.905696000  | -0.025609000 |
| C | 1.191079000  | 3.994442000  | 0.101817000  |
| H | 1.864163000  | 4.632954000  | -0.479508000 |
| H | 0.286634000  | 4.565295000  | 0.333257000  |
| H | 1.682423000  | 3.733406000  | 1.044992000  |
| C | 0.123476000  | 3.114812000  | -1.990165000 |
| H | -0.673235000 | 3.840840000  | -1.800483000 |
| H | 0.846169000  | 3.568918000  | -2.677399000 |
| H | -0.320243000 | 2.240875000  | -2.471845000 |
| C | 1.743549000  | 0.690087000  | -1.933651000 |
| H | 1.899971000  | 1.140378000  | -2.919451000 |
| H | 2.444455000  | -0.140025000 | -1.805760000 |
| H | 0.733980000  | 0.270798000  | -1.891276000 |
| C | 2.084458000  | -1.139654000 | 2.814883000  |

|   |              |              |             |
|---|--------------|--------------|-------------|
| H | 2.630481000  | -2.036263000 | 3.132227000 |
| H | 2.800438000  | -0.413437000 | 2.401953000 |
| H | 1.611593000  | -0.702535000 | 3.701727000 |
| C | -2.362150000 | 1.444659000  | 2.392094000 |
| H | -2.144972000 | 2.398914000  | 1.890387000 |
| H | -3.426790000 | 1.411488000  | 2.656448000 |
| H | -1.784719000 | 1.403569000  | 3.323907000 |
| H | 0.211337000  | 0.719701000  | 2.345268000 |

## 2PP

E(B3PW91-D3) = -1459.055741 au

E(DLPNO-CCSD(T)) = -1456.641180 au

G<sub>cont</sub> = 0.400438 au

G = -1456.240742 au

|   |              |              |              |
|---|--------------|--------------|--------------|
| P | -0.476289000 | 0.192927000  | 1.527364000  |
| N | -1.217795000 | 0.396163000  | -0.133163000 |
| N | -1.518876000 | -1.177494000 | 1.676305000  |
| N | -0.479417000 | 1.921350000  | 1.590764000  |
| C | -2.081568000 | -1.633787000 | 0.489425000  |
| C | -1.921634000 | -0.710305000 | -0.574325000 |
| C | -2.445383000 | -1.006634000 | -1.829686000 |
| C | -3.123241000 | -2.220871000 | -2.024304000 |
| C | -3.271852000 | -3.126967000 | -0.979878000 |
| C | -2.748048000 | -2.836874000 | 0.290276000  |
| H | -2.327378000 | -0.324837000 | -2.661817000 |
| H | -3.524006000 | -2.450213000 | -3.008493000 |
| H | -3.789487000 | -4.069143000 | -1.141350000 |
| H | -2.861016000 | -3.547929000 | 1.103161000  |
| C | -0.665285000 | 2.563215000  | 0.371710000  |
| C | -0.469417000 | 3.912152000  | 0.099773000  |
| C | -0.726567000 | 4.393996000  | -1.193663000 |
| C | -1.167786000 | 3.530037000  | -2.190248000 |
| C | -1.360399000 | 2.165210000  | -1.922915000 |
| C | -1.110991000 | 1.677943000  | -0.642454000 |
| H | -0.118935000 | 4.587406000  | 0.874574000  |
| H | -0.570756000 | 5.447545000  | -1.411509000 |
| H | -1.358897000 | 3.904021000  | -3.192958000 |
| H | -1.687869000 | 1.508799000  | -2.718693000 |
| B | 1.198433000  | -0.387556000 | 0.757549000  |
| O | 1.389783000  | -1.667692000 | 0.320885000  |
| O | 2.181148000  | 0.486057000  | 0.393546000  |
| C | 2.428335000  | -1.581251000 | -0.704717000 |
| C | 3.221715000  | -0.308580000 | -0.258779000 |

|   |              |              |              |
|---|--------------|--------------|--------------|
| C | 3.229829000  | -2.869966000 | -0.704491000 |
| H | 2.593532000  | -3.700056000 | -1.027275000 |
| H | 4.072041000  | -2.792819000 | -1.401396000 |
| H | 3.617194000  | -3.103858000 | 0.290077000  |
| C | 4.279630000  | -0.597508000 | 0.802390000  |
| H | 5.132688000  | -1.135248000 | 0.376049000  |
| H | 4.638746000  | 0.350938000  | 1.213790000  |
| H | 3.864717000  | -1.191413000 | 1.623574000  |
| C | 3.807580000  | 0.508097000  | -1.397255000 |
| H | 4.346395000  | 1.371527000  | -0.994237000 |
| H | 4.514006000  | -0.098026000 | -1.975545000 |
| H | 3.028385000  | 0.877266000  | -2.067933000 |
| C | 1.692319000  | -1.396215000 | -2.030805000 |
| H | 2.389156000  | -1.380758000 | -2.875032000 |
| H | 0.994953000  | -2.228114000 | -2.166960000 |
| H | 1.110322000  | -0.468350000 | -2.034589000 |
| C | -1.585137000 | -1.996547000 | 2.865211000  |
| H | -2.627472000 | -2.246007000 | 3.099794000  |
| H | -1.016627000 | -2.929350000 | 2.747055000  |
| H | -1.168057000 | -1.445803000 | 3.712815000  |
| C | -0.017134000 | 2.672242000  | 2.735897000  |
| H | 0.999522000  | 3.059901000  | 2.583179000  |
| H | -0.690039000 | 3.515209000  | 2.936580000  |
| H | -0.008713000 | 2.026140000  | 3.618022000  |
| H | -0.244859000 | 0.155672000  | 2.941154000  |

**TS<sub>1NP/2NP</sub>**

E(B3PW91-D3) = -1459.055741 au

E(DLPNO-CCSD(T)) = -1456.609410 au

G<sub>cont</sub> = 0.402798 au

G = -1456.206612 au

|   |              |              |              |
|---|--------------|--------------|--------------|
| P | 0.841906000  | -1.207877000 | 0.300041000  |
| N | -0.702827000 | 0.418687000  | 1.127963000  |
| N | 2.337950000  | -2.043222000 | 0.156583000  |
| N | 1.711779000  | 0.245073000  | -0.064903000 |
| C | -0.124834000 | 1.618265000  | 0.677971000  |
| C | 1.048132000  | 1.495670000  | -0.094391000 |
| C | 1.500490000  | 2.586944000  | -0.845845000 |
| C | 0.887938000  | 3.828548000  | -0.700936000 |
| C | -0.184153000 | 3.986410000  | 0.181318000  |
| C | -0.699621000 | 2.880398000  | 0.851218000  |
| H | 2.307735000  | 2.464619000  | -1.558709000 |
| H | 1.245818000  | 4.671461000  | -1.286054000 |

|   |              |              |              |
|---|--------------|--------------|--------------|
| H | -0.656290000 | 4.958334000  | 0.299085000  |
| H | -1.594277000 | 2.973969000  | 1.458794000  |
| C | 3.451450000  | -1.277481000 | -0.107457000 |
| C | 3.096086000  | 0.083993000  | -0.200337000 |
| C | 4.107267000  | 1.046072000  | -0.310650000 |
| C | 5.431912000  | 0.623177000  | -0.406931000 |
| C | 5.768336000  | -0.736464000 | -0.384745000 |
| C | 4.778026000  | -1.700421000 | -0.221370000 |
| H | 3.884907000  | 2.104770000  | -0.289884000 |
| H | 6.215458000  | 1.371279000  | -0.491776000 |
| H | 6.807809000  | -1.040566000 | -0.471738000 |
| H | 5.027155000  | -2.755576000 | -0.161848000 |
| C | -1.171390000 | 0.370727000  | 2.507198000  |
| H | -2.014769000 | 1.052476000  | 2.685034000  |
| H | -0.358447000 | 0.634679000  | 3.193145000  |
| H | -1.511691000 | -0.644656000 | 2.718394000  |
| C | 2.415841000  | -3.480513000 | 0.348476000  |
| H | 1.415621000  | -3.860440000 | 0.576368000  |
| H | 3.084754000  | -3.723134000 | 1.181579000  |
| H | 2.779652000  | -3.971582000 | -0.560546000 |
| B | -1.580992000 | -0.193682000 | -0.000392000 |
| O | -2.519572000 | 0.673999000  | -0.674919000 |
| O | -2.294428000 | -1.349286000 | 0.472806000  |
| C | -3.819957000 | 0.092132000  | -0.540259000 |
| C | -3.496411000 | -1.420901000 | -0.299689000 |
| C | -4.507948000 | 0.736576000  | 0.667405000  |
| H | -5.551387000 | 0.415279000  | 0.766465000  |
| H | -4.491164000 | 1.824454000  | 0.541305000  |
| H | -3.977348000 | 0.490525000  | 1.592219000  |
| C | -4.625249000 | 0.373609000  | -1.802255000 |
| H | -4.828596000 | 1.447494000  | -1.881316000 |
| H | -5.585980000 | -0.155082000 | -1.778516000 |
| H | -4.077340000 | 0.068305000  | -2.697559000 |
| C | -3.196646000 | -2.167851000 | -1.603718000 |
| H | -4.102480000 | -2.327170000 | -2.199252000 |
| H | -2.768013000 | -3.145452000 | -1.357783000 |
| H | -2.469750000 | -1.619466000 | -2.211575000 |
| C | -4.549354000 | -2.176781000 | 0.498738000  |
| H | -4.255067000 | -3.227348000 | 0.601664000  |
| H | -5.520694000 | -2.142215000 | -0.008774000 |
| H | -4.662288000 | -1.758202000 | 1.502348000  |
| H | -0.642763000 | -0.534324000 | -0.862765000 |

**2NP**

E(B3PW91-D3) = -1459.084453 au

E(DLPNO-CCSD(T)) = -1456.674689 au

G<sub>cont</sub> = 0.400671 au

G = -1456.274017 au

|   |              |              |              |
|---|--------------|--------------|--------------|
| P | 1.180985000  | 0.285563000  | 1.962276000  |
| N | -1.291777000 | 1.531177000  | 0.962113000  |
| N | 2.539519000  | -0.776767000 | 1.721305000  |
| N | 1.303688000  | 0.747380000  | 0.292234000  |
| C | -0.481326000 | 2.392342000  | 0.177819000  |
| C | 0.806658000  | 1.964490000  | -0.202473000 |
| C | 1.590137000  | 2.777413000  | -1.029960000 |
| C | 1.119153000  | 4.016393000  | -1.455451000 |
| C | -0.136097000 | 4.465316000  | -1.038345000 |
| C | -0.927269000 | 3.654472000  | -0.226563000 |
| H | 2.582202000  | 2.435992000  | -1.312871000 |
| H | 1.742106000  | 4.639738000  | -2.091837000 |
| H | -0.504604000 | 5.438024000  | -1.353916000 |
| H | -1.916334000 | 3.987956000  | 0.075874000  |
| C | 2.662669000  | -1.126371000 | 0.373458000  |
| C | 1.984691000  | -0.214029000 | -0.465092000 |
| C | 2.017187000  | -0.354531000 | -1.845311000 |
| C | 2.730157000  | -1.429656000 | -2.397029000 |
| C | 3.383955000  | -2.344429000 | -1.573514000 |
| C | 3.351947000  | -2.202658000 | -0.176857000 |
| H | 1.474604000  | 0.342186000  | -2.476839000 |
| H | 2.753642000  | -1.554374000 | -3.476628000 |
| H | 3.921195000  | -3.182560000 | -2.010239000 |
| H | 3.858235000  | -2.921810000 | 0.460582000  |
| C | 2.940895000  | -1.698566000 | 2.762538000  |
| H | 4.002669000  | -1.948510000 | 2.655927000  |
| H | 2.357739000  | -2.633019000 | 2.741542000  |
| H | 2.806184000  | -1.223130000 | 3.738821000  |
| C | -1.958170000 | 2.096860000  | 2.131847000  |
| H | -1.251671000 | 2.713802000  | 2.696023000  |
| H | -2.303342000 | 1.282510000  | 2.772876000  |
| H | -2.827949000 | 2.712079000  | 1.864601000  |
| B | -1.748879000 | 0.299771000  | 0.401369000  |
| O | -1.367874000 | -0.159040000 | -0.837581000 |
| O | -2.631875000 | -0.536424000 | 1.053522000  |
| C | -1.866658000 | -1.517009000 | -0.947836000 |
| C | -3.063216000 | -1.512151000 | 0.067879000  |
| C | -2.258554000 | -1.767641000 | -2.395163000 |
| H | -2.737819000 | -2.747747000 | -2.498861000 |

|   |              |              |              |
|---|--------------|--------------|--------------|
| H | -1.361439000 | -1.757228000 | -3.022684000 |
| H | -2.941805000 | -0.999891000 | -2.766488000 |
| C | -0.738299000 | -2.461751000 | -0.540457000 |
| H | 0.139684000  | -2.261729000 | -1.160703000 |
| H | -1.033563000 | -3.507895000 | -0.673552000 |
| H | -0.447556000 | -2.309219000 | 0.503109000  |
| C | -3.309596000 | -2.837573000 | 0.768527000  |
| H | -3.542703000 | -3.618787000 | 0.036343000  |
| H | -4.160629000 | -2.743065000 | 1.451055000  |
| H | -2.439450000 | -3.150227000 | 1.350582000  |
| C | -4.359864000 | -0.981019000 | -0.541603000 |
| H | -5.087015000 | -0.814938000 | 0.259600000  |
| H | -4.787372000 | -1.692052000 | -1.256066000 |
| H | -4.193440000 | -0.027486000 | -1.054240000 |
| H | 0.135627000  | -0.709152000 | 1.871412000  |

## 2NP'

E(B3PW91-D3) = -1459.082060 au

E(DLPNO-CCSD(T)) = -1456.673711 au

G<sub>cont</sub> = 0.400097 au

G = -1456.273614 au

|   |              |              |              |
|---|--------------|--------------|--------------|
| P | 1.557649000  | -0.072437000 | 2.039234000  |
| N | -0.732460000 | 2.026512000  | 0.769726000  |
| N | 1.405917000  | -1.756785000 | 1.714761000  |
| N | 1.403074000  | 0.231440000  | 0.330901000  |
| C | 0.429741000  | 2.457204000  | 0.093750000  |
| C | 1.491584000  | 1.558842000  | -0.149286000 |
| C | 2.639231000  | 2.001553000  | -0.817614000 |
| C | 2.751921000  | 3.322784000  | -1.242717000 |
| C | 1.716140000  | 4.221435000  | -0.981269000 |
| C | 0.570398000  | 3.788134000  | -0.317305000 |
| H | 3.449548000  | 1.297052000  | -0.985264000 |
| H | 3.649756000  | 3.650742000  | -1.760205000 |
| H | 1.793713000  | 5.256977000  | -1.302989000 |
| H | -0.245019000 | 4.482573000  | -0.133716000 |
| C | 1.750724000  | -2.059138000 | 0.396543000  |
| C | 1.736168000  | -0.904002000 | -0.418151000 |
| C | 1.916561000  | -1.008891000 | -1.791024000 |
| C | 2.139759000  | -2.276853000 | -2.349395000 |
| C | 2.178002000  | -3.413514000 | -1.544314000 |
| C | 1.980916000  | -3.313107000 | -0.157962000 |
| H | 1.861249000  | -0.125434000 | -2.419475000 |
| H | 2.287267000  | -2.364924000 | -3.422757000 |



|   |              |              |              |
|---|--------------|--------------|--------------|
| H | 2.362571000  | -4.388987000 | -1.986966000 |
| H | 1.995011000  | -4.200878000 | 0.467758000  |
| C | 1.365735000  | -2.767344000 | 2.747428000  |
| H | 2.361185000  | -3.183657000 | 2.962231000  |
| H | 0.702909000  | -3.586514000 | 2.443522000  |
| H | 0.964387000  | -2.329545000 | 3.665823000  |
| C | -1.122706000 | 2.770913000  | 1.961906000  |
| H | -0.269412000 | 2.869874000  | 2.643387000  |
| H | -1.918596000 | 2.228254000  | 2.475682000  |
| H | -1.494203000 | 3.775493000  | 1.720526000  |
| B | -1.524272000 | 0.954981000  | 0.277999000  |
| O | -1.361003000 | 0.371536000  | -0.960124000 |
| O | -2.592932000 | 0.438281000  | 0.988274000  |
| C | -2.255769000 | -0.769363000 | -0.998190000 |
| C | -3.350446000 | -0.364024000 | 0.048565000  |
| C | -2.764830000 | -0.936941000 | -2.420536000 |
| H | -3.523935000 | -1.726382000 | -2.465141000 |
| H | -1.935070000 | -1.222949000 | -3.075114000 |
| H | -3.197402000 | -0.010217000 | -2.805730000 |
| C | -1.458525000 | -1.999338000 | -0.573508000 |
| H | -0.607186000 | -2.126581000 | -1.246873000 |
| H | -2.073427000 | -2.904455000 | -0.617056000 |
| H | -1.066576000 | -1.884533000 | 0.442081000  |
| C | -3.980089000 | -1.527043000 | 0.797025000  |
| H | -4.472941000 | -2.211106000 | 0.097024000  |
| H | -4.733833000 | -1.152087000 | 1.497421000  |
| H | -3.233396000 | -2.085067000 | 1.367051000  |
| C | -4.433200000 | 0.539333000  | -0.541124000 |
| H | -5.037711000 | 0.948526000  | 0.274692000  |
| H | -5.092729000 | -0.014361000 | -1.217509000 |
| H | -3.991114000 | 1.376694000  | -1.091729000 |
| H | 3.009451000  | 0.032599000  | 2.104972000  |

**TS<sub>2NP</sub>/3NP**

E(B3PW91-D3) = -1784.651987 au

E(DLPNO-CCSD(T)) = -1781.627595 au

G<sub>cont</sub> = 0.512019 au

G = -1781.115576 au

|   |             |              |              |
|---|-------------|--------------|--------------|
| P | 1.180377000 | 1.240105000  | -0.477109000 |
| N | 0.257333000 | -2.117441000 | 0.157744000  |
| N | 2.452858000 | 1.413519000  | -1.605925000 |
| N | 2.086073000 | 0.057237000  | 0.343114000  |
| C | 0.646656000 | -1.603476000 | 1.419189000  |

|   |              |              |              |
|---|--------------|--------------|--------------|
| C | 1.594049000  | -0.570115000 | 1.521886000  |
| C | 2.017663000  | -0.115840000 | 2.772979000  |
| C | 1.479771000  | -0.659774000 | 3.936588000  |
| C | 0.505540000  | -1.656209000 | 3.844764000  |
| C | 0.101953000  | -2.126916000 | 2.596790000  |
| H | 2.748281000  | 0.687652000  | 2.815214000  |
| H | 1.805242000  | -0.295157000 | 4.907218000  |
| H | 0.067113000  | -2.076115000 | 4.746527000  |
| H | -0.643753000 | -2.912941000 | 2.515126000  |
| C | 3.608774000  | 0.706480000  | -1.269038000 |
| C | 3.403236000  | -0.066067000 | -0.109685000 |
| C | 4.418777000  | -0.855128000 | 0.411042000  |
| C | 5.657832000  | -0.865567000 | -0.245772000 |
| C | 5.864415000  | -0.101526000 | -1.394051000 |
| C | 4.836146000  | 0.695603000  | -1.919835000 |
| H | 4.246712000  | -1.451919000 | 1.302199000  |
| H | 6.462417000  | -1.480168000 | 0.149215000  |
| H | 6.830416000  | -0.119195000 | -1.891773000 |
| H | 4.996160000  | 1.291013000  | -2.814157000 |
| C | 2.381849000  | 2.287039000  | -2.759741000 |
| H | 2.581913000  | 1.729910000  | -3.682401000 |
| H | 3.103513000  | 3.108954000  | -2.675348000 |
| H | 1.374169000  | 2.710160000  | -2.823037000 |
| C | 1.265911000  | -2.882818000 | -0.569566000 |
| H | 2.126680000  | -2.260001000 | -0.835204000 |
| H | 0.822316000  | -3.273251000 | -1.487771000 |
| H | 1.622414000  | -3.726419000 | 0.035971000  |
| B | -1.073475000 | -2.001565000 | -0.311368000 |
| O | -2.054819000 | -1.290301000 | 0.346979000  |
| O | -1.510350000 | -2.575528000 | -1.491790000 |
| C | -3.155657000 | -1.166001000 | -0.592737000 |
| C | -2.955380000 | -2.429914000 | -1.492922000 |
| C | -4.457624000 | -1.125260000 | 0.188312000  |
| H | -5.314332000 | -1.141753000 | -0.495129000 |
| H | -4.501211000 | -0.199241000 | 0.770653000  |
| H | -4.539768000 | -1.970106000 | 0.876986000  |
| C | -2.956642000 | 0.139229000  | -1.358160000 |
| H | -2.893660000 | 0.965521000  | -0.647533000 |
| H | -3.792315000 | 0.333460000  | -2.038499000 |
| H | -2.030308000 | 0.118997000  | -1.943115000 |
| C | -3.431312000 | -2.273934000 | -2.927199000 |
| H | -4.503823000 | -2.050364000 | -2.950811000 |
| H | -3.263367000 | -3.205554000 | -3.477834000 |
| H | -2.894878000 | -1.472984000 | -3.441466000 |

|   |              |              |              |
|---|--------------|--------------|--------------|
| C | -3.537363000 | -3.698554000 | -0.871106000 |
| H | -3.181529000 | -4.567586000 | -1.433728000 |
| H | -4.631959000 | -3.690714000 | -0.900135000 |
| H | -3.216934000 | -3.809948000 | 0.170384000  |
| C | -0.246786000 | 2.208830000  | 1.209717000  |
| N | 0.884071000  | 2.577880000  | 0.455245000  |
| C | -1.546910000 | 2.696081000  | 0.881997000  |
| C | -1.800077000 | 3.458863000  | -0.287813000 |
| C | -3.093645000 | 3.863698000  | -0.619045000 |
| C | -4.179503000 | 3.535992000  | 0.193848000  |
| C | -3.946237000 | 2.788942000  | 1.360307000  |
| C | -2.666038000 | 2.380840000  | 1.699846000  |
| H | -0.977751000 | 3.720344000  | -0.950085000 |
| H | -3.252822000 | 4.441015000  | -1.528283000 |
| H | -5.185619000 | 3.853463000  | -0.068075000 |
| H | -4.780381000 | 2.521236000  | 2.006543000  |
| H | -2.506280000 | 1.785445000  | 2.597178000  |
| H | -0.121511000 | 0.664768000  | -0.387755000 |
| H | -0.064433000 | 1.674411000  | 2.135238000  |
| H | 1.073618000  | 3.524606000  | 0.140823000  |

### 3NP

E(B3PW91-D3) = -1784.734507 au

E(DLPNO-CCSD(T)) = -1781.720097 au

G<sub>cont</sub> = 0.515183 au

G = -1781.204915 au

|   |              |              |              |
|---|--------------|--------------|--------------|
| P | 1.059127000  | 0.375475000  | -0.934559000 |
| N | 0.002942000  | -2.429177000 | 0.267315000  |
| N | 2.426953000  | 0.861192000  | -1.850202000 |
| N | 2.155213000  | -0.579399000 | 0.086914000  |
| C | 0.522076000  | -1.802526000 | 1.428237000  |
| C | 1.632073000  | -0.933394000 | 1.354491000  |
| C | 2.114985000  | -0.339220000 | 2.529073000  |
| C | 1.512975000  | -0.590721000 | 3.758668000  |
| C | 0.400166000  | -1.431164000 | 3.830090000  |
| C | -0.081430000 | -2.031323000 | 2.669287000  |
| H | 2.952091000  | 0.350091000  | 2.462392000  |
| H | 1.900844000  | -0.113222000 | 4.655136000  |
| H | -0.083900000 | -1.625569000 | 4.783742000  |
| H | -0.940636000 | -2.695690000 | 2.703709000  |
| C | 3.653154000  | 0.567872000  | -1.263094000 |
| C | 3.502708000  | -0.260549000 | -0.129002000 |
| C | 4.621482000  | -0.707236000 | 0.565439000  |

|   |              |              |              |
|---|--------------|--------------|--------------|
| C | 5.896055000  | -0.314534000 | 0.129406000  |
| C | 6.042410000  | 0.511426000  | -0.983720000 |
| C | 4.917510000  | 0.961339000  | -1.691883000 |
| H | 4.506095000  | -1.357407000 | 1.427987000  |
| H | 6.773065000  | -0.663225000 | 0.668716000  |
| H | 7.033828000  | 0.813810000  | -1.311425000 |
| H | 5.031489000  | 1.605498000  | -2.559231000 |
| C | 2.318892000  | 1.669493000  | -3.045103000 |
| H | 2.930024000  | 1.246967000  | -3.852619000 |
| H | 2.639736000  | 2.704959000  | -2.866024000 |
| H | 1.276196000  | 1.685680000  | -3.374988000 |
| C | 0.876647000  | -3.379266000 | -0.414327000 |
| H | 1.788481000  | -2.888748000 | -0.772719000 |
| H | 0.345222000  | -3.802134000 | -1.269305000 |
| H | 1.158594000  | -4.194421000 | 0.264523000  |
| B | -1.296530000 | -2.133476000 | -0.208067000 |
| O | -2.153859000 | -1.236482000 | 0.406409000  |
| O | -1.843873000 | -2.720215000 | -1.333479000 |
| C | -3.272573000 | -1.049901000 | -0.499577000 |
| C | -3.253789000 | -2.384798000 | -1.321541000 |
| C | -4.528543000 | -0.822329000 | 0.325678000  |
| H | -5.410326000 | -0.775954000 | -0.323498000 |
| H | -4.447575000 | 0.130069000  | 0.860078000  |
| H | -4.675620000 | -1.615214000 | 1.063191000  |
| C | -2.977829000 | 0.178931000  | -1.358152000 |
| H | -2.860543000 | 1.055133000  | -0.714329000 |
| H | -3.798984000 | 0.380460000  | -2.053859000 |
| H | -2.052229000 | 0.049944000  | -1.928112000 |
| C | -3.737126000 | -2.257748000 | -2.756538000 |
| H | -4.773035000 | -1.901110000 | -2.781961000 |
| H | -3.699774000 | -3.235995000 | -3.247160000 |
| H | -3.112501000 | -1.566924000 | -3.327934000 |
| C | -3.980394000 | -3.527871000 | -0.613182000 |
| H | -3.754201000 | -4.465907000 | -1.130008000 |
| H | -5.065338000 | -3.380013000 | -0.621363000 |
| H | -3.647961000 | -3.622758000 | 0.426229000  |
| C | -0.440545000 | 1.704236000  | 0.872851000  |
| N | 0.723070000  | 1.758630000  | -0.004933000 |
| C | -1.415444000 | 2.849138000  | 0.709594000  |
| C | -1.371355000 | 3.711006000  | -0.388445000 |
| C | -2.329132000 | 4.716834000  | -0.541500000 |
| C | -3.347411000 | 4.868436000  | 0.400212000  |
| C | -3.399137000 | 4.008571000  | 1.501172000  |
| C | -2.438355000 | 3.010147000  | 1.653712000  |

|   |              |             |              |
|---|--------------|-------------|--------------|
| H | -0.581710000 | 3.582644000 | -1.124044000 |
| H | -2.280098000 | 5.381224000 | -1.401529000 |
| H | -4.094060000 | 5.649854000 | 0.280398000  |
| H | -4.187630000 | 4.118560000 | 2.242373000  |
| H | -2.484511000 | 2.340079000 | 2.511289000  |
| H | -0.977431000 | 0.767448000 | 0.668904000  |
| H | -0.127056000 | 1.624509000 | 1.922138000  |
| H | 1.511395000  | 2.278401000 | 0.369861000  |

**TS<sub>3NP/1NP</sub>**

E(B3PW91-D3) = -1784.70869 au

E(DLPNO-CCSD(T)) = -1781.691684 au

G<sub>cont</sub> = 0.520694512 au

G = -1781.17099 au

|   |              |              |              |
|---|--------------|--------------|--------------|
| P | -0.856722000 | -0.348780000 | 1.420303000  |
| N | 1.096453000  | -1.763224000 | 1.015842000  |
| N | -2.420678000 | 0.429521000  | 1.446168000  |
| N | -1.529077000 | -1.505625000 | 0.242016000  |
| C | 0.606738000  | -2.625375000 | -0.006367000 |
| C | -0.710986000 | -2.409018000 | -0.460085000 |
| C | -1.104722000 | -3.062598000 | -1.642479000 |
| C | -0.268374000 | -3.990323000 | -2.259362000 |
| C | 0.992455000  | -4.278759000 | -1.737999000 |
| C | 1.430348000  | -3.561472000 | -0.627609000 |
| H | -2.048660000 | -2.824192000 | -2.112579000 |
| H | -0.611365000 | -4.481689000 | -3.166807000 |
| H | 1.639196000  | -5.010488000 | -2.214489000 |
| H | 2.441058000  | -3.686940000 | -0.248041000 |
| C | -3.392630000 | -0.167095000 | 0.669273000  |
| C | -2.915564000 | -1.340778000 | 0.038487000  |
| C | -3.836592000 | -2.195901000 | -0.565684000 |
| C | -5.186428000 | -1.819924000 | -0.652027000 |
| C | -5.624896000 | -0.611104000 | -0.121562000 |
| C | -4.726036000 | 0.221669000  | 0.557789000  |
| H | -3.540312000 | -3.167552000 | -0.938552000 |
| H | -5.887839000 | -2.491636000 | -1.140006000 |
| H | -6.668272000 | -0.318618000 | -0.208283000 |
| H | -5.064046000 | 1.147209000  | 1.015002000  |
| C | -2.760437000 | 1.391069000  | 2.471325000  |
| H | -3.683753000 | 1.099668000  | 2.990018000  |
| H | -2.891596000 | 2.400169000  | 2.057842000  |
| H | -1.949829000 | 1.425279000  | 3.208161000  |
| C | 1.427586000  | -2.378728000 | 2.298535000  |

|   |              |              |              |
|---|--------------|--------------|--------------|
| H | 0.567338000  | -2.949890000 | 2.664813000  |
| H | 1.658572000  | -1.591684000 | 3.020467000  |
| H | 2.292992000  | -3.052348000 | 2.224776000  |
| B | 1.925153000  | -0.650342000 | 0.514541000  |
| O | 2.441604000  | -0.682872000 | -0.774841000 |
| O | 2.675981000  | 0.150755000  | 1.366784000  |
| C | 3.514927000  | 0.275650000  | -0.844424000 |
| C | 3.907248000  | 0.455904000  | 0.670117000  |
| C | 4.621783000  | -0.313917000 | -1.710094000 |
| H | 5.502795000  | 0.338239000  | -1.708736000 |
| H | 4.268348000  | -0.408621000 | -2.742141000 |
| H | 4.917586000  | -1.306942000 | -1.363776000 |
| C | 2.982739000  | 1.545286000  | -1.506554000 |
| H | 2.183963000  | 2.006425000  | -0.925342000 |
| H | 2.570298000  | 1.283456000  | -2.486283000 |
| H | 3.777742000  | 2.284223000  | -1.653255000 |
| C | 4.358541000  | 1.858394000  | 1.044261000  |
| H | 5.262491000  | 2.130536000  | 0.487678000  |
| H | 4.588512000  | 1.900620000  | 2.114047000  |
| H | 3.586780000  | 2.602974000  | 0.833833000  |
| C | 4.936382000  | -0.571114000 | 1.145836000  |
| H | 5.019579000  | -0.506184000 | 2.235492000  |
| H | 5.925063000  | -0.392114000 | 0.710698000  |
| H | 4.619020000  | -1.588141000 | 0.891567000  |
| C | 0.264601000  | 2.022500000  | 0.776939000  |
| N | 0.109003000  | 0.636531000  | 0.320874000  |
| C | -0.355850000 | 3.057525000  | -0.130596000 |
| C | -1.621934000 | 2.868463000  | -0.700471000 |
| C | -2.188003000 | 3.849219000  | -1.514676000 |
| C | -1.497569000 | 5.035496000  | -1.772750000 |
| C | -0.235130000 | 5.232246000  | -1.210851000 |
| C | 0.330023000  | 4.247701000  | -0.398866000 |
| H | -2.170251000 | 1.951454000  | -0.502390000 |
| H | -3.171688000 | 3.684691000  | -1.948206000 |
| H | -1.937974000 | 5.797982000  | -2.410550000 |
| H | 0.315125000  | 6.148662000  | -1.410901000 |
| H | 1.318864000  | 4.404253000  | 0.028628000  |
| H | 1.329675000  | 2.232978000  | 0.922627000  |
| H | -0.175796000 | 2.110864000  | 1.781073000  |
| H | -0.178458000 | 0.577190000  | -0.654126000 |

**TS<sub>2NP/1NP</sub>**

E(B3PW91-D3) = -1784.684771 au

E(DLPNO-CCSD(T)) = -1781.658904 au

G<sub>cont</sub> = 0.517765 au

G = -1781.141139 au

|   |              |              |              |
|---|--------------|--------------|--------------|
| P | 0.869718000  | 0.577053000  | 1.856618000  |
| N | -1.429864000 | 0.874572000  | 1.029831000  |
| N | 2.580090000  | 0.269843000  | 1.854721000  |
| N | 1.096694000  | 1.459461000  | 0.382893000  |
| C | -1.212012000 | 2.092011000  | 0.327263000  |
| C | 0.116179000  | 2.392317000  | -0.022913000 |
| C | 0.425271000  | 3.599392000  | -0.658653000 |
| C | -0.596727000 | 4.486805000  | -0.992044000 |
| C | -1.921883000 | 4.184588000  | -0.674369000 |
| C | -2.222002000 | 2.995485000  | -0.011343000 |
| H | 1.458412000  | 3.862588000  | -0.858980000 |
| H | -0.349698000 | 5.422708000  | -1.486876000 |
| H | -2.719804000 | 4.873992000  | -0.938602000 |
| H | -3.249158000 | 2.743844000  | 0.230428000  |
| C | 3.223630000  | 0.594754000  | 0.677312000  |
| C | 2.366701000  | 1.308981000  | -0.188452000 |
| C | 2.804813000  | 1.688996000  | -1.454621000 |
| C | 4.115316000  | 1.380688000  | -1.832935000 |
| C | 4.971196000  | 0.699326000  | -0.964579000 |
| C | 4.529217000  | 0.288041000  | 0.294701000  |
| H | 2.136421000  | 2.186225000  | -2.149128000 |
| H | 4.462484000  | 1.669810000  | -2.821408000 |
| H | 5.985289000  | 0.464082000  | -1.276989000 |
| H | 5.179293000  | -0.275516000 | 0.956792000  |
| C | 3.240008000  | -0.466520000 | 2.912660000  |
| H | 4.107827000  | 0.092773000  | 3.283299000  |
| H | 3.573562000  | -1.451681000 | 2.565682000  |
| H | 2.540131000  | -0.606366000 | 3.742001000  |
| C | -2.224682000 | 1.055016000  | 2.248847000  |
| H | -1.773993000 | 1.828154000  | 2.882045000  |
| H | -2.245929000 | 0.108462000  | 2.793124000  |
| H | -3.261906000 | 1.344285000  | 2.040432000  |
| B | -1.969791000 | -0.284567000 | 0.067700000  |
| O | -2.982016000 | 0.188318000  | -0.848577000 |
| O | -2.551326000 | -1.377724000 | 0.822994000  |
| C | -3.882096000 | -0.899392000 | -1.060560000 |
| C | -3.871694000 | -1.626766000 | 0.333124000  |
| C | -5.239375000 | -0.337956000 | -1.468720000 |
| H | -5.990530000 | -1.134904000 | -1.527049000 |
| H | -5.162390000 | 0.130956000  | -2.456101000 |
| H | -5.586530000 | 0.420892000  | -0.762680000 |

|   |              |              |              |
|---|--------------|--------------|--------------|
| C | -3.347423000 | -1.785432000 | -2.193717000 |
| H | -2.385205000 | -2.232360000 | -1.929910000 |
| H | -3.195935000 | -1.160997000 | -3.081229000 |
| H | -4.053060000 | -2.583892000 | -2.450484000 |
| C | -4.089861000 | -3.134566000 | 0.258725000  |
| H | -5.055071000 | -3.369407000 | -0.206123000 |
| H | -4.086863000 | -3.558517000 | 1.269585000  |
| H | -3.296567000 | -3.622324000 | -0.313892000 |
| C | -4.878018000 | -1.022216000 | 1.316203000  |
| H | -4.658153000 | -1.395827000 | 2.322125000  |
| H | -5.908444000 | -1.296283000 | 1.062149000  |
| H | -4.804343000 | 0.068009000  | 1.335351000  |
| C | 0.121778000  | -1.590322000 | 0.081187000  |
| N | -0.685277000 | -0.814855000 | -0.667695000 |
| C | 1.448764000  | -2.078992000 | -0.371516000 |
| C | 2.183515000  | -2.894730000 | 0.499964000  |
| C | 3.453147000  | -3.345109000 | 0.150940000  |
| C | 4.002892000  | -2.988621000 | -1.082068000 |
| C | 3.271373000  | -2.189103000 | -1.962068000 |
| C | 2.002539000  | -1.736644000 | -1.610272000 |
| H | 1.756380000  | -3.162494000 | 1.464943000  |
| H | 4.014526000  | -3.972018000 | 0.839565000  |
| H | 4.997543000  | -3.331259000 | -1.356083000 |
| H | 3.695118000  | -1.905980000 | -2.921509000 |
| H | 1.450087000  | -1.109403000 | -2.304090000 |
| H | -0.439859000 | -2.293100000 | 0.703017000  |
| H | 0.484190000  | -0.828643000 | 1.172316000  |
| H | -0.222801000 | -0.186853000 | -1.315632000 |

### Acr<sup>Dipp</sup>-1NP

E(B3PW91-D3) = -1940.428670 au

E(DLPNO-CCSD(T)) = -1936.989568 au

G<sub>cont</sub> = 0.637862 au

G = -1936.351706 au

|   |              |              |              |
|---|--------------|--------------|--------------|
| P | 0.030726000  | -0.132660000 | 0.072128000  |
| N | 0.005938000  | 1.587040000  | -0.132450000 |
| N | 1.899187000  | 0.157622000  | 0.037974000  |
| N | -1.849375000 | 0.096782000  | -0.048132000 |
| C | 1.183096000  | 2.293125000  | -0.208938000 |
| C | 2.303098000  | 1.449013000  | -0.117955000 |
| C | 3.584133000  | 2.021300000  | -0.198790000 |
| H | 4.469934000  | 1.396258000  | -0.133346000 |
| H | 4.652830000  | 3.863695000  | -0.424275000 |



|   |              |              |              |
|---|--------------|--------------|--------------|
| C | 3.670767000  | 3.400971000  | -0.361696000 |
| C | 2.528359000  | 4.222090000  | -0.448728000 |
| H | 2.649283000  | 5.295501000  | -0.576669000 |
| C | 1.247710000  | 3.677302000  | -0.373408000 |
| C | -1.189454000 | 2.256427000  | -0.250300000 |
| C | -1.289759000 | 3.639402000  | -0.408691000 |
| C | -2.582867000 | 4.149073000  | -0.510893000 |
| H | -2.731021000 | 5.219453000  | -0.635313000 |
| C | -3.702836000 | 3.295482000  | -0.451414000 |
| C | -3.580180000 | 1.917899000  | -0.297804000 |
| H | -4.449882000 | 1.268904000  | -0.254894000 |
| H | -4.696474000 | 3.730353000  | -0.529183000 |
| C | -2.285632000 | 1.377994000  | -0.201031000 |
| C | -0.032445000 | 4.488513000  | -0.451001000 |
| H | -0.028894000 | 5.092691000  | -1.368457000 |
| H | -0.054708000 | 5.211140000  | 0.377090000  |
| C | 2.820426000  | -0.917709000 | 0.133284000  |
| C | 3.300619000  | -1.300517000 | 1.401544000  |
| C | 4.162418000  | -2.399819000 | 1.475518000  |
| H | 4.541527000  | -2.719016000 | 2.443676000  |
| C | 4.534859000  | -3.098017000 | 0.329528000  |
| H | 5.200681000  | -3.954609000 | 0.406903000  |
| C | 4.054799000  | -2.699695000 | -0.916058000 |
| H | 4.349551000  | -3.253462000 | -1.804248000 |
| C | 3.194861000  | -1.603792000 | -1.040354000 |
| C | 2.891179000  | -0.559537000 | 2.661095000  |
| H | 2.281998000  | 0.299206000  | 2.360569000  |
| C | 2.018835000  | -1.448010000 | 3.556967000  |
| H | 2.576157000  | -2.324536000 | 3.909745000  |
| H | 1.674494000  | -0.890271000 | 4.436051000  |
| H | 1.138934000  | -1.805182000 | 3.010893000  |
| C | 4.106288000  | -0.016078000 | 3.422369000  |
| H | 4.717245000  | 0.627491000  | 2.779409000  |
| H | 3.780711000  | 0.574673000  | 4.286672000  |
| H | 4.745049000  | -0.825773000 | 3.795227000  |
| C | 2.665613000  | -1.188658000 | -2.401353000 |
| H | 2.167961000  | -0.220027000 | -2.284311000 |
| C | 3.787110000  | -1.002864000 | -3.429851000 |
| H | 3.377031000  | -0.613550000 | -4.369047000 |
| H | 4.542164000  | -0.296167000 | -3.067598000 |
| H | 4.291586000  | -1.949106000 | -3.658855000 |
| C | 1.612802000  | -2.188281000 | -2.897900000 |
| H | 0.792852000  | -2.281568000 | -2.177818000 |
| H | 1.190410000  | -1.862756000 | -3.856134000 |

|   |              |              |              |
|---|--------------|--------------|--------------|
| H | 2.052458000  | -3.183299000 | -3.040533000 |
| C | -2.743876000 | -0.997706000 | 0.075247000  |
| C | -3.316230000 | -1.274344000 | 1.333523000  |
| C | -4.189550000 | -2.362266000 | 1.437899000  |
| H | -4.643877000 | -2.593939000 | 2.398609000  |
| C | -4.478770000 | -3.157051000 | 0.332936000  |
| H | -5.159293000 | -3.999829000 | 0.431347000  |
| C | -3.889545000 | -2.879147000 | -0.898969000 |
| H | -4.120139000 | -3.512260000 | -1.751191000 |
| C | -3.010561000 | -1.802738000 | -1.054743000 |
| C | -2.995996000 | -0.435528000 | 2.557797000  |
| H | -2.319566000 | 0.367817000  | 2.249189000  |
| C | -4.253962000 | 0.221129000  | 3.139628000  |
| H | -4.966246000 | -0.528610000 | 3.504921000  |
| H | -3.990247000 | 0.869552000  | 3.983471000  |
| H | -4.762448000 | 0.832774000  | 2.386237000  |
| C | -2.259898000 | -1.267916000 | 3.615483000  |
| H | -2.890670000 | -2.081720000 | 3.993496000  |
| H | -1.349961000 | -1.712426000 | 3.198306000  |
| H | -1.974796000 | -0.639899000 | 4.467973000  |
| C | -2.408974000 | -1.474912000 | -2.410875000 |
| H | -1.466872000 | -0.943959000 | -2.234016000 |
| C | -3.333259000 | -0.523996000 | -3.186969000 |
| H | -3.516227000 | 0.398628000  | -2.626869000 |
| H | -2.887090000 | -0.254670000 | -4.152054000 |
| H | -4.301570000 | -1.002809000 | -3.380104000 |
| C | -2.081994000 | -2.714166000 | -3.248555000 |
| H | -2.987717000 | -3.224337000 | -3.598008000 |
| H | -1.511729000 | -2.421479000 | -4.137144000 |
| H | -1.481680000 | -3.434916000 | -2.682649000 |

**Acr<sup>DiPP</sup>-TS<sub>1NP/2N'P</sub>**

E(B3PW91-D3) = -2352.145575 au

E(DLPNO-CCSD(T)) = -2347.998944 au

G<sub>cont</sub> = 0.824469 au

G = -2347.174475 au

|   |              |              |              |
|---|--------------|--------------|--------------|
| P | 0.268238000  | 0.494812000  | -0.406385000 |
| N | -1.346744000 | 1.258626000  | 0.048630000  |
| N | -0.292867000 | -0.739177000 | 0.970684000  |
| N | 1.920701000  | -0.034034000 | 0.170376000  |
| C | 0.778868000  | -1.211574000 | 1.784522000  |
| C | 2.028297000  | -0.872540000 | 1.274120000  |
| C | 3.164173000  | -1.347132000 | 1.931288000  |

|   |              |              |              |
|---|--------------|--------------|--------------|
| H | 4.154918000  | -1.135559000 | 1.540360000  |
| C | 2.987060000  | -2.060729000 | 3.124300000  |
| C | 1.721285000  | -2.272762000 | 3.677488000  |
| H | 1.622149000  | -2.779461000 | 4.634464000  |
| C | 0.572493000  | -1.831470000 | 3.001815000  |
| C | -1.393001000 | -0.286158000 | 1.750594000  |
| C | -1.725561000 | -0.848103000 | 2.966939000  |
| C | -2.862619000 | -0.319035000 | 3.600066000  |
| H | -3.184398000 | -0.723400000 | 4.556791000  |
| C | -3.577946000 | 0.722861000  | 3.003488000  |
| C | -3.168640000 | 1.313747000  | 1.798987000  |
| H | -3.715151000 | 2.144432000  | 1.363245000  |
| C | -2.025302000 | 0.814229000  | 1.176869000  |
| C | -0.842130000 | -1.944066000 | 3.531493000  |
| H | 3.864510000  | -2.428476000 | 3.650626000  |
| H | -4.466228000 | 1.106860000  | 3.499306000  |
| H | -1.254285000 | -2.930650000 | 3.277425000  |
| H | -0.836447000 | -1.893049000 | 4.626379000  |
| C | 3.080739000  | 0.289745000  | -0.596815000 |
| C | 3.512295000  | -0.638256000 | -1.567150000 |
| C | 4.674881000  | -0.351932000 | -2.290303000 |
| H | 5.022121000  | -1.052629000 | -3.045809000 |
| C | 5.386886000  | 0.819592000  | -2.061321000 |
| H | 6.291047000  | 1.028795000  | -2.628585000 |
| C | 4.934391000  | 1.735345000  | -1.114214000 |
| H | 5.496012000  | 2.651470000  | -0.962131000 |
| C | 3.775322000  | 1.499048000  | -0.366682000 |
| C | 2.736842000  | -1.908762000 | -1.865892000 |
| H | 1.934120000  | -2.013736000 | -1.132523000 |
| C | 2.084862000  | -1.809711000 | -3.251629000 |
| H | 2.840680000  | -1.688198000 | -4.037272000 |
| H | 1.509414000  | -2.714348000 | -3.473044000 |
| H | 1.404384000  | -0.952025000 | -3.303097000 |
| C | 3.607931000  | -3.163748000 | -1.742108000 |
| H | 4.074384000  | -3.219541000 | -0.752144000 |
| H | 2.992635000  | -4.060798000 | -1.878573000 |
| H | 4.403925000  | -3.188435000 | -2.496092000 |
| C | 3.300913000  | 2.511187000  | 0.665569000  |
| H | 2.203447000  | 2.494008000  | 0.661516000  |
| C | 3.758656000  | 2.130876000  | 2.081733000  |
| H | 3.415422000  | 2.880680000  | 2.804819000  |
| H | 3.366612000  | 1.159317000  | 2.390669000  |
| H | 4.853989000  | 2.087028000  | 2.130093000  |
| C | 3.744645000  | 3.942431000  | 0.349156000  |

|   |              |              |              |
|---|--------------|--------------|--------------|
| H | 3.477910000  | 4.237602000  | -0.671867000 |
| H | 3.266624000  | 4.641866000  | 1.041441000  |
| H | 4.827646000  | 4.065570000  | 0.468900000  |
| C | -1.836987000 | 2.369906000  | -0.700523000 |
| C | -2.533779000 | 2.120298000  | -1.903013000 |
| C | -2.984752000 | 3.216808000  | -2.644725000 |
| H | -3.508827000 | 3.048139000  | -3.582215000 |
| C | -2.781904000 | 4.519697000  | -2.197941000 |
| H | -3.146400000 | 5.360045000  | -2.784561000 |
| C | -2.113977000 | 4.745998000  | -0.997888000 |
| H | -1.962714000 | 5.766914000  | -0.655133000 |
| C | -1.622636000 | 3.683290000  | -0.231793000 |
| C | -2.790954000 | 0.706875000  | -2.388741000 |
| H | -2.575614000 | 0.021651000  | -1.567316000 |
| C | -4.255756000 | 0.477166000  | -2.777232000 |
| H | -4.545268000 | 1.049671000  | -3.667004000 |
| H | -4.416265000 | -0.583859000 | -3.001319000 |
| H | -4.929957000 | 0.756946000  | -1.959791000 |
| C | -1.853025000 | 0.344473000  | -3.547972000 |
| H | -2.043590000 | 0.978324000  | -4.423698000 |
| H | -0.803255000 | 0.473453000  | -3.261937000 |
| H | -1.999825000 | -0.701428000 | -3.844260000 |
| C | -0.867076000 | 3.973814000  | 1.052244000  |
| H | -0.521346000 | 3.020522000  | 1.466564000  |
| C | -1.758498000 | 4.644591000  | 2.105801000  |
| H | -2.625654000 | 4.024185000  | 2.350911000  |
| H | -1.192010000 | 4.814362000  | 3.029113000  |
| H | -2.123597000 | 5.616856000  | 1.753175000  |
| C | 0.370913000  | 4.833126000  | 0.771261000  |
| H | 0.091741000  | 5.843976000  | 0.450955000  |
| H | 0.981940000  | 4.927648000  | 1.676144000  |
| H | 0.986652000  | 4.392039000  | -0.017911000 |
| B | -0.734207000 | -1.760824000 | -0.261047000 |
| O | -0.184684000 | -3.050258000 | -0.089461000 |
| O | -2.128945000 | -1.835335000 | -0.476061000 |
| C | -1.124033000 | -3.948305000 | -0.714006000 |
| C | -2.498018000 | -3.225665000 | -0.471599000 |
| C | -0.997110000 | -5.310888000 | -0.050696000 |
| H | -1.768191000 | -5.994351000 | -0.424585000 |
| H | -0.016466000 | -5.742548000 | -0.277365000 |
| H | -1.090102000 | -5.235343000 | 1.035542000  |
| C | -0.765531000 | -4.050164000 | -2.197126000 |
| H | 0.273060000  | -4.384120000 | -2.283234000 |
| H | -1.404922000 | -4.768935000 | -2.720400000 |

|   |              |              |              |
|---|--------------|--------------|--------------|
| H | -0.851985000 | -3.077650000 | -2.692601000 |
| C | -3.533235000 | -3.449857000 | -1.565383000 |
| H | -3.768687000 | -4.515830000 | -1.666347000 |
| H | -4.455960000 | -2.917272000 | -1.311733000 |
| H | -3.182018000 | -3.072440000 | -2.528965000 |
| C | -3.106786000 | -3.540356000 | 0.892806000  |
| H | -3.921369000 | -2.835982000 | 1.088310000  |
| H | -3.504771000 | -4.560245000 | 0.935215000  |
| H | -2.364341000 | -3.421053000 | 1.683963000  |
| H | -0.200035000 | -1.075553000 | -1.241754000 |

**Acr<sup>Dipp</sup>-2N<sup>P</sup>**

E(B3PW91-D3) = -2352.188494 au

E(DLPNO-CCSD(T)) = -2348.049008 au

G<sub>cont</sub> = 0.8295503 au

G = -2347.219458 au

|   |              |              |              |
|---|--------------|--------------|--------------|
| P | -0.740173000 | 0.007057000  | -0.932773000 |
| N | -0.703140000 | -1.505076000 | -0.016381000 |
| N | 1.280530000  | 0.105138000  | 1.146489000  |
| N | -0.916960000 | 1.485929000  | 0.015856000  |
| C | 0.700039000  | 1.199103000  | 1.830415000  |
| C | -0.358264000 | 1.892845000  | 1.247396000  |
| C | -0.904728000 | 2.948853000  | 2.006926000  |
| H | -1.679158000 | 3.577439000  | 1.579171000  |
| C | -0.491522000 | 3.154138000  | 3.320751000  |
| C | 0.419513000  | 2.291782000  | 3.949580000  |
| H | 0.639552000  | 2.396565000  | 5.009362000  |
| C | 1.003979000  | 1.278541000  | 3.197429000  |
| C | 0.862433000  | -1.072606000 | 1.806771000  |
| C | 1.197789000  | -1.174349000 | 3.158546000  |
| C | 0.827966000  | -2.327722000 | 3.844027000  |
| H | 1.075873000  | -2.460062000 | 4.894471000  |
| C | 0.116931000  | -3.315197000 | 3.145611000  |
| C | -0.340666000 | -3.114514000 | 1.842823000  |
| H | -0.947611000 | -3.875186000 | 1.363853000  |
| C | -0.052734000 | -1.907653000 | 1.171815000  |
| C | 1.809504000  | 0.098981000  | 3.735081000  |
| H | -0.939950000 | 3.966379000  | 3.888039000  |
| H | -0.139830000 | -4.245352000 | 3.647398000  |
| H | 2.858124000  | 0.182927000  | 3.410814000  |
| H | 1.805737000  | 0.082803000  | 4.828961000  |
| C | -1.556818000 | 2.549354000  | -0.731738000 |
| C | -0.727887000 | 3.554348000  | -1.280629000 |

|   |              |              |              |
|---|--------------|--------------|--------------|
| C | -1.331653000 | 4.676231000  | -1.859053000 |
| H | -0.708398000 | 5.470387000  | -2.262386000 |
| C | -2.713130000 | 4.790725000  | -1.926129000 |
| H | -3.169844000 | 5.669219000  | -2.376339000 |
| C | -3.515436000 | 3.768699000  | -1.426181000 |
| H | -4.592054000 | 3.870235000  | -1.505071000 |
| C | -2.966605000 | 2.634443000  | -0.817011000 |
| C | 0.789221000  | 3.482328000  | -1.245335000 |
| H | 1.090880000  | 2.498113000  | -0.879972000 |
| C | 1.387081000  | 3.645932000  | -2.648071000 |
| H | 1.148555000  | 4.622741000  | -3.084322000 |
| H | 2.479438000  | 3.573853000  | -2.598052000 |
| H | 1.018249000  | 2.872921000  | -3.331982000 |
| C | 1.382228000  | 4.524424000  | -0.287112000 |
| H | 0.974408000  | 4.413631000  | 0.722151000  |
| H | 2.470056000  | 4.402025000  | -0.229174000 |
| H | 1.170379000  | 5.544272000  | -0.632721000 |
| C | -3.875086000 | 1.541388000  | -0.272492000 |
| H | -3.454388000 | 0.586604000  | -0.614375000 |
| C | -3.903530000 | 1.511133000  | 1.262441000  |
| H | -4.589083000 | 0.729555000  | 1.610758000  |
| H | -2.919014000 | 1.306446000  | 1.687090000  |
| H | -4.254907000 | 2.471187000  | 1.660229000  |
| C | -5.305652000 | 1.633592000  | -0.811463000 |
| H | -5.331390000 | 1.651498000  | -1.906974000 |
| H | -5.888772000 | 0.772473000  | -0.477407000 |
| H | -5.819436000 | 2.528367000  | -0.439354000 |
| C | -1.309257000 | -2.586988000 | -0.760445000 |
| C | -0.477270000 | -3.345469000 | -1.611730000 |
| C | -1.029773000 | -4.445975000 | -2.274682000 |
| H | -0.405994000 | -5.040672000 | -2.937813000 |
| C | -2.361667000 | -4.800113000 | -2.086662000 |
| H | -2.774878000 | -5.664522000 | -2.601490000 |
| C | -3.163537000 | -4.049163000 | -1.232809000 |
| H | -4.198440000 | -4.344747000 | -1.082169000 |
| C | -2.661573000 | -2.931104000 | -0.556473000 |
| C | 0.997190000  | -3.029852000 | -1.799062000 |
| H | 1.250623000  | -2.156755000 | -1.191841000 |
| C | 1.873495000  | -4.180808000 | -1.289340000 |
| H | 1.722476000  | -5.094664000 | -1.876835000 |
| H | 2.931965000  | -3.906750000 | -1.353134000 |
| H | 1.645003000  | -4.404847000 | -0.241672000 |
| C | 1.309312000  | -2.685628000 | -3.260410000 |
| H | 1.086792000  | -3.525872000 | -3.928809000 |

|   |              |              |              |
|---|--------------|--------------|--------------|
| H | 0.721108000  | -1.823946000 | -3.597098000 |
| H | 2.371292000  | -2.442626000 | -3.380635000 |
| C | -3.571814000 | -2.160030000 | 0.382384000  |
| H | -3.066034000 | -1.225990000 | 0.649466000  |
| C | -3.838440000 | -2.928247000 | 1.685927000  |
| H | -2.918809000 | -3.100486000 | 2.250270000  |
| H | -4.523126000 | -2.356974000 | 2.324238000  |
| H | -4.302281000 | -3.900480000 | 1.477216000  |
| C | -4.904555000 | -1.815755000 | -0.291068000 |
| H | -5.497893000 | -2.715299000 | -0.491249000 |
| H | -5.502213000 | -1.178748000 | 0.368610000  |
| H | -4.756402000 | -1.292528000 | -1.241091000 |
| B | 2.479406000  | 0.112784000  | 0.387864000  |
| O | 3.034540000  | 1.234500000  | -0.181950000 |
| O | 3.189386000  | -1.044091000 | 0.141570000  |
| C | 4.090660000  | 0.749642000  | -1.058387000 |
| C | 4.469370000  | -0.610025000 | -0.386658000 |
| C | 5.200304000  | 1.784861000  | -1.095823000 |
| H | 6.057737000  | 1.406335000  | -1.663480000 |
| H | 4.839434000  | 2.694796000  | -1.586305000 |
| H | 5.532992000  | 2.051092000  | -0.089571000 |
| C | 3.483057000  | 0.553539000  | -2.444873000 |
| H | 3.036365000  | 1.490555000  | -2.780844000 |
| H | 4.243908000  | 0.252262000  | -3.172264000 |
| H | 2.697589000  | -0.208266000 | -2.426366000 |
| C | 4.997978000  | -1.670296000 | -1.336341000 |
| H | 5.913719000  | -1.321616000 | -1.826738000 |
| H | 5.233435000  | -2.582043000 | -0.778114000 |
| H | 4.263895000  | -1.923610000 | -2.103523000 |
| C | 5.412988000  | -0.442287000 | 0.803773000  |
| H | 5.455325000  | -1.384764000 | 1.358486000  |
| H | 6.425936000  | -0.185089000 | 0.477019000  |
| H | 5.057382000  | 0.339174000  | 1.484086000  |
| H | 0.636187000  | 0.116453000  | -1.259260000 |

**Acr<sup>Dipp</sup>-TS<sub>1NP/2PP</sub>**

E(B3PW91-D3) = -2352.20523 au

E(DLPNO-CCSD(T)) = -2347.944797 au

G<sub>cont</sub> = 0.821098 au

G = -2347.123699 au

|   |             |              |              |
|---|-------------|--------------|--------------|
| P | 0.192097000 | 0.425546000  | -0.005993000 |
| N | 1.760278000 | -0.487692000 | 0.305699000  |
| N | 0.157071000 | -0.476341000 | -1.519936000 |

|   |              |              |              |
|---|--------------|--------------|--------------|
| N | -1.341318000 | 1.181971000  | -0.644096000 |
| C | -1.062480000 | -0.503038000 | -2.170924000 |
| C | -1.932024000 | 0.490686000  | -1.691041000 |
| C | -3.194154000 | 0.590291000  | -2.271101000 |
| H | -3.890254000 | 1.360144000  | -1.953112000 |
| C | -3.545894000 | -0.340536000 | -3.264696000 |
| C | -2.683491000 | -1.366263000 | -3.663558000 |
| H | -3.006878000 | -2.087164000 | -4.411575000 |
| C | -1.397306000 | -1.467592000 | -3.107011000 |
| C | 0.919172000  | -1.629090000 | -1.518105000 |
| C | 0.723253000  | -2.665094000 | -2.421085000 |
| C | 1.598578000  | -3.755427000 | -2.299070000 |
| H | 1.502451000  | -4.601027000 | -2.976994000 |
| C | 2.593125000  | -3.764675000 | -1.313751000 |
| C | 2.738398000  | -2.715972000 | -0.391709000 |
| H | 3.502826000  | -2.745500000 | 0.379837000  |
| C | 1.876052000  | -1.627809000 | -0.489019000 |
| C | -0.368066000 | -2.527109000 | -3.472213000 |
| H | -4.528036000 | -0.265004000 | -3.725919000 |
| H | 3.265752000  | -4.616654000 | -1.249475000 |
| H | -0.865651000 | -3.493985000 | -3.622912000 |
| H | 0.091152000  | -2.275097000 | -4.441587000 |
| C | -1.793129000 | 2.433833000  | -0.150658000 |
| C | -2.974990000 | 2.511350000  | 0.619114000  |
| C | -3.423113000 | 3.769421000  | 1.036936000  |
| H | -4.334645000 | 3.844057000  | 1.625036000  |
| C | -2.706771000 | 4.923723000  | 0.739650000  |
| H | -3.067135000 | 5.893338000  | 1.075876000  |
| C | -1.515176000 | 4.829373000  | 0.027178000  |
| H | -0.946582000 | 5.732773000  | -0.180497000 |
| C | -1.037659000 | 3.597888000  | -0.432043000 |
| C | -3.710083000 | 1.268869000  | 1.086540000  |
| H | -3.318465000 | 0.408054000  | 0.540056000  |
| C | -3.415988000 | 1.048606000  | 2.578670000  |
| H | -3.713889000 | 1.922718000  | 3.170247000  |
| H | -3.966268000 | 0.182280000  | 2.959719000  |
| H | -2.345794000 | 0.880948000  | 2.752649000  |
| C | -5.221819000 | 1.328250000  | 0.840811000  |
| H | -5.450590000 | 1.540946000  | -0.208848000 |
| H | -5.681093000 | 0.366529000  | 1.098292000  |
| H | -5.707984000 | 2.097207000  | 1.453084000  |
| C | 0.287281000  | 3.558409000  | -1.173729000 |
| H | 0.457636000  | 2.529926000  | -1.513708000 |
| C | 0.275676000  | 4.442105000  | -2.426980000 |



|   |              |              |              |
|---|--------------|--------------|--------------|
| H | 1.217831000  | 4.331659000  | -2.976676000 |
| H | -0.546252000 | 4.165119000  | -3.096335000 |
| H | 0.163080000  | 5.502853000  | -2.173101000 |
| C | 1.434766000  | 3.941518000  | -0.226248000 |
| H | 1.488155000  | 3.252888000  | 0.624212000  |
| H | 2.399778000  | 3.907788000  | -0.743006000 |
| H | 1.299377000  | 4.958086000  | 0.162529000  |
| C | 2.886789000  | 0.274715000  | 0.729729000  |
| C | 3.028433000  | 0.563661000  | 2.104228000  |
| C | 4.089483000  | 1.378067000  | 2.516073000  |
| H | 4.199443000  | 1.618148000  | 3.571233000  |
| C | 5.009162000  | 1.876779000  | 1.600291000  |
| H | 5.832494000  | 2.503462000  | 1.935744000  |
| C | 4.868875000  | 1.570676000  | 0.248825000  |
| H | 5.590779000  | 1.965182000  | -0.462680000 |
| C | 3.807450000  | 0.789778000  | -0.217561000 |
| C | 2.065023000  | 0.010635000  | 3.136440000  |
| H | 1.398108000  | -0.682273000 | 2.618742000  |
| C | 2.788534000  | -0.801705000 | 4.217710000  |
| H | 3.455035000  | -0.175089000 | 4.822824000  |
| H | 2.059531000  | -1.261579000 | 4.895954000  |
| H | 3.390881000  | -1.601041000 | 3.771300000  |
| C | 1.214554000  | 1.123068000  | 3.764869000  |
| H | 1.836937000  | 1.818820000  | 4.341729000  |
| H | 0.692166000  | 1.707049000  | 2.998123000  |
| H | 0.465755000  | 0.698181000  | 4.444960000  |
| C | 3.697796000  | 0.521840000  | -1.711097000 |
| H | 2.754154000  | 0.009997000  | -1.904978000 |
| C | 4.828599000  | -0.403984000 | -2.180233000 |
| H | 4.828914000  | -1.340874000 | -1.613977000 |
| H | 4.708652000  | -0.648734000 | -3.242393000 |
| H | 5.807254000  | 0.074752000  | -2.051214000 |
| C | 3.665281000  | 1.808484000  | -2.544351000 |
| H | 4.581833000  | 2.399100000  | -2.431282000 |
| H | 3.558906000  | 1.561003000  | -3.607226000 |
| H | 2.818268000  | 2.438652000  | -2.260200000 |
| B | -0.846598000 | -1.177825000 | 1.038280000  |
| O | -2.030104000 | -1.541213000 | 0.498867000  |
| O | -0.294641000 | -2.062108000 | 1.900910000  |
| C | -2.402233000 | -2.829275000 | 1.091242000  |
| C | -1.059932000 | -3.309743000 | 1.769777000  |
| C | -2.901109000 | -3.714044000 | -0.039198000 |
| H | -3.135076000 | -4.717783000 | 0.332230000  |
| H | -3.811994000 | -3.280332000 | -0.463271000 |

|   |              |              |              |
|---|--------------|--------------|--------------|
| H | -2.163065000 | -3.792601000 | -0.840481000 |
| C | -3.521800000 | -2.539987000 | 2.081679000  |
| H | -4.337386000 | -2.030588000 | 1.559663000  |
| H | -3.910751000 | -3.466542000 | 2.516256000  |
| H | -3.177809000 | -1.891000000 | 2.890478000  |
| C | -1.220816000 | -3.905631000 | 3.158324000  |
| H | -1.840142000 | -4.808300000 | 3.114694000  |
| H | -0.237501000 | -4.184783000 | 3.549390000  |
| H | -1.676507000 | -3.200201000 | 3.856844000  |
| C | -0.224457000 | -4.231388000 | 0.891449000  |
| H | 0.757769000  | -4.370127000 | 1.351040000  |
| H | -0.703563000 | -5.210379000 | 0.786286000  |
| H | -0.062480000 | -3.806535000 | -0.101431000 |
| H | -0.284581000 | 0.366481000  | 1.377523000  |

### Acr<sup>Dipp</sup>-2PP

E(B3PW91-D3) = - 2352.197335 au

E(DLPNO-CCSD(T)) = -2348.048225 au

G<sub>cont</sub> = 0.8296231 au

G = -2347.218602 au

|   |              |              |              |
|---|--------------|--------------|--------------|
| P | -0.061951000 | -0.077880000 | -0.019678000 |
| N | 1.449853000  | -1.087862000 | 0.000210000  |
| N | 0.258872000  | 0.132318000  | -1.733167000 |
| N | -0.885195000 | 1.516541000  | -0.169449000 |
| C | -0.065897000 | 1.335882000  | -2.304785000 |
| C | -0.732944000 | 2.165159000  | -1.394680000 |
| C | -1.041805000 | 3.461321000  | -1.798115000 |
| H | -1.539788000 | 4.151691000  | -1.122856000 |
| C | -0.673786000 | 3.854292000  | -3.098779000 |
| C | 0.005911000  | 3.000309000  | -3.976886000 |
| H | 0.273250000  | 3.350528000  | -4.971734000 |
| C | 0.340663000  | 1.695622000  | -3.579615000 |
| C | 1.292681000  | -0.595353000 | -2.261382000 |
| C | 1.753605000  | -0.406611000 | -3.556356000 |
| C | 2.853724000  | -1.192476000 | -3.933958000 |
| H | 3.254365000  | -1.113470000 | -4.942533000 |
| C | 3.440140000  | -2.077391000 | -3.020949000 |
| C | 3.011467000  | -2.161997000 | -1.685259000 |
| H | 3.539517000  | -2.781071000 | -0.965182000 |
| C | 1.943759000  | -1.365117000 | -1.285846000 |
| C | 1.059192000  | 0.643180000  | -4.419906000 |
| H | -0.923573000 | 4.860108000  | -3.428152000 |
| H | 4.278604000  | -2.690937000 | -3.341646000 |

|   |              |              |              |
|---|--------------|--------------|--------------|
| H | 1.789598000  | 1.121552000  | -5.083932000 |
| H | 0.327413000  | 0.150072000  | -5.080038000 |
| C | -1.489046000 | 2.149968000  | 0.953168000  |
| C | -2.894239000 | 2.104710000  | 1.091461000  |
| C | -3.475034000 | 2.751677000  | 2.186628000  |
| H | -4.555916000 | 2.749355000  | 2.300310000  |
| C | -2.692649000 | 3.396937000  | 3.140234000  |
| H | -3.162964000 | 3.886474000  | 3.990034000  |
| C | -1.309154000 | 3.415469000  | 3.002191000  |
| H | -0.703614000 | 3.924011000  | 3.748612000  |
| C | -0.684203000 | 2.808664000  | 1.907370000  |
| C | -3.778088000 | 1.408975000  | 0.072377000  |
| H | -3.130033000 | 0.789380000  | -0.558789000 |
| C | -4.807188000 | 0.492330000  | 0.742314000  |
| H | -5.522158000 | 1.059455000  | 1.349070000  |
| H | -5.390282000 | -0.042027000 | -0.016801000 |
| H | -4.315590000 | -0.243115000 | 1.386010000  |
| C | -4.472495000 | 2.427514000  | -0.842644000 |
| H | -3.743220000 | 3.053455000  | -1.365391000 |
| H | -5.080867000 | 1.912512000  | -1.595880000 |
| H | -5.133680000 | 3.082465000  | -0.261513000 |
| C | 0.820249000  | 2.909870000  | 1.761317000  |
| H | 1.101534000  | 2.355626000  | 0.859277000  |
| C | 1.241385000  | 4.371025000  | 1.549260000  |
| H | 2.324525000  | 4.444799000  | 1.399169000  |
| H | 0.743479000  | 4.797454000  | 0.671423000  |
| H | 0.984054000  | 4.986533000  | 2.419488000  |
| C | 1.561479000  | 2.280995000  | 2.946996000  |
| H | 1.291716000  | 1.227194000  | 3.075680000  |
| H | 2.643586000  | 2.322492000  | 2.785545000  |
| H | 1.339194000  | 2.809166000  | 3.882028000  |
| C | 2.347692000  | -0.995283000 | 1.111182000  |
| C | 2.023569000  | -1.690524000 | 2.297397000  |
| C | 2.848529000  | -1.542937000 | 3.418280000  |
| H | 2.598799000  | -2.068362000 | 4.336979000  |
| C | 3.984525000  | -0.745592000 | 3.373546000  |
| H | 4.618327000  | -0.641744000 | 4.251234000  |
| C | 4.303942000  | -0.077231000 | 2.195996000  |
| H | 5.191535000  | 0.550310000  | 2.169471000  |
| C | 3.501351000  | -0.166215000 | 1.054612000  |
| C | 0.819849000  | -2.608727000 | 2.396622000  |
| H | 0.315673000  | -2.597501000 | 1.427553000  |
| C | 1.251514000  | -4.056303000 | 2.664824000  |
| H | 1.755437000  | -4.151661000 | 3.633964000  |

|   |              |              |              |
|---|--------------|--------------|--------------|
| H | 0.380122000  | -4.721168000 | 2.676645000  |
| H | 1.941463000  | -4.409893000 | 1.890267000  |
| C | -0.180188000 | -2.121621000 | 3.451592000  |
| H | 0.262795000  | -2.133936000 | 4.454829000  |
| H | -0.513014000 | -1.100126000 | 3.240492000  |
| H | -1.066938000 | -2.764046000 | 3.466478000  |
| C | 3.935622000  | 0.629039000  | -0.172066000 |
| H | 3.195061000  | 0.500018000  | -0.962854000 |
| C | 5.280954000  | 0.114308000  | -0.706562000 |
| H | 5.257565000  | -0.964400000 | -0.881300000 |
| H | 5.523910000  | 0.605095000  | -1.656106000 |
| H | 6.091407000  | 0.328418000  | 0.001111000  |
| C | 4.028097000  | 2.135201000  | 0.098857000  |
| H | 4.749926000  | 2.368687000  | 0.890045000  |
| H | 4.350357000  | 2.656227000  | -0.810382000 |
| H | 3.060990000  | 2.545252000  | 0.391341000  |
| B | -1.421974000 | -1.455915000 | -0.164832000 |
| O | -1.559278000 | -2.090895000 | -1.363177000 |
| O | -2.248599000 | -1.920301000 | 0.814129000  |
| C | -2.720521000 | -2.963906000 | -1.254722000 |
| C | -2.848025000 | -3.154037000 | 0.295275000  |
| C | -2.440654000 | -4.237683000 | -2.034772000 |
| H | -3.258193000 | -4.954749000 | -1.899955000 |
| H | -2.361902000 | -4.004086000 | -3.101106000 |
| H | -1.504967000 | -4.706266000 | -1.721626000 |
| C | -3.887810000 | -2.203403000 | -1.876220000 |
| H | -3.632681000 | -1.943939000 | -2.908173000 |
| H | -4.799706000 | -2.809024000 | -1.884424000 |
| H | -4.086175000 | -1.275410000 | -1.334014000 |
| C | -4.270359000 | -3.267601000 | 0.812955000  |
| H | -4.748986000 | -4.162590000 | 0.399873000  |
| H | -4.258930000 | -3.357980000 | 1.903851000  |
| H | -4.872327000 | -2.397084000 | 0.549548000  |
| C | -1.999410000 | -4.305723000 | 0.826033000  |
| H | -1.980628000 | -4.261298000 | 1.918162000  |
| H | -2.417216000 | -5.272372000 | 0.527677000  |
| H | -0.968654000 | -4.245117000 | 0.464435000  |
| H | 0.106820000  | 0.135097000  | 1.380434000  |

**Acr<sup>Dipp</sup>-TS<sub>1NP/2NP</sub>**

E(B3PW91-D3) = -2352.153381 au

E(DLPNO-CCSD(T)) = -2348.013341 au

G<sub>cont</sub> = 0.825602905 au

G = -2347.187738 au

|   |              |              |              |
|---|--------------|--------------|--------------|
| P | 0.645999000  | 0.639592000  | -0.036737000 |
| N | -1.694826000 | 0.518849000  | 0.023951000  |
| N | 0.384616000  | -0.011414000 | 1.517850000  |
| N | 2.218009000  | -0.063045000 | 0.024494000  |
| C | 1.429000000  | -0.737799000 | 2.042032000  |
| C | 2.502696000  | -0.816916000 | 1.149875000  |
| C | 3.639572000  | -1.554035000 | 1.487505000  |
| H | 4.481539000  | -1.621694000 | 0.805562000  |
| H | 4.514284000  | -2.760618000 | 3.028072000  |
| C | 3.643822000  | -2.181130000 | 2.732249000  |
| C | 2.559352000  | -2.077228000 | 3.624878000  |
| H | 2.614940000  | -2.574325000 | 4.590609000  |
| C | 1.423347000  | -1.339591000 | 3.298884000  |
| C | -0.869695000 | -0.102014000 | 2.159727000  |
| C | -0.974956000 | -0.591673000 | 3.457879000  |
| C | -2.257044000 | -0.619383000 | 4.024217000  |
| H | -2.379656000 | -0.990549000 | 5.039389000  |
| C | -3.366786000 | -0.179653000 | 3.304620000  |
| C | -3.238797000 | 0.246222000  | 1.977195000  |
| H | -4.104196000 | 0.540365000  | 1.391271000  |
| H | -4.349927000 | -0.198186000 | 3.767909000  |
| C | -1.981806000 | 0.263484000  | 1.389399000  |
| H | 0.535817000  | -0.345512000 | 4.968397000  |
| H | -0.011128000 | -1.998302000 | 4.762318000  |
| C | 0.245272000  | -1.087163000 | 4.208179000  |
| C | 3.202032000  | 0.193774000  | -0.988074000 |
| C | 3.198941000  | -0.573151000 | -2.166207000 |
| C | 4.184160000  | -0.290419000 | -3.120031000 |
| H | 4.210605000  | -0.863185000 | -4.043440000 |
| C | 5.128167000  | 0.708986000  | -2.906813000 |
| H | 5.884234000  | 0.910997000  | -3.661838000 |
| C | 5.104631000  | 1.454848000  | -1.730621000 |
| H | 5.841776000  | 2.239207000  | -1.578313000 |
| C | 4.141606000  | 1.215757000  | -0.746473000 |
| C | 2.185026000  | -1.672411000 | -2.424873000 |
| H | 1.491652000  | -1.715228000 | -1.579231000 |
| C | 1.355432000  | -1.370153000 | -3.679307000 |
| H | 1.980899000  | -1.352128000 | -4.580125000 |
| H | 0.587862000  | -2.138844000 | -3.820649000 |
| H | 0.848418000  | -0.403695000 | -3.592766000 |
| C | 2.871079000  | -3.040805000 | -2.523847000 |
| H | 3.429838000  | -3.268293000 | -1.608776000 |
| H | 2.123353000  | -3.827765000 | -2.671985000 |

|   |              |              |              |
|---|--------------|--------------|--------------|
| H | 3.570979000  | -3.079040000 | -3.367264000 |
| C | 4.120301000  | 2.055999000  | 0.518578000  |
| H | 3.322146000  | 1.684290000  | 1.168860000  |
| C | 5.433307000  | 1.930191000  | 1.301158000  |
| H | 5.371128000  | 2.494902000  | 2.238474000  |
| H | 5.645640000  | 0.883776000  | 1.546507000  |
| H | 6.281833000  | 2.324409000  | 0.729671000  |
| C | 3.795131000  | 3.520375000  | 0.195097000  |
| H | 2.844760000  | 3.602192000  | -0.343492000 |
| H | 3.716314000  | 4.106420000  | 1.118044000  |
| H | 4.576186000  | 3.973589000  | -0.426825000 |
| C | -2.247615000 | 1.736134000  | -0.513509000 |
| C | -2.830520000 | 1.842998000  | -1.807684000 |
| C | -3.542702000 | 3.009379000  | -2.126048000 |
| H | -4.021158000 | 3.069627000  | -3.100249000 |
| C | -3.649274000 | 4.086218000  | -1.260069000 |
| H | -4.232210000 | 4.963936000  | -1.528777000 |
| C | -2.928990000 | 4.042089000  | -0.073311000 |
| H | -2.908705000 | 4.918422000  | 0.570373000  |
| C | -2.189457000 | 2.916760000  | 0.294500000  |
| C | -2.683464000 | 0.848665000  | -2.951410000 |
| H | -2.122918000 | -0.013739000 | -2.614066000 |
| C | -4.027421000 | 0.322025000  | -3.461695000 |
| H | -4.646037000 | 1.114305000  | -3.901559000 |
| H | -3.861273000 | -0.437870000 | -4.234901000 |
| H | -4.584303000 | -0.147006000 | -2.645437000 |
| C | -1.850516000 | 1.470764000  | -4.082766000 |
| H | -2.349908000 | 2.333370000  | -4.540824000 |
| H | -0.876185000 | 1.807174000  | -3.708387000 |
| H | -1.673848000 | 0.727959000  | -4.870813000 |
| C | -1.262173000 | 3.101180000  | 1.493059000  |
| H | -0.706937000 | 2.181814000  | 1.666447000  |
| C | -1.997639000 | 3.422575000  | 2.798476000  |
| H | -2.719385000 | 2.639180000  | 3.047052000  |
| H | -1.282671000 | 3.505008000  | 3.625951000  |
| H | -2.536743000 | 4.374818000  | 2.729907000  |
| C | -0.203608000 | 4.171643000  | 1.180993000  |
| H | -0.650240000 | 5.167072000  | 1.076071000  |
| H | 0.536557000  | 4.218642000  | 1.989551000  |
| H | 0.322342000  | 3.939488000  | 0.248322000  |
| B | -1.486201000 | -0.920501000 | -0.761727000 |
| O | -0.956327000 | -1.899494000 | 0.174475000  |
| O | -2.694679000 | -1.506796000 | -1.300315000 |
| C | -1.489842000 | -3.170406000 | -0.167793000 |

|   |              |              |              |
|---|--------------|--------------|--------------|
| C | -2.900002000 | -2.805805000 | -0.746634000 |
| C | -1.516121000 | -4.035093000 | 1.087150000  |
| H | -2.008367000 | -4.995659000 | 0.892875000  |
| H | -0.489774000 | -4.235625000 | 1.415624000  |
| H | -2.036835000 | -3.528916000 | 1.904226000  |
| C | -0.569286000 | -3.812021000 | -1.210996000 |
| H | 0.443541000  | -3.861943000 | -0.797874000 |
| H | -0.886084000 | -4.827064000 | -1.475609000 |
| H | -0.533674000 | -3.206430000 | -2.121272000 |
| C | -3.388379000 | -3.734171000 | -1.854812000 |
| H | -3.467161000 | -4.767750000 | -1.495713000 |
| H | -4.380522000 | -3.413501000 | -2.191840000 |
| H | -2.717946000 | -3.711310000 | -2.718046000 |
| C | -3.974605000 | -2.708743000 | 0.337844000  |
| H | -4.864639000 | -2.235183000 | -0.091281000 |
| H | -4.258044000 | -3.696661000 | 0.720218000  |
| H | -3.633082000 | -2.092771000 | 1.172019000  |
| H | -0.621668000 | -0.625741000 | -1.623167000 |

### Acr<sup>Dipp</sup>-2NP

E(B3PW91-D3) = -2352.20523 au

E(DLPNO-CCSD(T)) = -2348.065693 au

G<sub>cont</sub> = 0.824258235 au

G = -2347.241435 au

|   |              |              |              |
|---|--------------|--------------|--------------|
| P | 0.741719000  | -0.329781000 | 0.599496000  |
| N | -1.931062000 | 0.412883000  | -0.183328000 |
| N | 0.634091000  | 1.427862000  | 0.773670000  |
| N | 2.461217000  | -0.219477000 | 0.717802000  |
| C | 1.811098000  | 1.882650000  | 1.405615000  |
| C | 2.866929000  | 0.959900000  | 1.345651000  |
| C | 4.115830000  | 1.289451000  | 1.857805000  |
| H | 4.939680000  | 0.584960000  | 1.784487000  |
| C | 4.269934000  | 2.540584000  | 2.473483000  |
| C | 3.198862000  | 3.429307000  | 2.578036000  |
| H | 3.330416000  | 4.383310000  | 3.084158000  |
| C | 1.945323000  | 3.108463000  | 2.035203000  |
| C | -0.571728000 | 2.037812000  | 1.137157000  |
| C | -0.547417000 | 3.234955000  | 1.892932000  |
| C | -1.736638000 | 3.738861000  | 2.412520000  |
| H | -1.705553000 | 4.649694000  | 3.006982000  |
| C | -2.954967000 | 3.099675000  | 2.178212000  |
| C | -2.983514000 | 1.995597000  | 1.338060000  |
| H | -3.934344000 | 1.556227000  | 1.049333000  |

|   |              |              |              |
|---|--------------|--------------|--------------|
| C | -1.812487000 | 1.477388000  | 0.770062000  |
| C | 0.742239000  | 4.008986000  | 2.065193000  |
| H | 5.236566000  | 2.812011000  | 2.890339000  |
| H | -3.876308000 | 3.491814000  | 2.599874000  |
| H | 0.716114000  | 4.584890000  | 2.997791000  |
| H | 0.815959000  | 4.750666000  | 1.252416000  |
| C | 3.334256000  | -1.127236000 | 0.049558000  |
| C | 3.517818000  | -2.411923000 | 0.594813000  |
| C | 4.297255000  | -3.328307000 | -0.120848000 |
| H | 4.437572000  | -4.334213000 | 0.266601000  |
| C | 4.900479000  | -2.965212000 | -1.320406000 |
| H | 5.504904000  | -3.687143000 | -1.865084000 |
| C | 4.738187000  | -1.675246000 | -1.824780000 |
| H | 5.219530000  | -1.408451000 | -2.761274000 |
| C | 3.949807000  | -0.732824000 | -1.158801000 |
| C | 2.868245000  | -2.806952000 | 1.909370000  |
| H | 2.550029000  | -1.883096000 | 2.406882000  |
| C | 1.619386000  | -3.667242000 | 1.664921000  |
| H | 1.888400000  | -4.602693000 | 1.158766000  |
| H | 1.130364000  | -3.918244000 | 2.613673000  |
| H | 0.888819000  | -3.150427000 | 1.031971000  |
| C | 3.842074000  | -3.517439000 | 2.856281000  |
| H | 4.749976000  | -2.923612000 | 3.009481000  |
| H | 3.368043000  | -3.675787000 | 3.831788000  |
| H | 4.140780000  | -4.500786000 | 2.474372000  |
| C | 3.700919000  | 0.644033000  | -1.751674000 |
| H | 3.512974000  | 1.338342000  | -0.926570000 |
| C | 4.896041000  | 1.197038000  | -2.533007000 |
| H | 4.707670000  | 2.241914000  | -2.804013000 |
| H | 5.817531000  | 1.158953000  | -1.940842000 |
| H | 5.066678000  | 0.647705000  | -3.466741000 |
| C | 2.440771000  | 0.620906000  | -2.627000000 |
| H | 1.558067000  | 0.300633000  | -2.066457000 |
| H | 2.228795000  | 1.617825000  | -3.030077000 |
| H | 2.565252000  | -0.069579000 | -3.470218000 |
| C | -1.527421000 | 0.553953000  | -1.560015000 |
| C | -1.103287000 | -0.608721000 | -2.274422000 |
| C | -0.693573000 | -0.476138000 | -3.604193000 |
| H | -0.381076000 | -1.364622000 | -4.145647000 |
| C | -0.637251000 | 0.753095000  | -4.242005000 |
| H | -0.283830000 | 0.832619000  | -5.267100000 |
| C | -1.044096000 | 1.876591000  | -3.541667000 |
| H | -1.018776000 | 2.843657000  | -4.037059000 |
| C | -1.522601000 | 1.810346000  | -2.226845000 |



|   |              |              |              |
|---|--------------|--------------|--------------|
| C | -1.081395000 | -2.034576000 | -1.730773000 |
| H | -1.281440000 | -2.006731000 | -0.653948000 |
| C | -2.159133000 | -2.894892000 | -2.409669000 |
| H | -1.926483000 | -3.028110000 | -3.472932000 |
| H | -2.194619000 | -3.893107000 | -1.954834000 |
| H | -3.146191000 | -2.438166000 | -2.327474000 |
| C | 0.282385000  | -2.723817000 | -1.906834000 |
| H | 0.491558000  | -2.934870000 | -2.961701000 |
| H | 1.105549000  | -2.120773000 | -1.516006000 |
| H | 0.282401000  | -3.684169000 | -1.377768000 |
| C | -2.036776000 | 3.133393000  | -1.665857000 |
| H | -2.449378000 | 2.975475000  | -0.675529000 |
| C | -3.189224000 | 3.693256000  | -2.512210000 |
| H | -3.999032000 | 2.960256000  | -2.603225000 |
| H | -3.595911000 | 4.595441000  | -2.039095000 |
| H | -2.868118000 | 3.965950000  | -3.524238000 |
| C | -0.900931000 | 4.156264000  | -1.522478000 |
| H | -0.512732000 | 4.466090000  | -2.500473000 |
| H | -1.257266000 | 5.053164000  | -1.001858000 |
| H | -0.067491000 | 3.736866000  | -0.949973000 |
| B | -2.827417000 | -0.634511000 | 0.260571000  |
| O | -2.790389000 | -1.095955000 | 1.556313000  |
| O | -3.826398000 | -1.199195000 | -0.490538000 |
| C | -3.698008000 | -2.222862000 | 1.630652000  |
| C | -4.666462000 | -1.953301000 | 0.426262000  |
| C | -4.365873000 | -2.222478000 | 2.996385000  |
| H | -5.131240000 | -3.004930000 | 3.048927000  |
| H | -3.618525000 | -2.422135000 | 3.771064000  |
| H | -4.831223000 | -1.258739000 | 3.216023000  |
| C | -2.854217000 | -3.484813000 | 1.456747000  |
| H | -2.060667000 | -3.485397000 | 2.210365000  |
| H | -3.457696000 | -4.389297000 | 1.585074000  |
| H | -2.383016000 | -3.518716000 | 0.470381000  |
| C | -5.175473000 | -3.203164000 | -0.272135000 |
| H | -5.764307000 | -3.810477000 | 0.424404000  |
| H | -5.820728000 | -2.920802000 | -1.110352000 |
| H | -4.358812000 | -3.812050000 | -0.663319000 |
| C | -5.837198000 | -1.041409000 | 0.789683000  |
| H | -6.339805000 | -0.726341000 | -0.130033000 |
| H | -6.564426000 | -1.558501000 | 1.423861000  |
| H | -5.495328000 | -0.144652000 | 1.315807000  |
| H | 0.437549000  | -0.603978000 | 1.986626000  |

**Acr<sup>Dipp</sup>-2NP'**

E(B3PW91-D3) = -2352.203248 au

E(DLPNO-CCSD(T)) = -2348.059300 au

G<sub>cont</sub> = 0.822033 au

G = -2347.237266 au

|   |              |             |              |
|---|--------------|-------------|--------------|
| P | 0.732066000  | -0.16018900 | -0.067611000 |
| N | -1.740007000 | 0.40269600  | -0.343415000 |
| N | 0.369671000  | 0.73959400  | 1.420317000  |
| N | 2.418868000  | -0.13257800 | 0.414341000  |
| C | 1.531958000  | 1.21079000  | 2.050664000  |
| C | 2.710634000  | 0.72787000  | 1.461857000  |
| C | 3.946087000  | 1.09873800  | 1.982493000  |
| H | 4.863013000  | 0.72566300  | 1.534815000  |
| C | 3.968294000  | 1.96145000  | 3.091198000  |
| C | 2.788403000  | 2.42843900  | 3.670779000  |
| H | 2.828497000  | 3.08891500  | 4.534338000  |
| C | 1.538626000  | 2.04146000  | 3.157572000  |
| C | -0.816363000 | 1.41723100  | 1.669390000  |
| C | -0.927612000 | 2.27600300  | 2.782991000  |
| C | -2.119686000 | 2.97867100  | 2.968158000  |
| H | -2.201138000 | 3.64638100  | 3.823939000  |
| C | -3.203613000 | 2.83522300  | 2.100255000  |
| C | -3.088225000 | 1.98729500  | 1.001802000  |
| H | -3.904880000 | 1.85516800  | 0.297622000  |
| C | -1.891972000 | 1.31341200  | 0.768048000  |
| C | 0.211140000  | 2.40190600  | 3.774266000  |
| H | 4.926589000  | 2.26577100  | 3.505076000  |
| H | -4.126281000 | 3.38065000  | 2.277593000  |
| H | 0.238089000  | 3.41784500  | 4.187375000  |
| H | 0.018918000  | 1.73355000  | 4.630086000  |
| C | 3.393959000  | -0.89722300 | -0.284562000 |
| C | 3.657632000  | -2.21598400 | 0.139800000  |
| C | 4.578426000  | -2.97044300 | -0.594085000 |
| H | 4.790982000  | -3.99507700 | -0.299017000 |
| C | 5.223946000  | -2.43066400 | -1.704896000 |
| H | 5.935045000  | -3.03396600 | -2.264924000 |
| C | 4.961306000  | -1.12140000 | -2.099713000 |
| H | 5.469406000  | -0.71170400 | -2.969595000 |
| C | 4.043720000  | -0.33113600 | -1.398867000 |
| C | 2.931988000  | -2.81620900 | 1.329795000  |
| H | 2.452528000  | -1.99384700 | 1.871440000  |
| C | 1.822797000  | -3.76796800 | 0.856578000  |
| H | 2.247265000  | -4.61427100 | 0.301697000  |
| H | 1.267712000  | -4.16722000 | 1.714380000  |

|   |              |             |              |
|---|--------------|-------------|--------------|
| H | 1.113536000  | -3.25057100 | 0.201443000  |
| C | 3.882854000  | -3.51660500 | 2.306336000  |
| H | 4.687147000  | -2.84486700 | 2.626289000  |
| H | 3.333491000  | -3.84073000 | 3.197818000  |
| H | 4.341880000  | -4.40822500 | 1.862544000  |
| C | 3.741901000  | 1.08606100  | -1.852375000 |
| H | 3.102815000  | 1.55098900  | -1.094141000 |
| C | 5.011234000  | 1.93939400  | -1.957168000 |
| H | 4.750620000  | 2.97514400  | -2.203771000 |
| H | 5.562136000  | 1.94231400  | -1.010069000 |
| H | 5.684761000  | 1.57167600  | -2.740491000 |
| C | 2.965573000  | 1.07964100  | -3.176688000 |
| H | 2.030352000  | 0.51527800  | -3.088247000 |
| H | 2.715123000  | 2.10263600  | -3.481355000 |
| H | 3.559444000  | 0.62291300  | -3.977961000 |
| C | -1.816909000 | 0.82869900  | -1.706030000 |
| C | -1.936712000 | -0.18394400 | -2.697506000 |
| C | -2.140864000 | 0.18912300  | -4.027704000 |
| H | -2.255863000 | -0.58651900 | -4.780549000 |
| C | -2.171793000 | 1.52259000  | -4.415270000 |
| H | -2.352600000 | 1.79753100  | -5.451350000 |
| C | -1.892859000 | 2.49159300  | -3.461837000 |
| H | -1.817458000 | 3.53010700  | -3.774224000 |
| C | -1.663342000 | 2.18192900  | -2.114947000 |
| C | -1.734913000 | -1.67067100 | -2.424480000 |
| H | -1.589507000 | -1.83707400 | -1.349615000 |
| C | -2.923544000 | -2.52501700 | -2.877117000 |
| H | -3.054572000 | -2.47415100 | -3.963845000 |
| H | -2.758886000 | -3.57879000 | -2.621893000 |
| H | -3.848255000 | -2.18852300 | -2.402417000 |
| C | -0.433146000 | -2.16051100 | -3.078910000 |
| H | -0.488788000 | -2.08874900 | -4.171449000 |
| H | 0.424884000  | -1.56996500 | -2.742808000 |
| H | -0.248754000 | -3.20917800 | -2.815812000 |
| C | -1.146080000 | 3.33279000  | -1.252051000 |
| H | -0.941482000 | 2.97363400  | -0.246583000 |
| C | -2.158683000 | 4.47717400  | -1.127295000 |
| H | -3.112386000 | 4.11957000  | -0.727277000 |
| H | -1.775790000 | 5.25084400  | -0.451525000 |
| H | -2.354315000 | 4.94807800  | -2.098166000 |
| C | 0.198476000  | 3.84583600  | -1.792776000 |
| H | 0.096738000  | 4.29914500  | -2.785613000 |
| H | 0.607604000  | 4.60604400  | -1.116359000 |
| H | 0.927102000  | 3.03124800  | -1.869191000 |

|   |              |             |              |
|---|--------------|-------------|--------------|
| B | -2.497953000 | -0.76697300 | 0.141991000  |
| O | -2.005057000 | -1.53116400 | 1.165005000  |
| O | -3.789172000 | -1.06374300 | -0.203702000 |
| C | -2.995797000 | -2.55034500 | 1.454893000  |
| C | -4.305656000 | -1.92683800 | 0.851607000  |
| C | -3.030771000 | -2.77136700 | 2.958600000  |
| H | -3.834666000 | -3.46633200 | 3.225621000  |
| H | -2.080440000 | -3.20421400 | 3.287075000  |
| H | -3.180428000 | -1.83367300 | 3.498813000  |
| C | -2.540762000 | -3.82207600 | 0.743984000  |
| H | -1.526466000 | -4.06681100 | 1.073511000  |
| H | -3.197777000 | -4.66595100 | 0.978079000  |
| H | -2.520320000 | -3.68760700 | -0.340482000 |
| C | -5.266134000 | -2.93220400 | 0.240965000  |
| H | -5.621739000 | -3.62994000 | 1.007316000  |
| H | -6.133261000 | -2.40836200 | -0.174005000 |
| H | -4.797642000 | -3.50420800 | -0.562571000 |
| C | -5.037047000 | -1.01035800 | 1.829812000  |
| H | -5.820823000 | -0.46993000 | 1.289674000  |
| H | -5.503586000 | -1.58081200 | 2.639299000  |
| H | -4.356533000 | -0.27070200 | 2.263928000  |
| H | 0.753001000  | 0.96569000  | -0.964783000 |

**Acr<sup>Dipp</sup>-TS<sub>2NP/3NP</sub>**

E(B3PW91-D3) = -2677.766759 au

E(DLPNO-CCSD(T)) = -2673.010877 au

G<sub>cont</sub> = 0.942077 au

G = -2672.0688 au

|   |              |              |              |
|---|--------------|--------------|--------------|
| P | -0.755882000 | 0.032562000  | -0.276175000 |
| N | -0.177533000 | -1.275760000 | -1.301758000 |
| N | -2.319431000 | -0.619497000 | -0.300154000 |
| N | 2.173984000  | -0.197309000 | 0.034323000  |
| C | -2.492190000 | -1.542510000 | -1.347347000 |
| C | -1.268541000 | -1.892616000 | -1.927281000 |
| C | -1.187128000 | -2.744764000 | -3.017526000 |
| C | -2.382788000 | -3.303714000 | -3.485142000 |
| C | -3.603696000 | -3.008317000 | -2.872730000 |
| C | -3.673644000 | -2.114367000 | -1.797773000 |
| H | -2.354548000 | -3.977490000 | -4.338955000 |
| H | -4.616613000 | -1.877197000 | -1.315345000 |
| C | 2.212307000  | -0.763482000 | -1.286441000 |
| C | 3.425462000  | -0.740049000 | -1.983108000 |
| C | 3.564987000  | -1.366415000 | -3.213973000 |

|   |              |              |              |
|---|--------------|--------------|--------------|
| C | 2.485883000  | -2.082344000 | -3.728772000 |
| C | 1.253188000  | -2.108246000 | -3.077987000 |
| C | 1.087953000  | -1.361977000 | -1.888996000 |
| H | 4.288017000  | -0.293432000 | -1.498351000 |
| H | 2.599252000  | -2.645309000 | -4.653073000 |
| C | 0.162886000  | -3.011275000 | -3.621612000 |
| H | 4.517771000  | -1.348291000 | -3.735380000 |
| H | -4.516148000 | -3.467230000 | -3.243813000 |
| H | 0.455084000  | -4.055635000 | -3.430552000 |
| H | 0.110006000  | -2.912332000 | -4.713585000 |
| C | -3.101788000 | -0.787274000 | 0.903497000  |
| C | -2.841934000 | -1.906809000 | 1.727216000  |
| C | -4.143847000 | 0.113720000  | 1.183222000  |
| C | -3.678297000 | -2.114897000 | 2.828146000  |
| C | -4.952028000 | -0.140917000 | 2.297928000  |
| C | -4.729128000 | -1.246534000 | 3.110596000  |
| H | -3.507226000 | -2.973110000 | 3.472709000  |
| H | -5.770814000 | 0.536476000  | 2.526100000  |
| H | -5.371370000 | -1.431206000 | 3.968801000  |
| C | 2.221297000  | -1.009497000 | 1.229963000  |
| C | 2.603615000  | -2.383184000 | 1.255521000  |
| C | 1.880715000  | -0.368410000 | 2.459530000  |
| C | 2.696805000  | -3.025383000 | 2.497955000  |
| C | 2.035921000  | -1.062020000 | 3.662588000  |
| C | 2.453102000  | -2.382558000 | 3.699921000  |
| H | 2.974949000  | -4.075040000 | 2.516314000  |
| H | 1.797381000  | -0.555567000 | 4.593905000  |
| H | 2.556201000  | -2.909819000 | 4.644912000  |
| C | -4.413945000 | 1.322620000  | 0.317045000  |
| H | -3.583277000 | 1.419749000  | -0.383968000 |
| C | -1.720840000 | -2.894978000 | 1.453446000  |
| H | -1.061671000 | -2.472432000 | 0.689964000  |
| C | 1.315701000  | 1.042639000  | 2.596742000  |
| H | 1.171084000  | 1.474411000  | 1.599384000  |
| C | 2.882074000  | -3.294662000 | 0.057917000  |
| H | 3.006665000  | -2.702769000 | -0.839183000 |
| C | -4.463128000 | 2.610324000  | 1.143194000  |
| H | -4.553356000 | 3.473703000  | 0.477500000  |
| H | -5.317026000 | 2.619784000  | 1.832076000  |
| H | -3.545126000 | 2.733972000  | 1.726759000  |
| C | -5.695517000 | 1.153030000  | -0.507512000 |
| H | -5.648852000 | 0.263053000  | -1.144898000 |
| H | -6.576181000 | 1.060165000  | 0.140516000  |
| H | -5.837774000 | 2.026629000  | -1.154521000 |

|   |              |              |              |
|---|--------------|--------------|--------------|
| C | -2.269096000 | -4.219696000 | 0.904994000  |
| H | -1.442747000 | -4.901016000 | 0.670097000  |
| H | -2.912936000 | -4.709498000 | 1.646080000  |
| H | -2.853363000 | -4.063138000 | -0.007192000 |
| C | -0.846070000 | -3.133987000 | 2.686763000  |
| H | 0.006428000  | -3.765808000 | 2.419983000  |
| H | -0.443664000 | -2.195263000 | 3.078260000  |
| H | -1.396629000 | -3.636571000 | 3.490669000  |
| C | 4.188135000  | -4.089647000 | 0.194162000  |
| H | 4.398822000  | -4.608955000 | -0.748223000 |
| H | 5.031312000  | -3.424735000 | 0.412772000  |
| H | 4.145734000  | -4.851113000 | 0.981063000  |
| C | 1.685839000  | -4.226820000 | -0.183565000 |
| H | 1.530047000  | -4.900548000 | 0.668029000  |
| H | 0.762857000  | -3.656120000 | -0.329547000 |
| H | 1.851798000  | -4.840638000 | -1.077341000 |
| C | 2.251819000  | 1.973242000  | 3.382221000  |
| H | 3.253796000  | 1.979791000  | 2.953429000  |
| H | 1.856732000  | 2.996690000  | 3.383476000  |
| H | 2.329304000  | 1.652598000  | 4.427537000  |
| C | -0.059608000 | 1.028848000  | 3.293355000  |
| H | -0.723919000 | 0.249917000  | 2.906308000  |
| H | 0.051051000  | 0.848027000  | 4.368855000  |
| H | -0.557422000 | 1.996910000  | 3.166497000  |
| B | 2.826410000  | 1.107567000  | 0.019176000  |
| O | 3.890310000  | 1.473280000  | 0.800133000  |
| O | 2.483804000  | 2.055789000  | -0.914067000 |
| C | 3.275129000  | 3.244646000  | -0.643545000 |
| C | 4.467795000  | 2.670174000  | 0.203043000  |
| C | 4.966221000  | 3.587761000  | 1.307980000  |
| H | 5.371295000  | 4.509981000  | 0.877042000  |
| H | 5.766935000  | 3.089636000  | 1.864144000  |
| H | 4.176133000  | 3.852001000  | 2.012661000  |
| C | 5.646999000  | 2.207198000  | -0.650808000 |
| H | 6.332182000  | 1.626341000  | -0.025682000 |
| H | 6.193078000  | 3.060369000  | -1.065816000 |
| H | 5.321041000  | 1.574881000  | -1.481346000 |
| C | 3.675345000  | 3.864416000  | -1.973001000 |
| H | 4.351091000  | 4.711808000  | -1.812890000 |
| H | 2.782180000  | 4.232190000  | -2.487893000 |
| H | 4.167711000  | 3.139139000  | -2.624949000 |
| C | 2.393040000  | 4.210688000  | 0.140721000  |
| H | 1.494645000  | 4.432620000  | -0.442189000 |
| H | 2.918353000  | 5.150470000  | 0.338627000  |

|   |              |             |              |
|---|--------------|-------------|--------------|
| H | 2.081405000  | 3.778420000 | 1.096524000  |
| C | -0.771550000 | 2.460869000 | -0.279466000 |
| N | -0.428166000 | 1.385892000 | -1.150901000 |
| C | -1.773835000 | 3.407222000 | -0.684604000 |
| C | -1.927968000 | 4.622987000 | 0.029165000  |
| C | -2.619062000 | 3.213656000 | -1.805458000 |
| C | -2.877428000 | 5.568010000 | -0.338729000 |
| H | -1.286222000 | 4.810136000 | 0.889604000  |
| C | -3.580017000 | 4.156086000 | -2.157328000 |
| H | -2.506428000 | 2.306944000 | -2.395187000 |
| C | -3.724728000 | 5.344120000 | -1.431786000 |
| H | -2.964825000 | 6.488991000 | 0.235264000  |
| H | -4.219267000 | 3.966642000 | -3.018192000 |
| H | -4.471409000 | 6.081446000 | -1.715978000 |
| H | -0.837383000 | 0.673553000 | 0.999713000  |
| H | 0.051585000  | 2.861753000 | 0.308354000  |
| H | 0.439038000  | 1.409515000 | -1.686275000 |

### **Acr<sup>Dipp</sup>-3NP**

E(B3PW91-D3) = -2677.8632 au

E(DLPNO-CCSD(T)) = -2673.118424 au

G<sub>cont</sub> = 0.942439 au

G = -2672.175985 au

|   |              |              |             |
|---|--------------|--------------|-------------|
| P | 0.765158000  | 0.021669000  | 0.088372000 |
| N | -2.221884000 | -0.368506000 | 0.107683000 |
| N | 0.348882000  | -1.231750000 | 1.278233000 |
| N | 2.377603000  | -0.627972000 | 0.062978000 |
| C | 1.523212000  | -1.644792000 | 1.939080000 |
| C | 2.688833000  | -1.328403000 | 1.226999000 |
| C | 3.937441000  | -1.680575000 | 1.726027000 |
| H | 4.835193000  | -1.449905000 | 1.159113000 |
| C | 3.997576000  | -2.329019000 | 2.966871000 |
| C | 2.835716000  | -2.587965000 | 3.697170000 |
| H | 2.901737000  | -3.056834000 | 4.676845000 |
| C | 1.575571000  | -2.240093000 | 3.189736000 |
| C | -0.821394000 | -1.110829000 | 2.046642000 |
| C | -0.819291000 | -1.553718000 | 3.393038000 |
| C | -1.887340000 | -1.232260000 | 4.226402000 |
| H | -1.863824000 | -1.561291000 | 5.263267000 |
| C | -2.978020000 | -0.509794000 | 3.745170000 |
| C | -3.039455000 | -0.209674000 | 2.392300000 |
| H | -3.940029000 | 0.238959000  | 1.985247000 |
| C | -2.001953000 | -0.546194000 | 1.510769000 |

|   |              |              |              |
|---|--------------|--------------|--------------|
| C | 0.278527000  | -2.457710000 | 3.912810000  |
| H | -3.802111000 | -0.244202000 | 4.401728000  |
| H | 4.964556000  | -2.614317000 | 3.373639000  |
| H | -0.046857000 | -3.504716000 | 3.795120000  |
| H | 0.412526000  | -2.305720000 | 4.990540000  |
| C | 3.217799000  | -0.679872000 | -1.090144000 |
| C | 3.977950000  | 0.448874000  | -1.450921000 |
| C | 4.824009000  | 0.353001000  | -2.562407000 |
| H | 5.413019000  | 1.216842000  | -2.861596000 |
| C | 4.929280000  | -0.831528000 | -3.282929000 |
| H | 5.601466000  | -0.893724000 | -4.135920000 |
| C | 4.162810000  | -1.936189000 | -2.917999000 |
| H | 4.241684000  | -2.852780000 | -3.496860000 |
| C | 3.282621000  | -1.881244000 | -1.833481000 |
| C | 3.883589000  | 1.754373000  | -0.687402000 |
| H | 3.249498000  | 1.582493000  | 0.186754000  |
| C | 3.207832000  | 2.831927000  | -1.544760000 |
| H | 3.781277000  | 3.026036000  | -2.459739000 |
| H | 3.123306000  | 3.769801000  | -0.985823000 |
| H | 2.199601000  | 2.518739000  | -1.841284000 |
| C | 5.248059000  | 2.229144000  | -0.176690000 |
| H | 5.729540000  | 1.458463000  | 0.436351000  |
| H | 5.121488000  | 3.128365000  | 0.437117000  |
| H | 5.927821000  | 2.480010000  | -0.999990000 |
| C | 2.423668000  | -3.087789000 | -1.495480000 |
| H | 1.627086000  | -2.755685000 | -0.819884000 |
| C | 3.237273000  | -4.172541000 | -0.774599000 |
| H | 2.592880000  | -5.021288000 | -0.515422000 |
| H | 3.687130000  | -3.792563000 | 0.147013000  |
| H | 4.041900000  | -4.543019000 | -1.422603000 |
| C | 1.748684000  | -3.673653000 | -2.741256000 |
| H | 1.227067000  | -2.899253000 | -3.310882000 |
| H | 1.009127000  | -4.425430000 | -2.446110000 |
| H | 2.473601000  | -4.161420000 | -3.404078000 |
| C | -2.093836000 | -1.465344000 | -0.823499000 |
| C | -1.588072000 | -1.209780000 | -2.132437000 |
| C | -1.462600000 | -2.279147000 | -3.024039000 |
| H | -1.089037000 | -2.084213000 | -4.025567000 |
| C | -1.781101000 | -3.581108000 | -2.667492000 |
| H | -1.645718000 | -4.397086000 | -3.373101000 |
| C | -2.287147000 | -3.816916000 | -1.399213000 |
| H | -2.571804000 | -4.828978000 | -1.122664000 |
| C | -2.489462000 | -2.783275000 | -0.476199000 |
| C | -1.221435000 | 0.160980000  | -2.694021000 |



|   |              |              |              |
|---|--------------|--------------|--------------|
| H | -1.234453000 | 0.889399000  | -1.875442000 |
| C | -2.235451000 | 0.599609000  | -3.763790000 |
| H | -2.162361000 | -0.045706000 | -4.647478000 |
| H | -2.026767000 | 1.626901000  | -4.089474000 |
| H | -3.257498000 | 0.550632000  | -3.387976000 |
| C | 0.186086000  | 0.197977000  | -3.312828000 |
| H | 0.219176000  | -0.349546000 | -4.262146000 |
| H | 0.942590000  | -0.230286000 | -2.652355000 |
| H | 0.471475000  | 1.235369000  | -3.526248000 |
| C | -3.202576000 | -3.180666000 | 0.810669000  |
| H | -3.329486000 | -2.305360000 | 1.440422000  |
| C | -4.617139000 | -3.700691000 | 0.516343000  |
| H | -5.196743000 | -2.958775000 | -0.045044000 |
| H | -5.144382000 | -3.908802000 | 1.455545000  |
| H | -4.600775000 | -4.627254000 | -0.069550000 |
| C | -2.389100000 | -4.201444000 | 1.617448000  |
| H | -2.333438000 | -5.170011000 | 1.105816000  |
| H | -2.848578000 | -4.366406000 | 2.599155000  |
| H | -1.365953000 | -3.846566000 | 1.774795000  |
| B | -2.994722000 | 0.791139000  | -0.261907000 |
| O | -2.876487000 | 1.999026000  | 0.388219000  |
| O | -3.965469000 | 0.794495000  | -1.234229000 |
| C | -3.682205000 | 2.953443000  | -0.345944000 |
| C | -4.714771000 | 2.027962000  | -1.074755000 |
| C | -4.289277000 | 3.937242000  | 0.640724000  |
| H | -4.981119000 | 4.616113000  | 0.129632000  |
| H | -3.495685000 | 4.537369000  | 1.097775000  |
| H | -4.827130000 | 3.422715000  | 1.440605000  |
| C | -2.745795000 | 3.678375000  | -1.310577000 |
| H | -1.940063000 | 4.143009000  | -0.735851000 |
| H | -3.270135000 | 4.463061000  | -1.865272000 |
| H | -2.296528000 | 2.983263000  | -2.026448000 |
| C | -5.163745000 | 2.525426000  | -2.438899000 |
| H | -5.683602000 | 3.484779000  | -2.338129000 |
| H | -5.857979000 | 1.805107000  | -2.883702000 |
| H | -4.323645000 | 2.653374000  | -3.123759000 |
| C | -5.931170000 | 1.689904000  | -0.213715000 |
| H | -6.494029000 | 0.885112000  | -0.696544000 |
| H | -6.591720000 | 2.555098000  | -0.096731000 |
| H | -5.632404000 | 1.344200000  | 0.781170000  |
| N | 0.765552000  | 1.325168000  | 1.160888000  |
| C | 0.295315000  | 2.638220000  | 0.777076000  |
| C | 1.258567000  | 3.772325000  | 1.063800000  |
| C | 0.992245000  | 5.040219000  | 0.530237000  |

|   |              |             |              |
|---|--------------|-------------|--------------|
| C | 2.403786000  | 3.605978000 | 1.845189000  |
| C | 1.857332000  | 6.109261000 | 0.753854000  |
| H | 0.106851000  | 5.186862000 | -0.086018000 |
| C | 3.272913000  | 4.675109000 | 2.075655000  |
| H | 2.640614000  | 2.628010000 | 2.254785000  |
| C | 3.007108000  | 5.929521000 | 1.528198000  |
| H | 1.639314000  | 7.081676000 | 0.318109000  |
| H | 4.164743000  | 4.521084000 | 2.678811000  |
| H | 3.687839000  | 6.759689000 | 1.700170000  |
| H | -0.672807000 | 2.853114000 | 1.248949000  |
| H | 0.092064000  | 2.608404000 | -0.300767000 |
| H | 0.872491000  | 1.159676000 | 2.155159000  |

**Acr<sup>Dipp</sup>-TS<sub>3NP/1NP</sub>**

E(B3PW91-D3) = -2677.844646 au

E(DLPNO-CCSD(T)) = -2673.098864 au

G<sub>cont</sub> = 0.949651 au

G = -2672.149212 au

|   |              |              |              |
|---|--------------|--------------|--------------|
| P | -0.705293000 | 0.069737000  | -0.403039000 |
| N | -0.127333000 | -1.490093000 | -1.019649000 |
| N | -2.250543000 | -0.704184000 | -0.047305000 |
| N | 2.220118000  | 0.052769000  | -0.426986000 |
| C | -2.396214000 | -1.939404000 | -0.683207000 |
| C | -1.186014000 | -2.386733000 | -1.228813000 |
| C | -1.122157000 | -3.553748000 | -1.975049000 |
| C | -2.300481000 | -4.300016000 | -2.140584000 |
| C | -3.503975000 | -3.863978000 | -1.594957000 |
| C | -3.565520000 | -2.666341000 | -0.868659000 |
| H | -2.265706000 | -5.215115000 | -2.728290000 |
| H | -4.507972000 | -2.290897000 | -0.483679000 |
| C | 2.236145000  | -0.932758000 | -1.448219000 |
| C | 3.396930000  | -1.132562000 | -2.192235000 |
| C | 3.487785000  | -2.169661000 | -3.115062000 |
| C | 2.417002000  | -3.048019000 | -3.240628000 |
| C | 1.235237000  | -2.870454000 | -2.514556000 |
| C | 1.103563000  | -1.752156000 | -1.666054000 |
| H | 4.235491000  | -0.466473000 | -2.015663000 |
| H | 2.490516000  | -3.905286000 | -3.907508000 |
| C | 0.177011000  | -3.946531000 | -2.612967000 |
| H | 4.395903000  | -2.313757000 | -3.694656000 |
| H | -4.412916000 | -4.439622000 | -1.750275000 |
| H | 0.008646000  | -4.208615000 | -3.666677000 |
| H | 0.564661000  | -4.863211000 | -2.140268000 |

|   |              |              |              |
|---|--------------|--------------|--------------|
| C | 2.704123000  | 1.368904000  | -0.739456000 |
| C | 3.839568000  | 1.906254000  | -0.079168000 |
| C | 2.046857000  | 2.159329000  | -1.728347000 |
| C | 4.123782000  | 3.271209000  | -0.221693000 |
| C | 2.391993000  | 3.508655000  | -1.848762000 |
| C | 3.383000000  | 4.087406000  | -1.064039000 |
| H | 4.972637000  | 3.692670000  | 0.310443000  |
| H | 1.876674000  | 4.119918000  | -2.584728000 |
| H | 3.611587000  | 5.146985000  | -1.152957000 |
| C | -3.424173000 | 0.005713000  | 0.373638000  |
| C | -4.024160000 | 0.932561000  | -0.515066000 |
| C | -4.020508000 | -0.294874000 | 1.622534000  |
| C | -5.192677000 | 1.585899000  | -0.115355000 |
| C | -5.197129000 | 0.390070000  | 1.962032000  |
| C | -5.779492000 | 1.322368000  | 1.115431000  |
| H | -5.659191000 | 2.304192000  | -0.782464000 |
| H | -5.666715000 | 0.175076000  | 2.920230000  |
| H | -6.687717000 | 1.841219000  | 1.413363000  |
| C | 4.878728000  | 1.060070000  | 0.641710000  |
| H | 4.481242000  | 0.051695000  | 0.760567000  |
| C | 5.237008000  | 1.600640000  | 2.029109000  |
| C | 6.147233000  | 0.964074000  | -0.223468000 |
| H | 5.716413000  | 2.584722000  | 1.965368000  |
| H | 4.344713000  | 1.685893000  | 2.652742000  |
| H | 5.946939000  | 0.931312000  | 2.528109000  |
| H | 6.874057000  | 0.286502000  | 0.241576000  |
| H | 5.928326000  | 0.588233000  | -1.228716000 |
| H | 6.624234000  | 1.945311000  | -0.335930000 |
| C | 1.087957000  | 1.602041000  | -2.771166000 |
| H | 0.736340000  | 0.624877000  | -2.443529000 |
| C | 1.841577000  | 1.390161000  | -4.093994000 |
| C | -0.156179000 | 2.462161000  | -3.002606000 |
| H | 2.198707000  | 2.347243000  | -4.494090000 |
| H | 2.704982000  | 0.732118000  | -3.957216000 |
| H | 1.179785000  | 0.933313000  | -4.840108000 |
| H | -0.846143000 | 1.932166000  | -3.669338000 |
| H | -0.681309000 | 2.665909000  | -2.066265000 |
| H | 0.083151000  | 3.419569000  | -3.480060000 |
| C | -3.601853000 | -1.353172000 | 2.649027000  |
| H | -4.018844000 | -0.984941000 | 3.596552000  |
| C | -4.278944000 | -2.709690000 | 2.388476000  |
| C | -2.114371000 | -1.560141000 | 2.915359000  |
| H | -5.343113000 | -2.587508000 | 2.158159000  |
| H | -3.806344000 | -3.235219000 | 1.554679000  |

|   |              |              |              |
|---|--------------|--------------|--------------|
| H | -4.192101000 | -3.343143000 | 3.279372000  |
| H | -1.647312000 | -0.616861000 | 3.218263000  |
| H | -1.986536000 | -2.258492000 | 3.750662000  |
| H | -1.589804000 | -1.979686000 | 2.052299000  |
| C | -3.498223000 | 1.174910000  | -1.921687000 |
| H | -2.437528000 | 0.908461000  | -1.945751000 |
| C | -4.224355000 | 0.266476000  | -2.925442000 |
| C | -3.594439000 | 2.640731000  | -2.355318000 |
| H | -5.297657000 | 0.494621000  | -2.944004000 |
| H | -3.825082000 | 0.422351000  | -3.935017000 |
| H | -4.104441000 | -0.790393000 | -2.669262000 |
| H | -3.079674000 | 2.779398000  | -3.311619000 |
| H | -4.633659000 | 2.958439000  | -2.501256000 |
| H | -3.133319000 | 3.303515000  | -1.616722000 |
| B | 1.951331000  | -0.486104000 | 0.941647000  |
| O | 2.571181000  | 0.023969000  | 2.087574000  |
| O | 1.710016000  | -1.861314000 | 1.082446000  |
| C | 2.446245000  | -2.322186000 | 2.222560000  |
| C | 2.603793000  | -1.020119000 | 3.084960000  |
| C | 1.454233000  | -0.792118000 | 4.065777000  |
| H | 1.497972000  | -1.497703000 | 4.902161000  |
| H | 1.526100000  | 0.223022000  | 4.469509000  |
| H | 0.480122000  | -0.904462000 | 3.588460000  |
| C | 3.918496000  | -0.946470000 | 3.848875000  |
| H | 3.966482000  | -0.020311000 | 4.430196000  |
| H | 3.995111000  | -1.790867000 | 4.543834000  |
| H | 4.777468000  | -0.968861000 | 3.177114000  |
| C | 3.778348000  | -2.868583000 | 1.702571000  |
| H | 4.385555000  | -3.306149000 | 2.502280000  |
| H | 3.567877000  | -3.644340000 | 0.959573000  |
| H | 4.359689000  | -2.084820000 | 1.206480000  |
| C | 1.657068000  | -3.435614000 | 2.896413000  |
| H | 1.591338000  | -4.297616000 | 2.224286000  |
| H | 2.150746000  | -3.758160000 | 3.820459000  |
| H | 0.638769000  | -3.117288000 | 3.133469000  |
| C | 0.231699000  | 1.640014000  | 1.615539000  |
| N | 0.027296000  | 0.238394000  | 1.170907000  |
| C | -0.934424000 | 2.584114000  | 1.458501000  |
| C | -0.839349000 | 3.660117000  | 0.568696000  |
| C | -2.101111000 | 2.436153000  | 2.216803000  |
| C | -1.889631000 | 4.569252000  | 0.437105000  |
| H | 0.065614000  | 3.780577000  | -0.024044000 |
| C | -3.154025000 | 3.338485000  | 2.084698000  |
| H | -2.192179000 | 1.605419000  | 2.912177000  |

|   |              |              |              |
|---|--------------|--------------|--------------|
| C | -3.051064000 | 4.408284000  | 1.193565000  |
| H | -1.802711000 | 5.397330000  | -0.262585000 |
| H | -4.059384000 | 3.197599000  | 2.667704000  |
| H | -3.875893000 | 5.108452000  | 1.085129000  |
| H | 1.088850000  | 2.038094000  | 1.067376000  |
| H | 0.541812000  | 1.580469000  | 2.661146000  |
| H | -0.418309000 | -0.336173000 | 1.876428000  |

**Acr<sup>Dipp</sup>-TS<sub>2NP/1NP</sub>**

E(B3PW91-D3) = -2677.801056 au

E(DLPNO-CCSD(T)) = -2673.042952 au

G<sub>cont</sub> = 0.942656 au

G = -2672.100296 au

|   |              |              |              |
|---|--------------|--------------|--------------|
| P | 0.886340000  | -0.223515000 | -0.112393000 |
| N | 0.691329000  | -1.163858000 | 1.320022000  |
| N | -1.837383000 | -0.347773000 | 0.128234000  |
| N | 2.592167000  | -0.256209000 | 0.095275000  |
| C | -1.722840000 | -0.714641000 | 1.509416000  |
| C | -0.511234000 | -1.216478000 | 2.053791000  |
| C | -0.444051000 | -1.692232000 | 3.385932000  |
| C | -1.538910000 | -1.519347000 | 4.223754000  |
| C | -2.697586000 | -0.909630000 | 3.746730000  |
| C | -2.787102000 | -0.539206000 | 2.413523000  |
| H | -1.481907000 | -1.870667000 | 5.251782000  |
| H | -3.699300000 | -0.103851000 | 2.030483000  |
| C | 2.998793000  | -0.780116000 | 1.319242000  |
| C | 4.279947000  | -0.857846000 | 1.857367000  |
| C | 4.422944000  | -1.439980000 | 3.120823000  |
| C | 3.317070000  | -1.935331000 | 3.821860000  |
| C | 2.034181000  | -1.880195000 | 3.267889000  |
| C | 1.903501000  | -1.300266000 | 2.015280000  |
| H | 5.131570000  | -0.472343000 | 1.304766000  |
| H | 3.452190000  | -2.374729000 | 4.807517000  |
| C | 0.782303000  | -2.421607000 | 3.891060000  |
| H | -3.552312000 | -0.764753000 | 4.402637000  |
| H | 5.411987000  | -1.504365000 | 3.566835000  |
| H | 0.688514000  | -3.491729000 | 3.642999000  |
| H | 0.833833000  | -2.364162000 | 4.983890000  |
| C | 3.494179000  | -0.114770000 | -1.009977000 |
| C | 3.980559000  | -1.281965000 | -1.635150000 |
| C | 3.840938000  | 1.173411000  | -1.454918000 |
| C | 4.852997000  | -1.124502000 | -2.715995000 |
| C | 4.699915000  | 1.277206000  | -2.554467000 |

|   |              |              |              |
|---|--------------|--------------|--------------|
| C | 5.208933000  | 0.140878000  | -3.175608000 |
| H | 5.244908000  | -2.005727000 | -3.217914000 |
| H | 4.972294000  | 2.259723000  | -2.930323000 |
| H | 5.879385000  | 0.240751000  | -4.026035000 |
| C | 3.561087000  | -2.677148000 | -1.204792000 |
| H | 2.852775000  | -2.589398000 | -0.375669000 |
| H | 1.962562000  | -2.826546000 | -2.678407000 |
| C | 2.828138000  | -3.403719000 | -2.339997000 |
| H | 2.466862000  | -4.378872000 | -1.993271000 |
| H | 3.486863000  | -3.574260000 | -3.199880000 |
| C | 4.757440000  | -3.491352000 | -0.696760000 |
| H | 5.496403000  | -3.651717000 | -1.491088000 |
| H | 4.424622000  | -4.474608000 | -0.344711000 |
| H | 5.254932000  | -2.981796000 | 0.135359000  |
| C | 3.256774000  | 2.416051000  | -0.814021000 |
| H | 2.861641000  | 2.132757000  | 0.166940000  |
| C | 4.293856000  | 3.517750000  | -0.577350000 |
| H | 3.840198000  | 4.325741000  | 0.006502000  |
| H | 4.656292000  | 3.950614000  | -1.517265000 |
| H | 5.158789000  | 3.137138000  | -0.022408000 |
| C | 2.086257000  | 2.940687000  | -1.658023000 |
| H | 1.686307000  | 3.862515000  | -1.225131000 |
| H | 1.271330000  | 2.209419000  | -1.715075000 |
| H | 2.411953000  | 3.149954000  | -2.684161000 |
| C | -1.765092000 | -1.434380000 | -0.821876000 |
| C | -2.320799000 | -2.706837000 | -0.485415000 |
| C | -1.079593000 | -1.327843000 | -2.083171000 |
| C | -1.944812000 | -3.846331000 | -1.204863000 |
| C | -0.791137000 | -2.503995000 | -2.788768000 |
| C | -1.146596000 | -3.765369000 | -2.335365000 |
| H | -2.334186000 | -4.813672000 | -0.895901000 |
| H | -0.262656000 | -2.421959000 | -3.734032000 |
| H | -0.858505000 | -4.657705000 | -2.886125000 |
| C | -3.446965000 | -2.914925000 | 0.523360000  |
| H | -3.756417000 | -1.940742000 | 0.898529000  |
| C | -3.042416000 | -3.785230000 | 1.717994000  |
| H | -3.867597000 | -3.860051000 | 2.436217000  |
| H | -2.175683000 | -3.374450000 | 2.240530000  |
| H | -2.790978000 | -4.801817000 | 1.390387000  |
| C | -4.681957000 | -3.518644000 | -0.169306000 |
| H | -4.516287000 | -4.561559000 | -0.463256000 |
| H | -4.952215000 | -2.957294000 | -1.069143000 |
| H | -5.538058000 | -3.501320000 | 0.516632000  |
| C | -0.734301000 | -0.041283000 | -2.836614000 |

|   |              |              |              |
|---|--------------|--------------|--------------|
| H | -0.820462000 | 0.803730000  | -2.152353000 |
| C | -1.750405000 | 0.165550000  | -3.973154000 |
| H | -1.617928000 | -0.599288000 | -4.748863000 |
| H | -1.607300000 | 1.149076000  | -4.438096000 |
| H | -2.771191000 | 0.112726000  | -3.598658000 |
| C | 0.673112000  | -0.014517000 | -3.455474000 |
| H | 0.876611000  | 0.983416000  | -3.860690000 |
| H | 0.769494000  | -0.721088000 | -4.287514000 |
| H | 1.462978000  | -0.248526000 | -2.736276000 |
| B | -2.508246000 | 1.081105000  | -0.194868000 |
| O | -3.651769000 | 1.370625000  | 0.669453000  |
| O | -2.994783000 | 1.211589000  | -1.543961000 |
| C | -4.671112000 | 1.964614000  | -0.126516000 |
| C | -4.419045000 | 1.296059000  | -1.513072000 |
| C | -6.025408000 | 1.650010000  | 0.498455000  |
| H | -6.843413000 | 1.978966000  | -0.153906000 |
| H | -6.123108000 | 2.171959000  | 1.457200000  |
| H | -6.135259000 | 0.578287000  | 0.685224000  |
| C | -4.465381000 | 3.483760000  | -0.164169000 |
| H | -4.412187000 | 3.857286000  | 0.864129000  |
| H | -5.289857000 | 3.993027000  | -0.676738000 |
| H | -3.528505000 | 3.741926000  | -0.666878000 |
| C | -4.895804000 | 2.107921000  | -2.709825000 |
| H | -5.971781000 | 2.307356000  | -2.637032000 |
| H | -4.715385000 | 1.554633000  | -3.637806000 |
| H | -4.365573000 | 3.061861000  | -2.777904000 |
| C | -4.993739000 | -0.120299000 | -1.574193000 |
| H | -4.584831000 | -0.640357000 | -2.446039000 |
| H | -6.087115000 | -0.118956000 | -1.650430000 |
| H | -4.702200000 | -0.682113000 | -0.684265000 |
| C | -0.480120000 | 2.155157000  | 0.988732000  |
| C | 0.383970000  | 3.320489000  | 1.305149000  |
| C | 1.468586000  | 3.148120000  | 2.178697000  |
| C | 0.120629000  | 4.595389000  | 0.790979000  |
| C | 2.284024000  | 4.223099000  | 2.515276000  |
| H | 1.679971000  | 2.156915000  | 2.577355000  |
| C | 0.940144000  | 5.673683000  | 1.127565000  |
| H | -0.738200000 | 4.751942000  | 0.143451000  |
| C | 2.024763000  | 5.491157000  | 1.985513000  |
| H | 3.127617000  | 4.072153000  | 3.183956000  |
| H | 0.724854000  | 6.659269000  | 0.722404000  |
| H | 2.664343000  | 6.331299000  | 2.243921000  |
| N | -1.389077000 | 2.165922000  | 0.006993000  |
| H | -0.785695000 | 1.589310000  | 1.870594000  |

|   |              |             |              |
|---|--------------|-------------|--------------|
| H | 0.514459000  | 1.181350000 | 0.606926000  |
| H | -1.192964000 | 2.762192000 | -0.788587000 |

**5**

E(B3PW91-D3) = -556.576548 au

E(DLPNO-CCSD(T)) = -555.530804 au

G<sub>cont</sub> = 0.172649 au

G = -555.358154 au

|   |              |              |              |
|---|--------------|--------------|--------------|
| C | -0.395668000 | 0.380174000  | -0.178969000 |
| H | -0.079913000 | 1.370376000  | -0.540887000 |
| N | 0.459048000  | -0.525075000 | 0.121825000  |
| C | 1.829085000  | -0.229027000 | 0.070774000  |
| C | 2.698352000  | -1.216607000 | -0.419423000 |
| C | 2.366925000  | 0.982669000  | 0.538621000  |
| C | 4.068453000  | -0.977666000 | -0.488160000 |
| H | 2.278348000  | -2.161132000 | -0.755414000 |
| C | 3.741857000  | 1.207841000  | 0.483590000  |
| H | 1.709294000  | 1.730357000  | 0.975532000  |
| C | 4.597577000  | 0.235227000  | -0.037382000 |
| H | 4.728133000  | -1.745334000 | -0.885549000 |
| H | 4.146526000  | 2.144974000  | 0.858840000  |
| H | 5.669016000  | 0.413947000  | -0.077671000 |
| C | -1.842817000 | 0.168425000  | -0.086819000 |
| C | -2.708751000 | 1.205442000  | -0.465313000 |
| C | -2.385248000 | -1.044124000 | 0.371917000  |
| C | -4.090890000 | 1.038071000  | -0.388889000 |
| H | -2.295083000 | 2.147309000  | -0.821165000 |
| C | -3.763639000 | -1.209806000 | 0.446721000  |
| H | -1.710634000 | -1.843706000 | 0.664511000  |
| C | -4.620568000 | -0.169884000 | 0.067172000  |
| H | -4.752607000 | 1.848218000  | -0.684514000 |
| H | -4.176566000 | -2.150555000 | 0.802366000  |
| H | -5.697852000 | -0.303346000 | 0.128134000  |

**6**

E(B3PW91-D3) = -968.3978443 au

E(DLPNO-CCSD(T)) = -966.6445412 au

G<sub>cont</sub> = 0.354333 au

G = -966.2902083 au

|   |              |              |              |
|---|--------------|--------------|--------------|
| C | -1.253799000 | -0.356833000 | -1.463906000 |
| N | -0.417409000 | 0.624904000  | -0.781431000 |
| C | -1.006272000 | 1.834542000  | -0.353637000 |



|   |              |              |              |
|---|--------------|--------------|--------------|
| C | -0.227097000 | 2.996000000  | -0.212954000 |
| C | -2.383461000 | 1.918968000  | -0.089499000 |
| C | -0.807032000 | 4.193180000  | 0.197336000  |
| H | 0.835326000  | 2.954787000  | -0.427253000 |
| C | -2.957883000 | 3.127067000  | 0.307153000  |
| H | -3.011529000 | 1.037146000  | -0.170300000 |
| C | -2.177200000 | 4.272265000  | 0.458802000  |
| H | -0.181003000 | 5.076932000  | 0.298542000  |
| H | -4.026291000 | 3.163400000  | 0.507663000  |
| H | -2.627110000 | 5.210913000  | 0.771759000  |
| C | -1.939669000 | -1.370228000 | -0.563891000 |
| C | -2.755364000 | -2.350233000 | -1.143413000 |
| C | -1.773107000 | -1.368887000 | 0.822493000  |
| C | -3.387664000 | -3.310091000 | -0.354714000 |
| H | -2.893277000 | -2.362448000 | -2.223854000 |
| C | -2.404943000 | -2.328500000 | 1.616764000  |
| H | -1.153639000 | -0.605373000 | 1.286452000  |
| C | -3.213080000 | -3.303412000 | 1.032052000  |
| H | -4.016311000 | -4.064748000 | -0.821822000 |
| H | -2.265230000 | -2.310426000 | 2.695194000  |
| H | -3.705073000 | -4.051043000 | 1.649465000  |
| B | 0.905041000  | 0.215979000  | -0.435543000 |
| O | 1.743049000  | 0.875314000  | 0.436601000  |
| O | 1.449607000  | -0.949086000 | -0.937962000 |
| C | 3.031366000  | 0.212748000  | 0.345712000  |
| C | 2.629643000  | -1.220903000 | -0.140232000 |
| C | 3.701106000  | 0.259474000  | 1.708492000  |
| H | 4.628087000  | -0.324772000 | 1.697776000  |
| H | 3.951535000  | 1.294405000  | 1.963209000  |
| H | 3.046639000  | -0.133520000 | 2.490161000  |
| C | 3.856806000  | 0.982176000  | -0.684368000 |
| H | 3.919922000  | 2.030576000  | -0.376107000 |
| H | 4.873203000  | 0.582590000  | -0.762331000 |
| H | 3.388743000  | 0.944722000  | -1.673906000 |
| C | 3.664301000  | -1.912456000 | -1.011483000 |
| H | 4.605023000  | -2.033902000 | -0.462690000 |
| H | 3.303853000  | -2.906305000 | -1.296159000 |
| H | 3.861055000  | -1.347658000 | -1.925984000 |
| C | 2.191318000  | -2.136711000 | 1.001739000  |
| H | 1.722431000  | -3.030320000 | 0.578454000  |
| H | 3.042894000  | -2.447188000 | 1.615892000  |
| H | 1.455405000  | -1.643049000 | 1.644947000  |
| H | -2.004279000 | 0.173791000  | -2.061846000 |
| H | -0.622780000 | -0.901536000 | -2.173320000 |

**TS<sup>1</sup>**<sub>2NP/1NP</sub>

E(B3PW91-D3) = -2015.661172 au

E(DLPNO-CCSD(T)) = -2012.193352 au

G<sub>cont</sub> = 0.592444 au

G = -2011.600908 au

|   |              |              |              |
|---|--------------|--------------|--------------|
| P | -1.038823000 | 0.812615000  | -2.180756000 |
| N | 1.363313000  | 0.864954000  | -1.463782000 |
| N | -2.767370000 | 0.658710000  | -2.030812000 |
| N | -1.065436000 | 1.761144000  | -0.736144000 |
| C | 1.299434000  | 2.134215000  | -0.823505000 |
| C | 0.029297000  | 2.595866000  | -0.435943000 |
| C | -0.115868000 | 3.846697000  | 0.173105000  |
| C | 1.011700000  | 4.621902000  | 0.436169000  |
| C | 2.280499000  | 4.163245000  | 0.076087000  |
| C | 2.416751000  | 2.928515000  | -0.556601000 |
| H | -1.104619000 | 4.220993000  | 0.417870000  |
| H | 0.893200000  | 5.591789000  | 0.912717000  |
| H | 3.160976000  | 4.764626000  | 0.287804000  |
| H | 3.398475000  | 2.551219000  | -0.823441000 |
| C | -3.277906000 | 1.098019000  | -0.823984000 |
| C | -2.285256000 | 1.740404000  | -0.052943000 |
| C | -2.560354000 | 2.153153000  | 1.249092000  |
| C | -3.850420000 | 1.963810000  | 1.755486000  |
| C | -4.844349000 | 1.365501000  | 0.975919000  |
| C | -4.564732000 | 0.917306000  | -0.317946000 |
| H | -1.780821000 | 2.578313000  | 1.870941000  |
| H | -4.072093000 | 2.278917000  | 2.771498000  |
| H | -5.842660000 | 1.228114000  | 1.383606000  |
| H | -5.321905000 | 0.406892000  | -0.905200000 |
| C | -3.525899000 | -0.223503000 | -2.894615000 |
| H | -4.445452000 | 0.267204000  | -3.234551000 |
| H | -3.786990000 | -1.156245000 | -2.376242000 |
| H | -2.924440000 | -0.468192000 | -3.775216000 |
| C | 2.039429000  | 0.933073000  | -2.766039000 |
| H | 1.575174000  | 1.709372000  | -3.384978000 |
| H | 1.937774000  | -0.031889000 | -3.267513000 |
| H | 3.109596000  | 1.155864000  | -2.685471000 |
| B | 1.893991000  | -0.291541000 | -0.506297000 |
| O | 2.851701000  | 0.154905000  | 0.466796000  |
| O | 2.519892000  | -1.361801000 | -1.261372000 |
| C | 3.800718000  | -0.898118000 | 0.649614000  |
| C | 3.853437000  | -1.547727000 | -0.776270000 |

|   |              |              |              |
|---|--------------|--------------|--------------|
| C | 5.113466000  | -0.285096000 | 1.122134000  |
| H | 5.909065000  | -1.039249000 | 1.150443000  |
| H | 4.988119000  | 0.116697000  | 2.133793000  |
| H | 5.428799000  | 0.534559000  | 0.471377000  |
| C | 3.293876000  | -1.875225000 | 1.716328000  |
| H | 2.401753000  | -2.410274000 | 1.382418000  |
| H | 3.027505000  | -1.312124000 | 2.616259000  |
| H | 4.062445000  | -2.611796000 | 1.977234000  |
| C | 4.173877000  | -3.038414000 | -0.785016000 |
| H | 5.146820000  | -3.231966000 | -0.317536000 |
| H | 4.214647000  | -3.401442000 | -1.818421000 |
| H | 3.409810000  | -3.613249000 | -0.255432000 |
| C | 4.827563000  | -0.819916000 | -1.706706000 |
| H | 4.640134000  | -1.135853000 | -2.738335000 |
| H | 5.869800000  | -1.049287000 | -1.456755000 |
| H | 4.691165000  | 0.263366000  | -1.650493000 |
| C | -0.200217000 | -1.589018000 | -0.664082000 |
| N | 0.570446000  | -0.906657000 | 0.206424000  |
| C | 0.245635000  | -0.706620000 | 1.564454000  |
| C | -0.175812000 | -1.785575000 | 2.359808000  |
| C | -0.454766000 | -1.605586000 | 3.710682000  |
| C | -0.293696000 | -0.350957000 | 4.304663000  |
| C | 0.164115000  | 0.713943000  | 3.528072000  |
| C | 0.437005000  | 0.540081000  | 2.172926000  |
| H | -0.269797000 | -2.771229000 | 1.914382000  |
| H | -0.782673000 | -2.454906000 | 4.305624000  |
| H | -0.506360000 | -0.211466000 | 5.361635000  |
| H | 0.313154000  | 1.693651000  | 3.976416000  |
| H | 0.811641000  | 1.369519000  | 1.587556000  |
| C | -1.490854000 | -2.275052000 | -0.406720000 |
| C | -1.736206000 | -3.472692000 | -1.093920000 |
| C | -2.966709000 | -4.119571000 | -0.981981000 |
| C | -3.974327000 | -3.565486000 | -0.191383000 |
| C | -3.740508000 | -2.366202000 | 0.488436000  |
| C | -2.510938000 | -1.726648000 | 0.383490000  |
| H | -0.956879000 | -3.898734000 | -1.722677000 |
| H | -3.138890000 | -5.049942000 | -1.517305000 |
| H | -4.938827000 | -4.060543000 | -0.109001000 |
| H | -4.523618000 | -1.914803000 | 1.091229000  |
| H | -2.351263000 | -0.787610000 | 0.902122000  |
| H | 0.388394000  | -2.039317000 | -1.465839000 |
| H | -0.706084000 | -0.590314000 | -1.573748000 |

TS<sup>1</sup><sub>2NP/3NP</sub>

E(B3PW91-D3) = -2015.630919 au

E(DLPNO-CCSD(T)) = -2012.165021 au

G<sub>cont</sub> = 0.588355 au

G = -2011.576667 au

|   |              |              |              |
|---|--------------|--------------|--------------|
| P | -1.860039000 | -0.388600000 | -1.313473000 |
| N | 1.613372000  | 0.736676000  | 0.665644000  |
| N | -1.417801000 | -1.901290000 | -1.947644000 |
| N | -0.255643000 | 0.159240000  | -1.494333000 |
| C | 1.073407000  | 1.751592000  | -0.151985000 |
| C | 0.154769000  | 1.488880000  | -1.189191000 |
| C | -0.354509000 | 2.537877000  | -1.962550000 |
| C | 0.031105000  | 3.852333000  | -1.726983000 |
| C | 0.956619000  | 4.121029000  | -0.715774000 |
| C | 1.465885000  | 3.083227000  | 0.056342000  |
| H | -1.046660000 | 2.303262000  | -2.766995000 |
| H | -0.376197000 | 4.655835000  | -2.334429000 |
| H | 1.274367000  | 5.142019000  | -0.520183000 |
| H | 2.176195000  | 3.288461000  | 0.851399000  |
| C | -0.051860000 | -2.030846000 | -2.215722000 |
| C | 0.629738000  | -0.829449000 | -1.946065000 |
| C | 1.994890000  | -0.721946000 | -2.174406000 |
| C | 2.675208000  | -1.842934000 | -2.669403000 |
| C | 2.003778000  | -3.038979000 | -2.921720000 |
| C | 0.623994000  | -3.144790000 | -2.697320000 |
| H | 2.515575000  | 0.211391000  | -1.983922000 |
| H | 3.741619000  | -1.771357000 | -2.863728000 |
| H | 2.548964000  | -3.898570000 | -3.302292000 |
| H | 0.093991000  | -4.070172000 | -2.903308000 |
| C | -2.373033000 | -2.960815000 | -2.209688000 |
| H | -2.372212000 | -3.227513000 | -3.272693000 |
| H | -2.141543000 | -3.851441000 | -1.614027000 |
| H | -3.372669000 | -2.613707000 | -1.932402000 |
| C | 0.716890000  | -0.211407000 | 1.322204000  |
| H | 0.529333000  | -1.099593000 | 0.709467000  |
| H | 1.169967000  | -0.540384000 | 2.260228000  |
| H | -0.238530000 | 0.267202000  | 1.547001000  |
| B | 3.016336000  | 0.588020000  | 0.824595000  |
| O | 3.956749000  | 1.391809000  | 0.210628000  |
| O | 3.572760000  | -0.397472000 | 1.615202000  |
| C | 5.240322000  | 0.751017000  | 0.428068000  |
| C | 4.981024000  | -0.071149000 | 1.735811000  |
| C | 6.308689000  | 1.824243000  | 0.548691000  |
| H | 7.271141000  | 1.376208000  | 0.820499000  |

|   |              |              |              |
|---|--------------|--------------|--------------|
| H | 6.428748000  | 2.336447000  | -0.411597000 |
| H | 6.043576000  | 2.571127000  | 1.300933000  |
| C | 5.506925000  | -0.139182000 | -0.783972000 |
| H | 5.445188000  | 0.469339000  | -1.691925000 |
| H | 6.501796000  | -0.593933000 | -0.737277000 |
| H | 4.760096000  | -0.935695000 | -0.854233000 |
| C | 5.776206000  | -1.361322000 | 1.845515000  |
| H | 6.851330000  | -1.150129000 | 1.827299000  |
| H | 5.541718000  | -1.861364000 | 2.790887000  |
| H | 5.538553000  | -2.048901000 | 1.030338000  |
| C | 5.140492000  | 0.765310000  | 3.004662000  |
| H | 4.744391000  | 0.199896000  | 3.853983000  |
| H | 6.192245000  | 0.996751000  | 3.202391000  |
| H | 4.582996000  | 1.705327000  | 2.931192000  |
| C | -2.816362000 | 0.991823000  | 0.388142000  |
| N | -2.432843000 | -0.367090000 | 0.256015000  |
| C | -2.516883000 | -1.370699000 | 1.246166000  |
| C | -3.286588000 | -1.129671000 | 2.393982000  |
| C | -3.381247000 | -2.095695000 | 3.392144000  |
| C | -2.704085000 | -3.312143000 | 3.277671000  |
| C | -1.918676000 | -3.541584000 | 2.148164000  |
| C | -1.817488000 | -2.582594000 | 1.140991000  |
| H | -3.806612000 | -0.182797000 | 2.494900000  |
| H | -3.990022000 | -1.890055000 | 4.269500000  |
| H | -2.776585000 | -4.061231000 | 4.061688000  |
| H | -1.361110000 | -4.470093000 | 2.048975000  |
| H | -1.170002000 | -2.772739000 | 0.292760000  |
| C | -4.203057000 | 1.362980000  | 0.383236000  |
| C | -5.223635000 | 0.437503000  | 0.053908000  |
| C | -6.558934000 | 0.832099000  | -0.009315000 |
| C | -6.929501000 | 2.152924000  | 0.253888000  |
| C | -5.931270000 | 3.080351000  | 0.585558000  |
| C | -4.597797000 | 2.698106000  | 0.648510000  |
| H | -4.958029000 | -0.600639000 | -0.132383000 |
| H | -7.320014000 | 0.095425000  | -0.260615000 |
| H | -7.972648000 | 2.455590000  | 0.209230000  |
| H | -6.201156000 | 4.113333000  | 0.797681000  |
| H | -3.834123000 | 3.432034000  | 0.901862000  |
| H | -2.617676000 | 0.793520000  | -1.599158000 |
| H | -2.052852000 | 1.692074000  | 0.716299000  |

**3NP<sup>1</sup>**

E(B3PW91-D3) = -2015.715642 au

E(DLPNO-CCSD(T)) = -2012.263026 au

G<sub>cont</sub> = 0.588670 au

G = -2011.674356 au

|   |              |              |              |
|---|--------------|--------------|--------------|
| P | -0.323807000 | -0.206886000 | -1.091482000 |
| N | 2.258946000  | -1.853123000 | 0.088065000  |
| N | -1.434206000 | -0.798090000 | -2.276293000 |
| N | -0.565527000 | -1.704263000 | -0.230308000 |
| C | 1.399426000  | -1.905070000 | 1.213744000  |
| C | -0.000140000 | -1.884589000 | 1.056615000  |
| C | -0.829681000 | -1.990067000 | 2.179227000  |
| C | -0.284337000 | -2.098152000 | 3.454499000  |
| C | 1.102603000  | -2.082949000 | 3.619844000  |
| C | 1.932546000  | -1.991304000 | 2.505192000  |
| H | -1.906363000 | -1.950412000 | 2.039289000  |
| H | -0.942205000 | -2.168399000 | 4.316879000  |
| H | 1.537930000  | -2.153088000 | 4.613621000  |
| H | 3.013348000  | -1.993876000 | 2.616035000  |
| C | -2.077575000 | -1.986032000 | -1.953570000 |
| C | -1.562107000 | -2.528908000 | -0.757690000 |
| C | -2.031491000 | -3.743086000 | -0.273896000 |
| C | -3.045740000 | -4.404631000 | -0.983779000 |
| C | -3.575556000 | -3.855758000 | -2.150088000 |
| C | -3.096629000 | -2.631818000 | -2.644735000 |
| H | -1.624143000 | -4.165082000 | 0.640019000  |
| H | -3.419653000 | -5.354903000 | -0.611173000 |
| H | -4.364763000 | -4.375507000 | -2.687366000 |
| H | -3.508768000 | -2.201303000 | -3.553167000 |
| C | -1.793304000 | -0.021794000 | -3.441249000 |
| H | -1.734582000 | -0.635002000 | -4.349166000 |
| H | -2.810933000 | 0.386356000  | -3.359429000 |
| H | -1.095465000 | 0.814933000  | -3.544366000 |
| C | 2.198619000  | -2.983101000 | -0.835546000 |
| H | 1.202136000  | -3.085719000 | -1.277787000 |
| H | 2.922578000  | -2.826707000 | -1.637692000 |
| H | 2.445608000  | -3.916871000 | -0.313692000 |
| B | 3.186512000  | -0.799980000 | -0.086650000 |
| O | 3.341391000  | 0.246526000  | 0.804405000  |
| O | 4.043162000  | -0.720950000 | -1.170234000 |
| C | 4.221369000  | 1.203115000  | 0.163871000  |
| C | 5.014322000  | 0.303018000  | -0.845071000 |
| C | 5.075802000  | 1.870551000  | 1.229210000  |
| H | 5.823714000  | 2.524523000  | 0.766470000  |
| H | 4.443288000  | 2.482136000  | 1.881097000  |
| H | 5.589713000  | 1.133490000  | 1.851004000  |

|   |              |              |              |
|---|--------------|--------------|--------------|
| C | 3.338306000  | 2.236339000  | -0.532863000 |
| H | 2.717711000  | 1.765553000  | -1.302509000 |
| H | 2.677147000  | 2.693271000  | 0.209719000  |
| H | 3.935299000  | 3.028455000  | -0.996488000 |
| C | 5.438290000  | 1.002490000  | -2.125943000 |
| H | 6.091525000  | 1.852808000  | -1.899746000 |
| H | 5.992764000  | 0.305016000  | -2.762381000 |
| H | 4.574329000  | 1.362271000  | -2.689952000 |
| C | 6.209054000  | -0.400193000 | -0.201072000 |
| H | 6.585216000  | -1.162060000 | -0.891133000 |
| H | 7.020485000  | 0.302393000  | 0.015621000  |
| H | 5.918765000  | -0.898056000 | 0.730447000  |
| C | -0.377795000 | 2.195122000  | 0.109455000  |
| N | -1.092339000 | 0.930340000  | -0.042254000 |
| C | -2.183088000 | 0.671066000  | 0.823819000  |
| C | -2.151607000 | 1.085259000  | 2.164323000  |
| C | -3.195806000 | 0.765220000  | 3.027878000  |
| C | -4.289023000 | 0.022100000  | 2.576928000  |
| C | -4.336626000 | -0.369655000 | 1.238641000  |
| C | -3.304881000 | -0.030892000 | 0.364799000  |
| H | -1.296631000 | 1.634500000  | 2.545303000  |
| H | -3.144939000 | 1.086513000  | 4.065639000  |
| H | -5.096800000 | -0.237252000 | 3.256467000  |
| H | -5.186574000 | -0.933615000 | 0.861913000  |
| H | -3.371225000 | -0.317941000 | -0.677823000 |
| C | -1.248506000 | 3.408818000  | -0.123981000 |
| C | -1.018770000 | 4.587585000  | 0.591553000  |
| C | -1.787514000 | 5.728224000  | 0.352133000  |
| C | -2.804410000 | 5.698072000  | -0.603504000 |
| C | -3.045811000 | 4.520701000  | -1.315779000 |
| C | -2.273044000 | 3.385067000  | -1.076451000 |
| H | -0.234852000 | 4.612299000  | 1.347012000  |
| H | -1.598009000 | 6.636758000  | 0.919081000  |
| H | -3.409856000 | 6.582462000  | -0.786635000 |
| H | -3.842086000 | 4.485715000  | -2.055837000 |
| H | -2.471865000 | 2.463661000  | -1.618142000 |
| H | 0.115671000  | 2.268238000  | 1.087481000  |
| H | 0.431117000  | 2.180501000  | -0.630053000 |

$TS_{1NP/3NP}^1$

$E(\text{B3PW91-D3}) = -2015.677567 \text{ au}$

$E(\text{DLPNO-CCSD(T)}) = -2012.224879 \text{ au}$

$G_{\text{cont}} = 0.597417 \text{ au}$

G = -2011.627463 au

|   |              |              |              |
|---|--------------|--------------|--------------|
| P | 0.559196000  | -0.464044000 | -1.615127000 |
| N | -1.155164000 | -1.834961000 | -0.916445000 |
| N | 2.092222000  | 0.344303000  | -1.927379000 |
| N | 1.465661000  | -1.617965000 | -0.623074000 |
| C | -0.587593000 | -2.537453000 | 0.184414000  |
| C | 0.801402000  | -2.389687000 | 0.344705000  |
| C | 1.400040000  | -2.910567000 | 1.500982000  |
| C | 0.634607000  | -3.621018000 | 2.422665000  |
| C | -0.733385000 | -3.816616000 | 2.227465000  |
| C | -1.343908000 | -3.251340000 | 1.109001000  |
| H | 2.440357000  | -2.711014000 | 1.721363000  |
| H | 1.117672000  | -4.007957000 | 3.316786000  |
| H | -1.321403000 | -4.373846000 | 2.952006000  |
| H | -2.416746000 | -3.321713000 | 0.957405000  |
| C | 3.208829000  | -0.309135000 | -1.428918000 |
| C | 2.860465000  | -1.473313000 | -0.711745000 |
| C | 3.860947000  | -2.347505000 | -0.294000000 |
| C | 5.204666000  | -2.014002000 | -0.518774000 |
| C | 5.545386000  | -0.833845000 | -1.174647000 |
| C | 4.543261000  | 0.023572000  | -1.647766000 |
| H | 3.616211000  | -3.297225000 | 0.166558000  |
| H | 5.980797000  | -2.696356000 | -0.182017000 |
| H | 6.589656000  | -0.582081000 | -1.341562000 |
| H | 4.799834000  | 0.928511000  | -2.191157000 |
| C | 2.232764000  | 1.163813000  | -3.114908000 |
| H | 2.841188000  | 0.654925000  | -3.876203000 |
| H | 2.705822000  | 2.127105000  | -2.889877000 |
| H | 1.241337000  | 1.359539000  | -3.536634000 |
| C | -1.587178000 | -2.678900000 | -2.030007000 |
| H | -0.752067000 | -3.309662000 | -2.356603000 |
| H | -1.896985000 | -2.039021000 | -2.859563000 |
| H | -2.426543000 | -3.329661000 | -1.748578000 |
| B | -1.984225000 | -0.626936000 | -0.578732000 |
| O | -2.842754000 | -0.685681000 | 0.531482000  |
| O | -2.598724000 | 0.072546000  | -1.628146000 |
| C | -3.991959000 | 0.138907000  | 0.280492000  |
| C | -3.987424000 | 0.256931000  | -1.289153000 |
| C | -5.214181000 | -0.569498000 | 0.854030000  |
| H | -6.132020000 | -0.026600000 | 0.600669000  |
| H | -5.133952000 | -0.612921000 | 1.945432000  |
| H | -5.296651000 | -1.593400000 | 0.482080000  |
| C | -3.807494000 | 1.470188000  | 1.008470000  |
| H | -2.945976000 | 2.024240000  | 0.632801000  |



|   |              |              |              |
|---|--------------|--------------|--------------|
| H | -3.635183000 | 1.271831000  | 2.071371000  |
| H | -4.694180000 | 2.105938000  | 0.914348000  |
| C | -4.453739000 | 1.602496000  | -1.824571000 |
| H | -5.491673000 | 1.795048000  | -1.529913000 |
| H | -4.402966000 | 1.601478000  | -2.918466000 |
| H | -3.832092000 | 2.424004000  | -1.459380000 |
| C | -4.763444000 | -0.870525000 | -1.972805000 |
| H | -4.558776000 | -0.836018000 | -3.047715000 |
| H | -5.843745000 | -0.773058000 | -1.821685000 |
| H | -4.444137000 | -1.849016000 | -1.600902000 |
| C | -0.572045000 | 1.903674000  | -0.769202000 |
| N | -0.311904000 | 0.511173000  | -0.253992000 |
| C | 0.294704000  | 0.467176000  | 1.066771000  |
| C | -0.447976000 | 0.052930000  | 2.174223000  |
| C | 0.144076000  | -0.010035000 | 3.435783000  |
| C | 1.484748000  | 0.331217000  | 3.607640000  |
| C | 2.227860000  | 0.754110000  | 2.504257000  |
| C | 1.634920000  | 0.833141000  | 1.247696000  |
| H | -1.480721000 | -0.239953000 | 2.039247000  |
| H | -0.448853000 | -0.343749000 | 4.284269000  |
| H | 1.946941000  | 0.270201000  | 4.590164000  |
| H | 3.273073000  | 1.031579000  | 2.618393000  |
| H | 2.211566000  | 1.191119000  | 0.403964000  |
| C | 0.131649000  | 3.039449000  | -0.074335000 |
| C | -0.295350000 | 3.473435000  | 1.188190000  |
| C | 0.352876000  | 4.519003000  | 1.841280000  |
| C | 1.438471000  | 5.157422000  | 1.236281000  |
| C | 1.861536000  | 4.746459000  | -0.027853000 |
| C | 1.208933000  | 3.695760000  | -0.674906000 |
| H | -1.123578000 | 2.966951000  | 1.676721000  |
| H | 0.014025000  | 4.833295000  | 2.825573000  |
| H | 1.947413000  | 5.971990000  | 1.745993000  |
| H | 2.699999000  | 5.241942000  | -0.511805000 |
| H | 1.543625000  | 3.379597000  | -1.657822000 |
| H | -1.649537000 | 2.061150000  | -0.722046000 |
| H | -0.331207000 | 1.907900000  | -1.837637000 |

## 7

E(B3PW91-D3) = -635.177233 au

E(DLPNO-CCSD(T)) = -633.978724 au

G<sub>cont</sub> = 0.221847 au

G = -633.756877 au

|   |              |             |              |
|---|--------------|-------------|--------------|
| C | -1.102793000 | 1.079517000 | -0.065810000 |
|---|--------------|-------------|--------------|

|   |              |              |              |
|---|--------------|--------------|--------------|
| N | 0.030432000  | 0.483573000  | -0.076459000 |
| C | 1.263316000  | 1.239276000  | -0.083500000 |
| C | -2.323448000 | 0.222463000  | -0.050636000 |
| C | -3.562186000 | 0.718504000  | 0.382302000  |
| C | -2.244824000 | -1.118571000 | -0.461041000 |
| C | -4.688811000 | -0.104963000 | 0.414555000  |
| H | -3.655724000 | 1.748196000  | 0.716221000  |
| C | -3.370075000 | -1.936765000 | -0.439347000 |
| H | -1.287246000 | -1.502648000 | -0.799801000 |
| C | -4.598238000 | -1.433793000 | 0.000928000  |
| H | -5.637743000 | 0.295130000  | 0.763459000  |
| H | -3.291907000 | -2.969853000 | -0.769742000 |
| H | -5.477307000 | -2.073440000 | 0.018520000  |
| C | -1.294992000 | 2.579523000  | -0.047203000 |
| H | -1.457581000 | 2.929593000  | 0.980989000  |
| H | -0.422267000 | 3.106156000  | -0.439724000 |
| H | -2.165885000 | 2.876746000  | -0.638863000 |
| C | 2.491173000  | 0.352834000  | -0.013155000 |
| C | 3.754355000  | 0.924034000  | -0.216054000 |
| C | 2.409448000  | -1.012240000 | 0.273573000  |
| C | 4.911316000  | 0.150479000  | -0.132929000 |
| H | 3.832749000  | 1.986725000  | -0.443142000 |
| C | 3.567289000  | -1.790344000 | 0.357342000  |
| H | 1.431025000  | -1.457943000 | 0.425149000  |
| C | 4.821572000  | -1.214159000 | 0.155106000  |
| H | 5.882934000  | 0.611412000  | -0.295930000 |
| H | 3.486001000  | -2.851836000 | 0.581011000  |
| H | 5.721783000  | -1.820837000 | 0.219071000  |
| H | 1.332917000  | 1.860252000  | -0.991629000 |
| H | 1.296613000  | 1.942559000  | 0.764845000  |

## 8

E(B3PW91-D3) = -1047.005747 au

E(DLPNO-CCSD(T)) = -1045.098016 au

G<sub>cont</sub> = 0.409296023 au

G = -1044.68872 au

|   |              |              |              |
|---|--------------|--------------|--------------|
| C | -0.838871000 | 0.912314000  | 0.985791000  |
| N | -0.076886000 | 0.327784000  | -0.130292000 |
| C | -0.790124000 | -0.425754000 | -1.154052000 |
| C | -2.078770000 | 1.624126000  | 0.465075000  |
| C | -3.378666000 | 1.184071000  | 0.726202000  |
| C | -1.907068000 | 2.755874000  | -0.344331000 |
| C | -4.482094000 | 1.856674000  | 0.192370000  |

|   |              |              |              |
|---|--------------|--------------|--------------|
| H | -3.542573000 | 0.305116000  | 1.342591000  |
| C | -3.001921000 | 3.430423000  | -0.879157000 |
| H | -0.896755000 | 3.097433000  | -0.563078000 |
| C | -4.298585000 | 2.980443000  | -0.611879000 |
| H | -5.486138000 | 1.496880000  | 0.405813000  |
| H | -2.846464000 | 4.307374000  | -1.503487000 |
| H | -5.156528000 | 3.503783000  | -1.027212000 |
| B | 1.330439000  | 0.344820000  | -0.102210000 |
| O | 2.127603000  | -0.225712000 | -1.084019000 |
| O | 2.069329000  | 0.931489000  | 0.913610000  |
| C | 3.476011000  | -0.234529000 | -0.556827000 |
| C | 3.442359000  | 0.962070000  | 0.453415000  |
| C | 4.456548000  | -0.071302000 | -1.706226000 |
| H | 5.478980000  | 0.032929000  | -1.325496000 |
| H | 4.420940000  | -0.954663000 | -2.352336000 |
| H | 4.217244000  | 0.803885000  | -2.315170000 |
| C | 3.679066000  | -1.584799000 | 0.130872000  |
| H | 3.477586000  | -2.382943000 | -0.590848000 |
| H | 4.704387000  | -1.700561000 | 0.497382000  |
| H | 2.990724000  | -1.704978000 | 0.974553000  |
| C | 4.365364000  | 0.810505000  | 1.651218000  |
| H | 5.406955000  | 0.718827000  | 1.322998000  |
| H | 4.286068000  | 1.693065000  | 2.294481000  |
| H | 4.106110000  | -0.067721000 | 2.247570000  |
| C | 3.662765000  | 2.314833000  | -0.223014000 |
| H | 3.417111000  | 3.110112000  | 0.487915000  |
| H | 4.703632000  | 2.441781000  | -0.538614000 |
| H | 3.014947000  | 2.427927000  | -1.098972000 |
| H | -1.623787000 | 0.175632000  | -1.536779000 |
| H | -0.097252000 | -0.576353000 | -1.988190000 |
| C | -1.310031000 | -1.769575000 | -0.684930000 |
| C | -2.676811000 | -2.057588000 | -0.690484000 |
| C | -0.416330000 | -2.737908000 | -0.211105000 |
| C | -3.148642000 | -3.286551000 | -0.221394000 |
| H | -3.379022000 | -1.305374000 | -1.044980000 |
| C | -0.880779000 | -3.965064000 | 0.257099000  |
| H | 0.648670000  | -2.515507000 | -0.201415000 |
| C | -2.251751000 | -4.242306000 | 0.256750000  |
| H | -4.216513000 | -3.493454000 | -0.224169000 |
| H | -0.175726000 | -4.707779000 | 0.623934000  |
| H | -2.615962000 | -5.198010000 | 0.626299000  |
| C | -1.101554000 | -0.093456000 | 2.110287000  |
| H | -1.593923000 | 0.397071000  | 2.958607000  |
| H | -1.720897000 | -0.933224000 | 1.783873000  |

|   |              |              |             |
|---|--------------|--------------|-------------|
| H | -0.144791000 | -0.499688000 | 2.453433000 |
| H | -0.187168000 | 1.688635000  | 1.403590000 |

$TS_{2NP/1NP}^2$

E(B3PW91-D3) = -2094.260311au

E(DLPNO-CCSD(T)) = -2090.641542 au

$G_{cont} = 0.646027$  au

G = -2089.995515 au

|   |              |              |              |
|---|--------------|--------------|--------------|
| P | 0.679947000  | -2.034716000 | -1.699387000 |
| N | -1.606037000 | -1.504414000 | -0.819122000 |
| N | 2.414330000  | -2.134548000 | -1.812996000 |
| N | 0.838028000  | -2.450959000 | -0.030993000 |
| C | -1.541201000 | -2.351246000 | 0.328628000  |
| C | -0.284623000 | -2.840230000 | 0.725013000  |
| C | -0.177233000 | -3.741391000 | 1.792805000  |
| C | -1.314005000 | -4.121398000 | 2.499204000  |
| C | -2.565694000 | -3.621785000 | 2.131667000  |
| C | -2.671284000 | -2.752541000 | 1.049702000  |
| H | 0.787563000  | -4.170149000 | 2.044296000  |
| H | -1.221216000 | -4.821604000 | 3.325583000  |
| H | -3.456647000 | -3.914134000 | 2.681705000  |
| H | -3.636201000 | -2.352419000 | 0.760525000  |
| C | 3.058187000  | -2.135075000 | -0.591262000 |
| C | 2.136800000  | -2.304526000 | 0.466834000  |
| C | 2.560723000  | -2.196616000 | 1.791659000  |
| C | 3.917918000  | -1.975597000 | 2.047728000  |
| C | 4.834591000  | -1.853722000 | 1.000075000  |
| C | 4.411613000  | -1.919807000 | -0.330054000 |
| H | 1.850160000  | -2.256851000 | 2.608701000  |
| H | 4.254272000  | -1.886823000 | 3.077132000  |
| H | 5.885684000  | -1.682604000 | 1.217476000  |
| H | 5.114025000  | -1.772893000 | -1.144773000 |
| C | 3.103676000  | -1.750874000 | -3.028966000 |
| H | 3.926412000  | -2.444035000 | -3.237758000 |
| H | 3.503611000  | -0.730676000 | -2.954372000 |
| H | 2.401267000  | -1.792477000 | -3.866793000 |
| C | -2.417031000 | -2.130212000 | -1.877274000 |
| H | -3.472696000 | -2.226611000 | -1.601679000 |
| H | -2.031236000 | -3.130784000 | -2.104565000 |
| H | -2.367300000 | -1.521191000 | -2.782339000 |
| B | -2.026460000 | 0.014439000  | -0.475487000 |
| O | -2.775888000 | 0.092166000  | 0.760515000  |
| O | -2.868534000 | 0.611268000  | -1.492999000 |
| C | -3.769491000 | 1.104354000  | 0.611098000  |

|   |              |              |              |
|---|--------------|--------------|--------------|
| C | -4.113718000 | 1.001163000  | -0.912361000 |
| C | -4.925464000 | 0.793248000  | 1.553775000  |
| H | -5.764116000 | 1.478623000  | 1.382171000  |
| H | -4.595887000 | 0.910879000  | 2.592163000  |
| H | -5.279654000 | -0.233305000 | 1.428490000  |
| C | -3.165601000 | 2.462102000  | 0.978512000  |
| H | -2.377058000 | 2.735784000  | 0.275265000  |
| H | -2.718234000 | 2.398800000  | 1.975955000  |
| H | -3.921575000 | 3.255488000  | 0.985813000  |
| C | -4.559581000 | 2.311574000  | -1.553259000 |
| H | -5.453543000 | 2.707106000  | -1.056090000 |
| H | -4.803282000 | 2.143108000  | -2.608500000 |
| H | -3.769424000 | 3.065454000  | -1.506629000 |
| C | -5.163449000 | -0.076233000 | -1.198614000 |
| H | -5.181840000 | -0.279733000 | -2.274479000 |
| H | -6.164841000 | 0.243493000  | -0.888191000 |
| H | -4.925788000 | -1.008690000 | -0.679661000 |
| C | 0.194999000  | 0.876312000  | -1.407469000 |
| N | -0.631253000 | 0.797626000  | -0.331130000 |
| C | -0.051604000 | 0.753437000  | 1.010860000  |
| C | 1.519589000  | 1.600687000  | -1.304110000 |
| C | 1.673048000  | 2.824095000  | -1.972729000 |
| C | 2.865203000  | 3.541053000  | -1.888255000 |
| C | 3.935782000  | 3.040200000  | -1.146216000 |
| C | 3.798133000  | 1.818258000  | -0.488250000 |
| C | 2.600749000  | 1.112147000  | -0.566632000 |
| H | 0.849246000  | 3.238682000  | -2.546211000 |
| H | 2.955010000  | 4.494632000  | -2.403035000 |
| H | 4.867166000  | 3.597386000  | -1.082046000 |
| H | 4.618622000  | 1.406326000  | 0.093533000  |
| H | 2.515907000  | 0.172596000  | -0.036030000 |
| C | -0.444341000 | 0.996878000  | -2.782076000 |
| H | -1.147096000 | 0.188386000  | -2.974119000 |
| H | -1.013806000 | 1.927755000  | -2.859383000 |
| H | 0.337274000  | 0.980174000  | -3.546833000 |
| H | -0.869839000 | 0.451658000  | 1.670370000  |
| H | 0.700686000  | -0.044924000 | 1.078449000  |
| C | 0.546021000  | 2.028276000  | 1.568078000  |
| C | 1.380353000  | 1.926851000  | 2.688057000  |
| C | 0.278811000  | 3.294803000  | 1.047292000  |
| C | 1.928838000  | 3.064136000  | 3.278551000  |
| H | 1.612272000  | 0.942163000  | 3.092052000  |
| C | 0.829270000  | 4.436716000  | 1.630464000  |
| H | -0.341959000 | 3.383735000  | 0.161543000  |

|   |             |              |              |
|---|-------------|--------------|--------------|
| C | 1.654539000 | 4.328132000  | 2.750407000  |
| H | 2.578003000 | 2.963408000  | 4.145579000  |
| H | 0.616959000 | 5.413859000  | 1.202206000  |
| H | 2.086133000 | 5.217738000  | 3.202998000  |
| H | 0.648828000 | -0.439215000 | -1.578000000 |

$TS_{2NP/3NP}^2$

E(B3PW91-D3) = -2094.234705 au

E(DLPNO-CCSD(T)) = -2090.614273 au

$G_{cont} = 0.642590$  au

G = -2089.971683 au

|   |              |              |              |
|---|--------------|--------------|--------------|
| P | -1.732792000 | -0.109222000 | 1.034391000  |
| N | 2.044029000  | -0.875526000 | -0.659069000 |
| N | -1.546561000 | 1.501934000  | 1.514385000  |
| N | -0.061896000 | -0.383592000 | 1.291150000  |
| C | 1.586916000  | -1.879437000 | 0.221184000  |
| C | 0.553009000  | -1.659197000 | 1.155687000  |
| C | 0.118269000  | -2.703279000 | 1.980015000  |
| C | 0.693160000  | -3.966278000 | 1.898064000  |
| C | 1.735309000  | -4.185716000 | 0.994891000  |
| C | 2.171618000  | -3.153876000 | 0.171655000  |
| H | -0.668215000 | -2.505268000 | 2.703015000  |
| H | 0.340512000  | -4.766274000 | 2.543119000  |
| H | 2.200487000  | -5.165333000 | 0.921024000  |
| H | 2.969719000  | -3.323608000 | -0.544528000 |
| C | -0.230373000 | 1.864221000  | 1.805828000  |
| C | 0.640916000  | 0.767154000  | 1.677525000  |
| C | 1.992479000  | 0.897400000  | 1.969467000  |
| C | 2.466074000  | 2.151776000  | 2.378316000  |
| C | 1.606325000  | 3.244671000  | 2.486368000  |
| C | 0.240407000  | 3.109571000  | 2.202922000  |
| H | 2.658466000  | 0.043015000  | 1.902083000  |
| H | 3.518279000  | 2.266210000  | 2.623160000  |
| H | 1.992181000  | 4.210564000  | 2.801552000  |
| H | -0.436549000 | 3.953537000  | 2.295622000  |
| C | -2.665600000 | 2.376182000  | 1.815329000  |
| H | -2.664840000 | 2.639788000  | 2.879820000  |
| H | -2.615551000 | 3.286071000  | 1.211711000  |
| H | -3.597881000 | 1.858933000  | 1.578104000  |
| C | 1.072860000  | -0.129242000 | -1.449945000 |
| H | 0.723000000  | 0.770390000  | -0.930692000 |
| H | 1.535565000  | 0.177928000  | -2.390867000 |
| H | 0.212453000  | -0.763142000 | -1.673246000 |

|   |              |              |              |
|---|--------------|--------------|--------------|
| B | 3.421519000  | -0.544918000 | -0.759877000 |
| O | 4.418965000  | -1.144078000 | -0.017812000 |
| O | 3.887729000  | 0.428573000  | -1.620074000 |
| C | 5.614926000  | -0.350398000 | -0.234160000 |
| C | 5.332994000  | 0.295680000  | -1.632894000 |
| C | 6.825157000  | -1.267183000 | -0.184965000 |
| H | 7.733672000  | -0.715238000 | -0.451152000 |
| H | 6.949217000  | -1.661681000 | 0.828843000  |
| H | 6.715054000  | -2.113428000 | -0.867375000 |
| C | 5.675670000  | 0.681788000  | 0.889794000  |
| H | 5.637981000  | 0.161645000  | 1.852278000  |
| H | 6.599513000  | 1.267790000  | 0.847157000  |
| H | 4.823705000  | 1.366305000  | 0.836927000  |
| C | 5.950142000  | 1.669070000  | -1.836833000 |
| H | 7.040413000  | 1.615840000  | -1.740807000 |
| H | 5.712810000  | 2.036293000  | -2.840608000 |
| H | 5.567842000  | 2.391870000  | -1.112156000 |
| C | 5.687571000  | -0.628944000 | -2.796579000 |
| H | 5.275530000  | -0.210580000 | -3.720235000 |
| H | 6.771699000  | -0.727175000 | -2.914060000 |
| H | 5.259351000  | -1.626935000 | -2.653432000 |
| C | -2.829785000 | -1.701006000 | -0.498517000 |
| N | -2.366534000 | -0.344243000 | -0.465178000 |
| C | -2.448536000 | 0.515723000  | -1.662457000 |
| C | -4.255704000 | -1.867123000 | -0.498106000 |
| C | -5.131161000 | -0.811988000 | -0.113733000 |
| C | -6.511007000 | -0.987193000 | -0.056742000 |
| C | -7.095111000 | -2.214105000 | -0.384616000 |
| C | -6.255755000 | -3.266092000 | -0.775548000 |
| C | -4.876996000 | -3.102746000 | -0.837033000 |
| H | -4.709841000 | 0.154041000  | 0.148117000  |
| H | -7.139560000 | -0.150720000 | 0.245911000  |
| H | -8.173350000 | -2.347149000 | -0.345687000 |
| H | -6.686929000 | -4.229183000 | -1.044569000 |
| H | -4.262572000 | -3.942207000 | -1.151533000 |
| C | -1.921367000 | -2.753501000 | -1.075064000 |
| H | -0.869967000 | -2.501158000 | -0.913115000 |
| H | -2.076337000 | -3.731628000 | -0.600733000 |
| H | -2.059671000 | -2.900928000 | -2.162987000 |
| H | -1.560766000 | 0.346552000  | -2.284348000 |
| H | -3.307950000 | 0.130165000  | -2.220363000 |
| C | -2.628789000 | 1.995921000  | -1.431339000 |
| C | -3.914531000 | 2.541935000  | -1.336577000 |
| C | -1.527319000 | 2.855763000  | -1.351899000 |

|   |              |              |              |
|---|--------------|--------------|--------------|
| C | -4.096811000 | 3.914384000  | -1.163358000 |
| H | -4.778822000 | 1.885219000  | -1.411495000 |
| C | -1.702488000 | 4.227151000  | -1.168191000 |
| H | -0.521805000 | 2.450957000  | -1.431580000 |
| C | -2.990128000 | 4.761713000  | -1.076844000 |
| H | -5.102837000 | 4.322195000  | -1.100778000 |
| H | -0.833646000 | 4.877372000  | -1.101473000 |
| H | -3.129278000 | 5.831548000  | -0.941813000 |
| H | -2.387657000 | -1.322424000 | 1.458922000  |

### 3NP<sup>2</sup>

E(B3PW91-D3) = -2094.318633 au

E(DLPNO-CCSD(T)) = -2090.711381 au

G<sub>cont</sub> = 0.647707 au

G = -2090.063674 au

|   |              |              |              |
|---|--------------|--------------|--------------|
| P | -1.586259000 | -0.497957000 | 1.628699000  |
| N | 2.326480000  | -0.961956000 | -0.529746000 |
| N | -1.666729000 | 1.205251000  | 1.831847000  |
| N | 0.162723000  | -0.325845000 | 1.415677000  |
| C | 2.041125000  | -1.754608000 | 0.602974000  |
| C | 1.005979000  | -1.462326000 | 1.524863000  |
| C | 0.793831000  | -2.337603000 | 2.603833000  |
| C | 1.576254000  | -3.469542000 | 2.796894000  |
| C | 2.614767000  | -3.742903000 | 1.904874000  |
| C | 2.832221000  | -2.893920000 | 0.827261000  |
| H | 0.007694000  | -2.095488000 | 3.313386000  |
| H | 1.387839000  | -4.119519000 | 3.647489000  |
| H | 3.244458000  | -4.618852000 | 2.038860000  |
| H | 3.624594000  | -3.108393000 | 0.116346000  |
| C | -0.467966000 | 1.883053000  | 1.669345000  |
| C | 0.613666000  | 0.998129000  | 1.455666000  |
| C | 1.914083000  | 1.486392000  | 1.395863000  |
| C | 2.123926000  | 2.872015000  | 1.485744000  |
| C | 1.051814000  | 3.747276000  | 1.642731000  |
| C | -0.258918000 | 3.256217000  | 1.745608000  |
| H | 2.753529000  | 0.805377000  | 1.314398000  |
| H | 3.138941000  | 3.258573000  | 1.445020000  |
| H | 1.226475000  | 4.818527000  | 1.705430000  |
| H | -1.096297000 | 3.931604000  | 1.894059000  |
| C | -2.864678000 | 1.876122000  | 2.290688000  |
| H | -2.696236000 | 2.348605000  | 3.268306000  |
| H | -3.187768000 | 2.639045000  | 1.573971000  |
| H | -3.671554000 | 1.144721000  | 2.384407000  |



|   |              |              |              |
|---|--------------|--------------|--------------|
| C | 1.241511000  | -0.538149000 | -1.405072000 |
| H | 0.936274000  | 0.493528000  | -1.194421000 |
| H | 1.568816000  | -0.592323000 | -2.447482000 |
| H | 0.383499000  | -1.198352000 | -1.273727000 |
| B | 3.635808000  | -0.488569000 | -0.805245000 |
| O | 4.736812000  | -0.715303000 | -0.003451000 |
| O | 3.917924000  | 0.284187000  | -1.914910000 |
| C | 5.775074000  | 0.176919000  | -0.484041000 |
| C | 5.363397000  | 0.385767000  | -1.980555000 |
| C | 7.125352000  | -0.488351000 | -0.278643000 |
| H | 7.921415000  | 0.115646000  | -0.728581000 |
| H | 7.331601000  | -0.583195000 | 0.792488000  |
| H | 7.150886000  | -1.488186000 | -0.718869000 |
| C | 5.678332000  | 1.460295000  | 0.339202000  |
| H | 5.744475000  | 1.206596000  | 1.401797000  |
| H | 6.488566000  | 2.155297000  | 0.095794000  |
| H | 4.722469000  | 1.964809000  | 0.167102000  |
| C | 5.734512000  | 1.740626000  | -2.560006000 |
| H | 6.819340000  | 1.889821000  | -2.518444000 |
| H | 5.421755000  | 1.793576000  | -3.607971000 |
| H | 5.246325000  | 2.554782000  | -2.019101000 |
| C | 5.851030000  | -0.738680000 | -2.893189000 |
| H | 5.357496000  | -0.645001000 | -3.865668000 |
| H | 6.933861000  | -0.688588000 | -3.047687000 |
| H | 5.601783000  | -1.720806000 | -2.477142000 |
| C | -2.803463000 | -2.085021000 | -0.158590000 |
| N | -2.298306000 | -0.722732000 | 0.105468000  |
| C | -2.125442000 | 0.206783000  | -1.014822000 |
| C | -4.226757000 | -2.032068000 | -0.683450000 |
| C | -5.273560000 | -1.867819000 | 0.233777000  |
| C | -6.591132000 | -1.729303000 | -0.197031000 |
| C | -6.884080000 | -1.746808000 | -1.563670000 |
| C | -5.852245000 | -1.919866000 | -2.485715000 |
| C | -4.534008000 | -2.068978000 | -2.046823000 |
| H | -5.043728000 | -1.826741000 | 1.297152000  |
| H | -7.388982000 | -1.602034000 | 0.530887000  |
| H | -7.909764000 | -1.630967000 | -1.905216000 |
| H | -6.070552000 | -1.939235000 | -3.550821000 |
| H | -3.745491000 | -2.210499000 | -2.781437000 |
| C | -1.840315000 | -2.920583000 | -1.003628000 |
| H | -0.890941000 | -3.034529000 | -0.469366000 |
| H | -2.256610000 | -3.916933000 | -1.190583000 |
| H | -1.625201000 | -2.460299000 | -1.974441000 |
| H | -1.072438000 | 0.483738000  | -1.099748000 |

|   |              |              |              |
|---|--------------|--------------|--------------|
| H | -2.381012000 | -0.323184000 | -1.939272000 |
| C | -2.941843000 | 1.478855000  | -0.938777000 |
| C | -4.332803000 | 1.455959000  | -0.786047000 |
| C | -2.298759000 | 2.716134000  | -1.047360000 |
| C | -5.061707000 | 2.643650000  | -0.738185000 |
| H | -4.847053000 | 0.505002000  | -0.692514000 |
| C | -3.024086000 | 3.908025000  | -0.996888000 |
| H | -1.215333000 | 2.750505000  | -1.139135000 |
| C | -4.410760000 | 3.875967000  | -0.842605000 |
| H | -6.142030000 | 2.606345000  | -0.616799000 |
| H | -2.502302000 | 4.859684000  | -1.067209000 |
| H | -4.979388000 | 4.801910000  | -0.799400000 |
| H | -2.847750000 | -2.556418000 | 0.832697000  |

$TS_{3NP/1NP}^2$

$E(B3PW91-D3) = -2094.261602$  au

$E(DLPNO-CCSD(T)) = -2090.653885$  au

$G_{cont} = 0.654033$  au

$G = -2089.999852$  au

|   |              |              |              |
|---|--------------|--------------|--------------|
| P | 1.304946000  | -0.908978000 | -1.389836000 |
| N | -0.053208000 | -2.344363000 | -0.421306000 |
| N | 2.569292000  | 0.278178000  | -1.767437000 |
| N | 2.336699000  | -1.402345000 | -0.007445000 |
| C | 0.476074000  | -2.583452000 | 0.878686000  |
| C | 1.776608000  | -2.088730000 | 1.080665000  |
| C | 2.329156000  | -2.199070000 | 2.367109000  |
| C | 1.617597000  | -2.842536000 | 3.380489000  |
| C | 0.346266000  | -3.368687000 | 3.154206000  |
| C | -0.229989000 | -3.218483000 | 1.892957000  |
| H | 3.279650000  | -1.745897000 | 2.609329000  |
| H | 2.067623000  | -2.913171000 | 4.367820000  |
| H | -0.197953000 | -3.866228000 | 3.952224000  |
| H | -1.238720000 | -3.562486000 | 1.687994000  |
| C | 3.703182000  | 0.210003000  | -0.980361000 |
| C | 3.608584000  | -0.800433000 | 0.000685000  |
| C | 4.744405000  | -1.150967000 | 0.729100000  |
| C | 5.932649000  | -0.426967000 | 0.552216000  |
| C | 5.997666000  | 0.618463000  | -0.364854000 |
| C | 4.883258000  | 0.932335000  | -1.152203000 |
| H | 4.744413000  | -2.007528000 | 1.391243000  |
| H | 6.809124000  | -0.702447000 | 1.132807000  |
| H | 6.920790000  | 1.178076000  | -0.493258000 |
| H | 4.937907000  | 1.716417000  | -1.902092000 |

|   |              |              |              |
|---|--------------|--------------|--------------|
| C | 2.692840000  | 0.756111000  | -3.133360000 |
| H | 3.608364000  | 0.369439000  | -3.602958000 |
| H | 2.712988000  | 1.852890000  | -3.185553000 |
| H | 1.832589000  | 0.405741000  | -3.714484000 |
| C | 0.025954000  | -3.537645000 | -1.277851000 |
| H | 1.072095000  | -3.857994000 | -1.350841000 |
| H | -0.346020000 | -3.291903000 | -2.273247000 |
| H | -0.562601000 | -4.364082000 | -0.863866000 |
| B | -1.275428000 | -1.442991000 | -0.543567000 |
| O | -2.182043000 | -1.396633000 | 0.526058000  |
| O | -1.971594000 | -1.541576000 | -1.759050000 |
| C | -3.522936000 | -1.375637000 | -0.008819000 |
| C | -3.314349000 | -1.961765000 | -1.447667000 |
| C | -4.405651000 | -2.211737000 | 0.907702000  |
| H | -5.410887000 | -2.318632000 | 0.483903000  |
| H | -4.496274000 | -1.716433000 | 1.880410000  |
| H | -3.986854000 | -3.207060000 | 1.074691000  |
| C | -4.036671000 | 0.058293000  | -0.044759000 |
| H | -3.432809000 | 0.654852000  | -0.728522000 |
| H | -3.974370000 | 0.508894000  | 0.948735000  |
| H | -5.078987000 | 0.096896000  | -0.378191000 |
| C | -4.258108000 | -1.420872000 | -2.512324000 |
| H | -5.298824000 | -1.650463000 | -2.256348000 |
| H | -4.031540000 | -1.891843000 | -3.474763000 |
| H | -4.159442000 | -0.340433000 | -2.636206000 |
| C | -3.356974000 | -3.491401000 | -1.464637000 |
| H | -2.975912000 | -3.849680000 | -2.425912000 |
| H | -4.379631000 | -3.861928000 | -1.336039000 |
| H | -2.735527000 | -3.916957000 | -0.671859000 |
| C | -0.224629000 | 1.359744000  | -1.605899000 |
| N | -0.060727000 | 0.221005000  | -0.610355000 |
| C | 0.480395000  | 0.736793000  | 0.693810000  |
| C | -0.602275000 | 2.726323000  | -1.059961000 |
| C | -1.882421000 | 3.057157000  | -0.603657000 |
| C | -2.178259000 | 4.346574000  | -0.171603000 |
| C | -1.200188000 | 5.343086000  | -0.206270000 |
| C | 0.074426000  | 5.035443000  | -0.678502000 |
| C | 0.364800000  | 3.737206000  | -1.100412000 |
| H | -2.647532000 | 2.294695000  | -0.547004000 |
| H | -3.173319000 | 4.571577000  | 0.204373000  |
| H | -1.431318000 | 6.349143000  | 0.135494000  |
| H | 0.846205000  | 5.801001000  | -0.712582000 |
| H | 1.367291000  | 3.499921000  | -1.452571000 |
| H | 1.408461000  | 1.284420000  | 0.476980000  |

|   |              |              |              |
|---|--------------|--------------|--------------|
| H | 0.758842000  | -0.133471000 | 1.283041000  |
| C | -0.369284000 | 1.588749000  | 1.614443000  |
| C | 0.111128000  | 2.834431000  | 2.034422000  |
| C | -1.552039000 | 1.105233000  | 2.181490000  |
| C | -0.599611000 | 3.605923000  | 2.951925000  |
| H | 1.035640000  | 3.220656000  | 1.612958000  |
| C | -2.269998000 | 1.876276000  | 3.094787000  |
| H | -1.903456000 | 0.121822000  | 1.892713000  |
| C | -1.803120000 | 3.134866000  | 3.478678000  |
| H | -0.217979000 | 4.581308000  | 3.244693000  |
| H | -3.194964000 | 1.486811000  | 3.516036000  |
| H | -2.365407000 | 3.737986000  | 4.188036000  |
| C | -1.105464000 | 0.996068000  | -2.797174000 |
| H | -1.028184000 | 1.799229000  | -3.538832000 |
| H | -0.793034000 | 0.055387000  | -3.257147000 |
| H | -2.152775000 | 0.885788000  | -2.512986000 |
| H | 0.781857000  | 1.529485000  | -1.991456000 |
